# Supplementary material for: Functional coupling between TRPV4 channel and TMEM16F modulates human trophoblast fusion
Source: eLife. 2022 Jun 7;11:e78840. doi: 10.7554/eLife.78840 (PMC9236608; doi:10.7554/eLife.78840)
Supplement: Figure 1—source data 1. [file elife-78840-fig1-data1.xlsx]

## Sheet: Fig. 1B,C
	BeWo Cell					Human trophoblasts
	TMEM16F	TRPV4	SYN1			TMEM16F	TRPV4	SYN1
	2.64375	0.04988	1			0.346021	0.083045	1
	2.45199	0.0442	1			0.280341	0.0176615	1
	2.5	0.04589	1			0.345919	0.0817036	1

## Sheet: Fig. 1G
	Time(s)	With GSK219					Without GSK219
	0	1	1	1	1		1	1	1	1	1
	5	1.01117	1.00183	0.984365	0.991709		1.00042	1.00419	1.01699	0.997972	0.983451
	10	0.995333	0.975447	0.976382	0.9825		0.995494	0.993686	1.05103	0.993397	0.957539
	15	1.0056	0.98101	0.989289	0.981706		0.986482	0.989371	1.07942	0.990402	0.922169
	20	1.01223	0.984936	0.983905	0.97761		0.994926	0.9867	1.09707	0.991813	0.889569
	25	1.02278	0.963013	0.976446	0.964901		0.998531	0.985553	1.10847	0.990352	0.872171
	30	0.996197	0.965449	0.990281	0.95244		0.996804	0.988199	1.11618	0.994679	0.840759
	35	1.00532	0.973229	0.979368	0.924639		1.01044	0.996623	1.127	0.996545	0.80066
	40	1.01249	0.974138	0.982976	0.953507		0.98856	0.984898	1.12345	0.986361	0.788016
	45	1.01752	0.97266	0.978997	0.932805		0.985831	0.991274	1.13221	0.988367	0.761151
	50	1.02331	0.979386	0.96701	0.942809		1.00056	1.00496	1.13142	0.975053	0.588944
	55	1.01878	0.97026	0.952319	0.93849		1.01415	0.988992	1.4728	0.967723	0.571312
	60	1.01793	0.977362	0.961626	0.930174		2.16513	2.15914	2.5932	2.0295	0.540844
	65	1.01743	0.971751	0.956928	0.933525		6.44855	5.66496	2.94769	5.18121	0.528808
	70	1.03434	0.989154	0.959746	0.926376		6.86407	5.9554	3.00745	5.46064	0.55151
	75	1.01985	0.976792	0.950084	0.931539		7.19427	6.0695	3.08778	5.59922	0.544016
	80	1.02456	0.968006	0.954483	0.910291		7.35651	6.15559	3.15586	5.68241	0.522723
	85	1.01747	0.965461	0.960529	0.916596		7.44319	6.18618	3.19895	5.69994	0.514271
	90	1.02898	0.96374	0.945055	0.917341		7.48699	6.18713	3.22268	5.71504	0.499126
	95	1.02848	0.982634	0.948566	0.923696		7.49482	6.19522	3.24303	5.74097	0.495882
	100	1.03046	0.978101	0.959124	0.922827		7.57966	6.20841	3.24455	5.79189	0.491843
	105	1.04476	0.982682	0.959867	0.93221		7.6616	6.23772	3.23972	5.83723	0.482811
	110	1.03517	0.967752	0.957485	0.937894		7.76403	6.28191	3.24668	5.87151	0.476788
	115	1.0262	0.964371	0.961449	0.944646		7.83992	6.31285	3.22205	5.91891	0.475193
	120	1.03342	0.976174	0.946427	0.948171		7.89763	6.39957	3.2339	5.96388	0.509542
	125	1.03816	0.977447	0.955831	0.948741		7.9994	6.44484	3.2434	6.0202	0.723476
	130	1.02866	0.969157	0.967285	0.968525		8.00829	6.49123	3.27804	6.04638	1.75705
	135	1.0219	0.977071	0.952392	0.944199		8.10803	6.52888	3.2866	6.08581	2.45615
	140	1.03001	0.970018	0.952634	0.949759		8.10574	6.59014	3.27495	6.12009	2.53039
	145	1.01959	0.965425	0.94587	0.940029		8.16771	6.60863	3.3113	6.14275	2.54765
	150	1.03325	0.960226	0.940018	0.936355		8.16382	6.63062	3.29293	6.15551	2.61674
	155	1.03512	0.964916	0.955274	0.929554		8.22753	6.62581	3.31907	6.14584	2.66401
	160	1.05111	0.970551	0.959665	0.930993		8.18781	6.65782	3.31253	6.16297	2.73984
	165	1.02301	0.966819	0.941479	0.913369		8.19223	6.66537	3.33957	6.15076	2.80369
	170	1.02865	0.959777	0.946613	0.898327		8.20302	6.65232	3.33729	6.14687	2.86237
	175	1.04239	0.969315	0.963564	0.922653		8.21856	6.6731	3.36486	6.15578	2.89064
	180	1.02914	0.966467	0.951811	0.929231		8.22551	6.63173	3.35783	6.12378	2.96743
	185	1.0284	0.965473	0.942456	0.947649		8.21545	6.64816	3.36835	6.12849	3.0379
	190	1.0353	0.958541	0.939114	0.972224		8.21517	6.64645	3.37502	6.11892	3.09031
	195	1.03223	0.966976	0.954507	0.946557		8.21601	6.6343	3.43668	6.1047	3.14484
	200	1.03138	0.969812	0.950778	0.955717		8.19794	6.61257	3.42579	6.08192	3.21162
	205	1.04168	0.959681	0.943505	0.951075		8.24682	6.62352	3.43827	6.08024	3.25896
	210	1.03944	0.980089	0.94478	0.947029		8.24802	6.60864	3.47155	6.05371	3.29155
	215	1.02845	0.982222	0.946532	0.938986		8.23733	6.61393	3.48703	6.05581	3.29869
	220	1.04068	0.952167	0.950584	0.928288		8.20912	6.58071	3.49322	6.0297	3.35889
	225	1.04934	0.963825	0.952707	0.93921		8.20229	6.57643	3.52298	6.01924	3.36614
	230	1.03318	0.964116	0.947032	0.928983		8.23007	6.57697	3.55366	6.0162	3.38804
	235	1.04445	0.965134	0.948526	0.966217		8.24667	6.57135	3.56788	6.01882	3.39068
	240	1.03511	0.960202	0.948881	0.989624		8.26451	6.58556	3.58685	6.00786	3.41133
	245	1.03674	0.963983	0.939162	0.982997		8.18531	6.56374	3.58388	5.97297	3.43339
	250	1.04842	0.944762	0.947864	0.981234		8.19494	6.52733	3.60555	5.94466	3.41975
	255	1.03951	0.944387	0.948631	0.976692		8.16821	6.5031	3.62677	5.92895	3.43308
	260	1.04188	0.945114	0.953813	0.959912		8.22511	6.52662	3.64916	5.9303	3.43154
	265	1.04079	0.958808	0.95144	0.952788		8.22695	6.49845	3.64878	5.92365	3.43976
	270	1.04034	0.958699	0.940752	0.9616		8.15991	6.48878	3.68515	5.89778	3.43681
	275	1.03309	0.960614	0.944482	0.957032		8.15841	6.49611	3.69322	5.88502	3.43052
	280	1.05011	0.952942	0.932971	0.961376		8.12355	6.47154	3.69355	5.8651	3.43367
	285	1.04931	0.95007	0.942722	0.945812		8.13867	6.46666	3.70523	5.86251	3.41711
	290	1.03633	0.960129	0.941083	0.946408		8.14015	6.46805	3.70378	5.85628	3.41088
	295	1.04663	0.95579	0.951948	0.951745		8.11314	6.45887	3.73926	5.83114	3.43538
	300	1.0497	0.948059	0.942383	0.936479		8.13551	6.43404	3.72618	5.82676	3.4075
	305	1.0456	0.952143	0.954458	0.941022		8.09424	6.42766	3.73363	5.8025	3.40405
	310	1.05815	0.953173	0.94202	0.933401		8.10294	6.44422	3.75072	5.8047	3.40203
	315	1.04764	0.937442	0.94252	0.947153		8.10459	6.40554	3.77413	5.7863	3.40324
	320	1.05247	0.949355	0.949236	0.943057		8.11466	6.41464	3.75677	5.77792	3.38182
	325	1.06835	0.961341	0.95085	0.928387		8.10501	6.40625	3.78994	5.76482	3.37817
	330	1.05093	0.946919	0.958196	0.938018		8.10676	6.41423	3.76635	5.77297	3.36668
	335	1.05681	0.944871	0.95236	0.931341		8.11098	6.42375	3.77375	5.76999	3.34784
	340	1.05576	0.951076	0.949656	0.929479		8.11907	6.38669	3.78272	5.74539	3.32338
	345	1.05774	0.949598	0.947517	0.928337		8.08798	6.39487	3.78357	5.73482	3.33085
	350	1.04994	0.942181	0.942988	0.934791		8.09152	6.37716	3.77916	5.71719	3.32399
	355	1.05117	0.944883	0.938387	0.90843		8.08219	6.38343	3.77662	5.70748	3.29975
	360	1.06126	0.948446	0.939049	0.911334		8.09758	6.38038	3.77387	5.70022	3.2922
	365	1.06517	0.939818	0.94637	0.930993		8.09209	6.36363	3.77603	5.68054	3.28088
	370	1.04646	0.94206	0.935554	0.914486		8.04719	6.32056	3.77317	5.65525	3.27879
	375	1.04503	0.940787	0.939259	0.918309		8.06711	6.34451	3.77027	5.66253	3.27021
	380	1.04913	0.951767	0.939187	0.919823		8.06016	6.34752	3.7652	5.65161	3.25539
	385	1.05052	0.940242	0.940317	0.919228		8.05262	6.31575	3.75624	5.62282	3.24356
	390	1.06126	0.940302	0.933746	0.899866		8.10361	6.31906	3.75991	5.62312	3.22403
	395	1.05151	0.935128	0.936813	0.916199		8.06544	6.31596	3.73708	5.61562	3.20782
	400	1.07288	0.941623	0.936006	0.923795		8.06647	6.28953	3.76446	5.601	3.20593
	405	1.06663	0.958723	0.943311	0.924465		8.02479	6.28118	3.75674	5.57722	3.19676
	410	1.06202	0.930147	0.927708	0.91471		8.02797	6.27598	3.74377	5.57573	3.16074
	415	1.03835	0.940218	0.93549	0.923969		8.02208	6.27058	3.7431	5.56612	3.18069
	420	1.05615	0.944338	0.935159	0.921958		7.98148	6.24074	3.75492	5.54781	3.14062
	425	1.06378	0.951137	0.944829	0.930199		8.01764	6.24521	3.73867	5.53397	3.12255
	430	1.05855	0.941587	0.943085	0.917316		7.99791	6.23063	3.70915	5.51917	3.12114
	435	1.06647	0.937297	0.940212	0.911681		7.99167	6.23087	3.72615	5.5088	3.1046
	440	1.05283	0.947465	0.941955	0.920742		7.96958	6.21578	3.70354	5.48777	3.09278
	445	1.05115	0.935612	0.941148	0.918905		7.9795	6.20728	3.70682	5.47508	3.0698
	450	1.06461	0.94063	0.944369	0.913394		7.93924	6.19686	3.69538	5.4628	3.03925
	455	1.05764	0.940157	0.926481	0.911731		7.97426	6.18481	3.69529	5.45233	3.05459
	460	1.06218	0.937988	0.941665	0.927568		7.89015	6.178	3.6728	5.43812	3.0478
	465	1.05632	0.925384	0.943085	0.921164		7.95529	6.17353	3.66778	5.44302	3.01899
	470	1.0625	0.927759	0.93373	0.917862		7.935	6.17783	3.67594	5.43752	3.00983
	475	1.06448	0.942811	0.939469	0.918036		7.93933	6.14975	3.66127	5.41914	2.99487
	480	1.05668	0.947792	0.937847	0.908728		7.91685	6.16814	3.6524	5.4187	2.97378
	485	1.04718	0.923639	0.933585	0.923447		7.91316	6.16835	3.65064	5.41407	2.98
	490	1.06084	0.930413	0.949293	0.90838		7.92955	6.1713	3.63169	5.3972	2.96217
	495	1.06077	0.928062	0.943279	0.925036		7.88158	6.12262	3.61951	5.37065	2.95355
	500	1.05191	0.932353	0.930065	0.920369		7.83671	6.11688	3.6092	5.34428	2.91912
	505	1.06363	0.92942	0.944724	0.907958		7.84841	6.11643	3.60174	5.3419	2.90575
	510	1.06612	0.93783	0.942875	0.930447		7.85876	6.10447	3.58598	5.3309	2.88795
	515	1.06426	0.935152	0.937839	0.910664		7.85357	6.12052	3.58934	5.34161	2.87197
	520	1.05922	0.928753	0.927676	0.916497		7.83169	6.08523	3.57248	5.30225	2.8544
	525	1.06317	0.940121	0.93708	0.912029		7.8475	6.04711	3.56041	5.28589	2.87008
	530	1.06913	0.932498	0.930445	0.920121		7.79126	6.04138	3.57131	5.26447	2.85922
	535	1.06889	0.934595	0.936143	0.913642		7.80202	6.04243	3.56004	5.25369	2.83353
	540	1.06425	0.931856	0.931978	0.919674		7.74535	6.03087	3.53152	5.2351	2.83111
	545	1.06731	0.927953	0.923858	0.923472		7.7387	6.00525	3.5157	5.22301	2.80031
	550	1.05762	0.934364	0.925351	0.91754		7.77001	5.98002	3.55216	5.20471	2.81617
	555	1.07475	0.931322	0.930977	0.924118		7.7716	5.97318	3.52399	5.18856	2.78241
	560	1.06553	0.926596	0.947501	0.916696		7.72657	5.96057	3.52546	5.16853	2.77633
	565	1.06339	0.937006	0.920145	0.91054		7.74407	5.96526	3.50611	5.1738	2.78731
	570	1.05999	0.927699	0.922526	0.899394		7.70862	5.92346	3.50264	5.14271	2.78006
	575	1.06647	0.928438	0.930178	0.911408		7.6948	5.93538	3.49121	5.13667	2.77755
	580	1.06146	0.928172	0.932907	0.914958		7.66644	5.90056	3.48311	5.11822	2.74919
	585	1.06182	0.915944	0.924149	0.920047		7.72146	5.88324	3.48795	5.10459	2.72262
	590	1.04997	0.924403	0.919685	0.91471		7.66363	5.91053	3.47854	5.10637	2.73445
	595	1.05109	0.920234	0.925246	0.917837		7.72044	5.87634	3.47854	5.08823	2.72225

## Sheet: Fig.1H
	Time (s)	+100 mV	-100mV
	0	21.8956	-9.68738
	2	20.3107	-9.21192
	4	19.8068	-9.06075
	6	18.1783	-8.5722
	8	16.8169	-8.16376
	10	15.3696	-7.72958
	12	14.8393	-7.57048
	14	18.334	-8.6189
	16	15.2429	-7.69156
	18	20.7065	-9.33065
	20	23.7681	-10.2491
	22	23.079	-10.0424
	24	31.053	-12.4346
	26	40.4328	-15.2485
	28	55.9033	-19.8897
	30	61.2015	-21.4792
	32	68.0973	-23.5479
	34	75.1072	-25.6509
	36	84.9032	-28.5897
	38	99.7633	-33.0477
	40	101.915	-33.6931
	42	103.996	-34.3175
	44	103.2	-34.0786
	46	96.9609	-32.207
	48	96.8671	-29.1788
	50	86.8704	-29.1798
	52	82.4119	-27.8423
	54	49.3372	-17.9198
	56	33.2271	-13.0868
	58	28.9755	-11.8113
	60	29.3622	-11.9274
	62	33.5856	-13.1944
	64	25.4435	-10.7517
	66	19.3473	-8.92288
	68	15.7172	-7.83385
	70	23.3322	-10.1184
	72	13.4978	-7.16804
	74	28.1307	-11.5579
	76	24.1681	-10.3691
	78	29.3793	-11.9325
	80	20.541	-9.28101
	82	21.8992	-9.68846
	84	21.6017	-9.5992
	86	29.46	-11.9567

## Sheet: Fig.1J
Basal						GSK101						GSK219
34.1415	16.6231	16.8355	20.8537	44.7711	33.5312	86.8144	41.2167	51.3204	58.4412	119.198	68.0351	38.5475	19.3517	21.0571	24.2106	54.6085	48.1606

## Sheet: Fig.1-S3
Time (s)	4α-PDD
0	1	1	1	1	1	1	1
5	1.0201	0.981471	0.992208	0.990409	1.00961	1.02438	0.997657
10	1.01729	0.973742	0.978263	0.986742	1.01917	1.0224	1.00435
15	1.01874	0.945825	0.953329	1.02271	1.01281	1.02527	0.989833
20	1.02263	0.950949	0.957171	0.981241	1.02029	1.0464	0.986212
25	1.03588	0.951163	0.955774	1.03032	1.02815	1.00038	0.981527
30	1.04527	0.941141	0.947418	1.01735	1.04631	1.03068	0.979587
35	1.04522	0.93372	0.9468	1.01143	1.04632	1.05766	0.991559
40	1.05091	0.93881	0.936267	1.0292	1.04215	1.03061	0.992837
45	1.06695	0.939495	0.921893	1.04654	1.0624	1.01445	0.99574
50	1.19845	1.80796	1.93181	1.15994	1.18641	1.12952	1.04653
55	2.29074	2.00728	2.11736	2.06178	2.23964	1.85922	1.44465
60	3.07839	2.17002	2.28959	2.74401	2.93736	2.02221	1.53533
65	3.36012	2.21136	2.28712	2.92327	3.184	2.09712	1.56389
70	3.62014	2.24218	2.29354	3.23724	3.46216	2.14346	1.62214
75	3.77012	2.28782	2.28827	3.56544	3.70372	2.15599	1.64503
80	3.88117	2.32397	2.28408	4.12045	3.95132	2.18304	1.63903
85	3.95192	2.30694	2.26476	4.40183	4.10494	2.26655	1.66673
90	3.97968	2.34083	2.28239	4.52144	4.18789	2.26585	1.7153
95	3.98147	2.36009	2.30149	4.58448	4.21339	2.33115	1.78461
100	3.94664	2.37969	2.29381	4.58209	4.18152	2.41421	1.80949
105	3.89104	2.39479	2.32068	4.63977	4.13347	2.36704	1.80161
110	3.85753	2.37748	2.2678	4.63018	4.10416	2.40784	1.81695
115	3.85405	2.38332	2.27508	4.62341	4.11913	2.44374	1.82135
120	3.77808	2.39903	2.30168	4.5457	4.04471	2.47104	1.83956
125	3.69395	2.44472	2.3479	4.46516	3.95402	2.48778	1.8394
130	3.6645	2.41344	2.29964	4.39351	3.93263	2.45666	1.8326
135	3.66437	2.42291	2.29647	4.38068	3.93242	2.46487	1.84747
140	3.61417	2.38936	2.27637	4.38618	3.87374	2.50076	1.85449
145	3.56522	2.43368	2.30512	4.39408	3.84777	2.47601	1.84802
150	3.55392	2.45274	2.34411	4.41396	3.84037	2.48835	1.84979
155	3.60419	2.40832	2.29276	4.41114	3.88306	2.42814	1.87171
160	3.53453	2.4031	2.29835	4.39661	3.82385	2.44953	1.87198
165	3.49945	2.45409	2.30359	4.33286	3.76641	2.43324	1.87068
170	3.51938	2.43685	2.32914	4.33893	3.79678	2.41949	1.8767
175	3.52538	2.44592	2.32358	4.42553	3.81018	2.36291	1.87652
180	3.53087	2.45036	2.31823	4.44457	3.8324	2.42604	1.88185
185	3.45212	2.44197	2.28774	4.24937	3.74464	2.4088	1.89448
190	3.45273	2.49012	2.36254	4.29196	3.74934	2.47734	1.89351
195	3.46975	2.46623	2.32901	4.32553	3.77227	2.35247	1.89639
200	3.47443	2.44677	2.31321	4.39196	3.77753	2.39327	1.90776
205	3.434	2.4845	2.34435	4.33244	3.73205	2.4578	1.91122
210	3.4246	2.44918	2.32688	4.2519	3.7092	2.45061	1.91138
215	3.41437	2.43921	2.33804	4.30607	3.71273	2.42458	1.89614
220	3.41829	2.42936	2.31885	4.29662	3.71861	2.49058	1.90017
225	3.36351	2.45999	2.31388	4.24993	3.66904	2.50649	1.91733
230	3.35328	2.48019	2.34432	4.19337	3.63121	2.42044	1.8231
235	3.34761	2.47598	2.32218	4.26276	3.65057	2.45806	1.83503
240	3.31909	2.50596	2.35765	4.21594	3.62352	2.43514	1.8416
245	3.30602	2.48047	2.35314	4.1512	3.60401	2.49828	1.84821
250	3.39728	2.46947	2.35061	4.30818	3.71543	2.45908	1.84682
255	3.32677	2.47009	2.33924	4.26911	3.63741	2.50236	1.84116
260	3.26673	2.46951	2.3407	4.19168	3.57341	2.54182	1.86214
265	3.21377	2.52475	2.34897	4.14344	3.52484	2.52947	1.8568
270	3.24318	2.54258	2.41053	4.17884	3.56048	2.59044	1.88944
275	3.28419	2.56174	2.40419	4.24993	3.6029	2.56358	1.86681
280	3.1696	2.54684	2.39231	4.17137	3.47959	2.60552	1.86478
285	3.16277	2.53331	2.36735	4.12172	3.47409	2.59451	1.86661
290	3.15824	2.53866	2.40486	4.12525	3.46304	2.56893	1.87432
295	3.13865	2.58021	2.39903	4.06178	3.43741	2.56702	1.89516
300	3.10859	2.58542	2.41362	4.10042	3.42069	2.65994	1.90453
305	3.07428	2.63432	2.44419	4.0385	3.37283	2.66172	1.89831
310	3.04953	2.57013	2.42146	4.02087	3.37353	2.6271	1.87841
315	3.00977	2.56114	2.4029	4.022	3.33083	2.65154	1.89891
320	2.98433	2.56292	2.39854	4.01481	3.29447	2.69412	1.93098
325	2.96976	2.58475	2.39159	3.9969	3.29483	2.74122	1.91049
330	2.94835	2.62166	2.43758	3.98956	3.26169	2.73549	1.91973
335	2.83819	2.58259	2.41413	3.94274	3.15251	2.75407	1.94102
340	2.79716	2.57879	2.39338	3.82694	3.10865	2.80569	1.92157
345	2.80579	2.57928	2.41096	3.88477	3.12796	2.79926	1.93294
350	2.7677	2.57467	2.43522	3.90099	3.07886	2.86564	1.95598
355	2.70234	2.58587	2.42146	3.80494	3.02439	2.83936	1.948
360	2.66579	2.60075	2.42235	3.79408	2.99388	2.92865	1.96583
365	2.61712	2.6402	2.43116	3.72073	2.92999	2.87093	1.96424
370	2.52293	2.64758	2.46287	3.63032	2.85172	2.93807	1.99785
375	2.48871	2.68429	2.46795	3.51354	2.82809	2.99319	2.00016
380	2.427	2.67406	2.47735	3.61989	2.75844	3.04487	2.00769
385	2.40108	2.67241	2.46152	3.52652	2.74795	2.99472	2.01079
390	2.41177	2.62229	2.4447	3.6646	2.77993	3.05295	2.04236
395	2.29979	2.62889	2.46867	3.4488	2.65721	3.08376	2.04695
400	2.1956	2.62801	2.44978	3.37588	2.55744	3.04003	2.07134
405	2.17647	2.64862	2.46625	3.4048	2.54332	3.12131	2.06672
410	2.15262	2.66811	2.49441	3.43399	2.54519	3.13206	2.07885
415	2.056	2.69583	2.45427	3.29379	2.43527	3.22791	2.10034
420	1.98569	2.65195	2.46623	3.26629	2.36145	3.20048	2.10213
425	1.93361	2.66475	2.46416	3.13977	2.31273	3.15542	2.13382
430	1.90357	2.62215	2.45964	3.289	2.31516	3.21264	2.11773
435	1.82002	2.6215	2.44449	3.14344	2.22051	3.21582	2.12069
440	1.73395	2.63749	2.46521	3.04386	2.13467	3.16185	2.14276
445	1.66222	2.70625	2.50897	2.98448	2.0532	3.16472	2.16245
450	1.63615	2.67843	2.47654	3.06234	2.06041	3.25496	2.16746
455	1.62084	2.64124	2.44691	3.06756	2.05565	3.25796	2.16414
460	1.53453	2.63488	2.46018	2.92059	1.95959	3.21207	2.17453
465	1.4761	2.63754	2.50156	2.87447	1.90221	3.32256	2.18826
470	1.42408	2.63706	2.48119	2.83808	1.84404	3.27839	2.18595
475	1.39307	2.65078	2.49256	2.82567	1.81651	3.37856	2.20434
480	1.36314	2.65001	2.45822	2.81509	1.79212	3.34445	2.19752
485	1.32804	2.61321	2.45061	2.82807	1.76599	3.37392	2.20777
490	1.29285	2.64421	2.46013	2.69436	1.73127	3.33497	2.20876
495	1.29442	2.66292	2.48847	2.87616	1.75162	3.32886	2.20365
500	1.24003	2.64253	2.48092	2.73258	1.68459	3.31524	2.21741
505	1.20532	2.61571	2.46518	2.60282	1.65003	3.2817	2.22297
510	1.18829	2.59126	2.42595	2.73752	1.63655	3.35501	2.24166
515	1.1867	2.55846	2.41816	2.69309	1.64059	3.3447	2.2271
520	1.16759	2.57397	2.42012	2.6945	1.62556	3.33993	2.23021
525	1.13313	2.52455	2.37374	2.65346	1.58132	3.39288	2.22459
530	1.11763	2.52306	2.40663	2.60395	1.58538	3.44202	2.26902
535	1.11181	2.51574	2.36101	2.63089	1.5637	3.4333	2.25748
540	1.09543	2.46329	2.31708	2.60028	1.55432	3.37233	2.23791
545	1.07833	2.44636	2.33726	2.5952	1.52819	3.40256	2.2609
550	1.07364	2.46558	2.32113	2.57348	1.52771	3.43661	2.26294
555	1.07557	2.47718	2.32879	2.68561	1.54992	3.43228	2.27262
560	1.04616	2.35382	2.23741	2.56192	1.49871	3.43241	2.26502
565	1.05021	2.3175	2.2282	2.61199	1.50616	3.45927	2.28316
570	1.04174	2.32594	2.22433	2.56164	1.49987	3.46016	2.28972
575	1.03889	2.32849	2.21202	2.57687	1.49528	3.46149	2.29136
580	1.05042	2.29496	2.17784	2.56615	1.51393	3.45634	2.28115
585	1.02048	2.27688	2.15941	2.57504	1.48148	3.48282	2.30632
590	1.0169	2.22059	2.13469	2.49718	1.46555	3.45761	2.29483
595	1.02659	2.21344	2.1146	2.55867	1.48726	3.48988	2.29855
600	1.04523	2.1562	2.08724	2.58195	1.51819	3.49905	2.31064
605	1.02496	2.14219	2.06454	2.54274	1.48443	3.47982	2.28008
610	1.01864	2.17121	2.06908	2.50719	1.47799	3.52037	2.31723
615	1.01448	2.12908	2.04724	2.52567	1.46261	3.46111	2.31307
620	1.02287	2.13509	2.05215	2.51834	1.48023	3.57625	2.33265
625	1.0299	2.08324	1.99978	2.60522	1.50661	3.56613	2.31536
630	1.01774	2.04712	1.96128	2.47447	1.46829	3.51413	2.33928
635	1.01791	2.03909	1.96859	2.54936	1.47761	3.54735	2.34252
640	1.01204	2.01903	1.95921	2.5519	1.46316	3.60196	2.33167
645	1.00568	1.97638	1.89854	2.53456	1.46276	3.54143	2.32651
650	1.00299	1.97953	1.91966	2.4952	1.45729
655	1.01538	1.94461	1.87557	2.58477	1.47298
660	1.0109	1.89415	1.84008	2.5048	1.46961
665	1.00914	1.86593	1.80249	2.53159	1.48208
670	1.00911	1.83354	1.76181	2.47052	1.45384
675	1.00733	1.82028	1.75222	2.52877	1.45951
680	1.00661	1.78554	1.72237	2.54795	1.47084
685	0.996291	1.78388	1.70665	2.48025	1.44273
690	1.00633	1.71837	1.65589	2.52243	1.48037
695	1.01421	1.68936	1.61779	2.51016	1.4791

## Sheet: Fig.1-S5B
Time (sec)	Scrambled siRNA
180	3.08228	3.10451	5.18614	1.53437	1.52948	6.30618	2.56306	2.8429	2.37604	3.08396	5.87092	5.036	2.89006	4.33674	3.62552	3.19028	4.22008	1.88944	1.95614	1.2473	5.8784	9.41269	3.21982	1.25305	2.15654	2.31337	1.73652	2.52364	2.01268	2.82766	1.40655	3.03334	7.0105	7.85168	5.03394	7.52583	4.19684	1.41023	2.94385	2.41637	1.67387	1.30047	2.31002	2.59249	1.78893	1.75492	4.65595	2.64036	5.61351
300	2.11449	3.79071	5.14361	1.19372	1.20434	4.5348	2.17366	2.09851	1.68301	2.28524	6.7902	6.28838	1.99747	3.51236	3.69314	2.44728	2.76383	1.46892	1.73589	1.14372	3.15396	8.34134	2.9806	1.05005	1.9025	1.45363	0.911158	1.27403	1.91382	2.37211	0.93905	3.05498	7.48854	8.08643	3.63172	8.11559	3.27511	1.06041	2.30431	2.36337	1.90349	1.08735	1.569	1.55432	1.72818	1.68967	3.55595	1.86258	3.25667
600	1.53761	5.30947	4.96998	1.14338	1.2087	2.05283	1.79574	1.36146	1.14149	1.84199	6.19576	7.56023	1.7632	1.87833	3.21303	1.68126	2.5457	1.30056	1.46107	1.16212	2.64858	6.93264	2.13222	1.06953	1.5836	1.25182	0.901217	1.25774	1.87779	0.955295	0.790323	3.91615	7.73242	6.65555	1.87277	6.66749	1.8055	1.00611	1.42365	1.49068	1.38624	0.975715	1.2934	1.24001	1.38002	1.49461	1.93763	1.92495	1.44476
[truncated: 107 more columns]

## Sheet: Fig.1-S5 C, E
Fig.S5 C																		Fig.S5 E
Time (s)	Control						siRNA 2					siRNA 4						Control	siRNA 2	siRNA 4
0	0	0	0	0	0		0	0	0	0		0	0	0	0			31.3517	0.863211	1.53631
5	0.111384	0.31224	0.041521	-0.20332	-0.01147		-0.8	0.233423	-0.13086	0.599623		-0.33162	0.607151	0.562166	-0.15207			19.4801	0.170299	0.17126
10	0.506366	0.043233	-1.01488	0.218379	0.528894		-1.04523	0.645319	-0.05456	0.424385		-0.08214	2.23226	0.522513	-0.13687			16.2268	10.3408	2.93531
15	0	0.182258	-1.44877	-0.18231	0.897172		-0.91008	0.314258	-0.01433	1.22607		-0.07095	0.754403	0.04668	-0.0709			30.8282	10.5008	6.76278
20	0.111384	0.162478	-1.21121	0.244933	1.25398		-0.73569	0.906444	-0.09803	-0.31471		-0.4453	0.515384	0.708731	-0.28257			23.292
25	0.506366	0	-1.05314	0.418527	1.11843		-0.11553	1.21616	-0.04254	1.1456		-0.21413	-0.22034	0.313207	-0.14529
30	-0.12043	0.31224	0	0.836657	1.08039		-0.94496	1.40508	-0.11513	1.20401		-0.33442	-0.01014	0.838731	0.027332
35	0.456634	0.043233	0.041521	1.22665	2.09493		-0.02398	1.49636	0.083692	1.18077		0.153097	0.281168	0.520003	-0.20283
40	0.482939	0.182258	-1.01488	1.58691	2.1695		0.068665	1.29064	-0.0504	2.33233		0.174713	1.3957	0.065251	-0.16523
45	0.598432	0.162478	-1.44877	2.20202	2.61924		-0.01744	1.14441	0.2053	2.09928		-0.06688	0.929933	0.219847	-0.02014
50	0.688649	0.357169	-1.21121	2.30705	2.95539		-0.57656	1.49454	0.167384	2.22981		-0.09842	0.219279	0.621394	0.108302
55	0.839696	0.257139	-1.05314	3.04819	3.30416		-0.4	0.440052	0.092478	1.81794		-0.27695	-0.22835	0.878384	0.115083
60	1.29612	0.623349	-1.37878	3.87335	4.11987		0.716073	1.0999	0.233043	2.92778		-0.10351	1.122	0.920547	0.244963
65	1.79119	0.960738	-1.11008	4.71041	4.44685		-0.73133	0.294277	0.379158	2.65718		-0.11368	-0.11898	-0.07027	0.259143
70	1.71721	0.960738	-0.77881	4.84912	4.0476		-1.56076	0.021344	0.549779	2.13444		-0.21896	-0.08856	0.675101	0.407518
75	1.79612	0.898856	-1.23405	5.06711	4.60976		-0.92643	1.16666	0.571049	2.71738		-0.11495	-0.57407	0.779001	0.372787
80	2.45271	1.12661	-1.15991	5.50862	4.77153		-0.31716	0.479108	0.424472	1.13249		-0.2917	-0.4647	0.9085	0.509243
85	2.91242	1.13706	-0.70259	5.94736	5.26027		-0.43706	0.219799	0.57706	3.09408		-0.14979	-0.88672	1.15294	0.457456
90	3.39577	1.50695	-1.25718	6.98932	5.51152		-0.91335	0.074477	0.871601	2.92897		-0.1297	-0.04802	0.82267	0.356347
95	4.29137	1.74685	-1.14804	6.80066	5.75704		-0.99727	0.197092	1.07598	3.60429		-0.4392	-0.58101	0.521509	0.473691
100	4.78787	2.55189	-1.53092	7.5969	6.29282		-0.74768	1.33605	1.29838	3.79682		-0.18768	-0.19153	0.608344	0.527122
105	4.92782	2.58834	1.21181	8.34993	7.25882		-0.33351	2.50362	1.38763	3.09348		0.013733	-0.62689	1.15294	0.533287
110	5.84191	3.05458	-0.03737	8.85525	7.23129		0.160217	3.08082	1.52588	2.65718		-0.16429	0.627958	0.469308	0.733244
115	6.71222	3.25606	-0.53117	9.41606	7.23817		-0.51226	2.98455	1.56934	3.02553		-0.31662	-0.7512	0.726298	0.53452
120	7.00877	3.79916	-0.70496	10.225	8.33727		-0.27466	3.49272	1.6535	2.2006		-0.06816	-0.33612	0.481856	0.893538
125	7.876	3.72343	-0.04063	10.9305	8.83748		-0.62234	4.3869	1.89949	2.895		-0.40105	-0.52819	1.18557	0.785853
130	7.96971	4.10914	0.123672	11.5697	9.13692		0.675746	4.03177	2.07011	4.29034		-0.10325	-0.48924	0.866338	0.914911
135	9.08643	4.68812	0.290347	11.7092	9.15413		0.136239	5.63712	2.19958	4.66585		0.149536	-0.60662	0.841241	1.02732
140	9.86016	5.11339	1.57096	12.5685	9.32048		0.069754	4.23704	2.52741	4.12166		-0.17624	0.089099	1.20364	1.25441
145	10.2767	5.06846	1.14864	13.4143	10.2601		0.649588	3.54313	2.58891	4.9901		-0.12665	-0.191	0.720777	1.05876
150	11.1183	5.26428	1.78301	13.8066	10.1821		-0.00218	3.15712	2.72762	5.16176		-0.05188	0.876047	0.553633	1.15987
155	11.258	5.93595	2.63033	14.5834	10.6754		-0.21689	3.72978	3.01708	5.83172		-0.21845	0.091233	0.828191	1.14549
160	12.2701	6.42847	3.6633	16.0717	11.3259		0.494821	4.53132	3.10077	5.39601		-0.2388	-0.9406	1.15244	1.28708
165	12.4401	6.64068	4.14909	17.0026	11.8514		0.807626	4.13622	3.42352	5.66483		0.111898	-0.01707	1.38032	1.21433
170	13.125	6.48357	3.55356	17.4858	12.0785		-0.0861	4.71024	3.54374	5.3817		0.217438	0.00907	0.572205	1.48067
175	13.5969	6.91251	4.40918	18.932	12.9964		-0.67684	3.21206	3.89839	5.59568		0.047048	0.68878	0.808615	1.72604
180	14.3932	7.52541	5.33954	20.7298	13.0021		0.00545	3.65076	3.70973	6.03855		0.128683	0.594347	1.27792	1.72604
185	14.8278	7.61301	6.43805	20.5379	13.3509		1.19128	3.17346	3.82533	6.44684		0.019073	-0.05495	0.816144	1.68104
190	15.4111	7.88625	6.92473	21.4693	14.2354		0.212533	2.81879	4.05375	7.29326		0.05722	0.418284	1.60569	1.84667
195	16.1157	8.6636	6.79572	22.8557	15.206		-0.09373	2.83423	4.36216	7.17501		0.338745	-0.48551	1.19109	1.85428
200	17.0773	8.64269	7.52619	23.3289	16.4026		0.50027	1.64486	4.67196	7.95766		0.499725	0.344123	1.48823	2.12328
205	17.5997	9.42767	7.67803	24.4501	16.7411		-0.84577	3.37782	4.76907	7.33395		0.387319	0.012272	0.95518	2.29776
210	17.5545	9.65401	8.36935	25.0652	17.0658		-0.24414	3.86738	5.07008	7.73386		0.601959	-0.25716	1.07364	2.88324
215	18.732	10.1937	8.70626	25.3351	17.1667		0.699724	2.64168	5.31838	7.57428		0.189463	-0.48817	1.20765	2.90975
220	19.1328	10.3308	8.12883	26.0188	17.769		-0.1297	2.67892	5.4645	8.21324		0.390625	0.204874	0.923558	3.24884
225	20.1204	10.3556	8.31063	27.1258	18.3473		-0.38365	3.25339	5.72991	8.37092		0.415802	-1.28846	1.03097	3.39536
230	20.1381	11.1799	8.59237	27.3152	19.054		0.463213	2.1712	5.86492	8.16111		0.509898	-0.43696	1.45611	3.79034
235	20.6819	11.7659	10.1515	26.6145	19.6506		-0.20599	3.80334	6.18027	8.03522		0.660452	-0.6557	1.67044	3.73527
240	21.785	12.2486	10.4377	28.7701	19.9053		-0.34877	1.79972	6.39991	8.42241		0.658163	0.645031	1.42599	4.01578
245	22.5524	13.2783	10.674	28.7413	20.3688		0.314985	1.58764	6.81559	8.54321		0.690715	-0.39054	1.25182	4.43687
250	23.7005	13.3006	11.793	28.5811	20.7015		-0.11444	0.243413	7.16192	8.67609		0.704448	0.026677	1.57457	4.74615
255	24.2733	14.0827	12.8939	29.1163	20.8644		0.25504	1.34196	7.2077	8.31052		1.07727	-0.69945	1.66441	4.71348
260	25.0631	14.5761	12.6397	29.0844	21.0468		0.2485	1.92415	7.44721	9.04485		1.2853	0.427353	1.48171	4.85589
265	26.3637	14.8875	13.3462	29.3684	21.0881		0.660488	1.21389	7.751	9.18154		1.37304	-0.23102	2.25971	5.34438
270	26.6306	15.8496	13.3954	29.4232	21.7042		0.607082	2.30698	7.68904	9.59416		1.13856	0.684511	2.29183	5.70257
275	27.6715	16.2472	13.6347	29.5687	21.6675		0.706264	2.03541	8.86952	10.3679		1.179	0.539926	2.04689	5.85691
280	28.2126	16.9115	14.3922	30.1217	21.9945		1.05504	0.870114	9.01332	10.2783		1.53631	-0.43482	1.79391	5.74265
285	30.0416	17.2679	15.0316	30.4954	22.0576		0.073024	1.37874	9.25885	10.8301		1.8575	0.431621	1.6082	6.05461
290	30.0172	18.2046	16.0328	30.7116	22.2251		-0.18529	1.01589	9.52796	11.031		1.13856	0.798152	1.98665	6.50035
295	30.8287	18.922	15.9205	30.7585	22.8618		0.38256	1.29927	9.95335	11.1709		1.179	-0.17393	2.58044	6.56405
300	31.3517	19.4801	16.2268	30.8282	23.292		0.863211	0.170299	10.3408	10.5008		1.53631	-0.17126	2.93531	6.76278
