# Supplementary material for: Functional coupling between TRPV4 channel and TMEM16F modulates human trophoblast fusion
Source: eLife. 2022 Jun 7;11:e78840. doi: 10.7554/eLife.78840 (PMC9236608; doi:10.7554/eLife.78840)
Supplement: Figure 2—source data 1. [file elife-78840-fig2-data1.xlsx]

## Sheet: Fig.2C
	Time (s)	KO							WT
	0	1	1	1	1	1			1	1	1	1	1
	5	1.00518	1.02542	1.0149	1.03405	1.02932			1.01349	0.995168	0.997456	0.997456	0.997456
	10	1.01074	1.02565	1.00896	1.02094	1.01881			1.04892	0.995744	0.989308	0.989308	0.989308
	15	1.0088	1.01766	0.985097	1.03165	1.01258			1.07809	0.991608	0.991092	0.991092	0.991092
	20	1.00272	1.05783	0.981437	1.0071	1.02858			1.09649	1.00429	0.989325	0.989325	0.989325
	25	1.01423	1.04108	0.994007	0.991215	1.01173			1.10913	0.99818	0.993798	0.993798	0.993798
	30	1.00078	1.02895	0.966004	1.06137	0.982715			1.11804	1.00015	0.988947	0.988947	0.988947
	35	1.02109	1.03586	0.96314	1.02732	0.995297			1.12718	1.00904	0.99628	0.99628	0.99628
	40	0.999871	1.04308	0.995704	0.977497	0.96708			1.1245	0.994057	0.992071	0.992071	0.992071
	45	1.00246	0.983413	0.995439	0.995788	0.995053			1.13142	0.990986	0.9952	0.9952	0.9952
	50	1.00673	1.15067	1.10003	1.01432	0.991694			1.13289	1.00521	0.978615	0.978615	0.978615
	55	1.45484	1.90462	1.94771	1.01215	0.980089			1.47288	1.01603	0.973331	0.973331	0.973331
	60	1.59239	2.06067	2.17666	1.13646	1.0284			2.59597	2.12269	2.04694	2.04694	2.04694
	65	1.5867	2.17532	2.25144	3.13863	1.775			2.95137	5.99781	5.49378	5.49378	5.49378
	70	1.59808	2.16495	2.35237	3.54874	2.08019			3.01086	6.37418	5.75219	5.75219	5.75219
	75	1.6523	2.22362	2.39395	3.97629	3.34936			3.09623	6.65808	5.89672	5.89672	5.89672
	80	1.66084	2.24412	2.38743	4.287	3.51359			3.16267	6.79773	5.99217	5.99217	5.99217
	85	1.74159	2.36185	2.43755	4.46811	3.79045			3.20107	6.87017	6.07862	6.07862	6.07862
	90	1.74482	2.35094	2.56945	4.73754	3.92378			3.23329	6.89369	6.07775	6.07775	6.07775
	95	1.87034	2.39802	2.59188	4.7089	4.07983			3.2534	6.90946	6.09068	6.09068	6.09068
	100	1.9124	2.42605	2.65213	4.742	4.19984			3.25677	6.98362	6.12358	6.12358	6.12358
	105	1.93323	2.43549	2.62286	4.98171	4.13828			3.25254	7.04401	6.18026	6.18026	6.18026
	110	1.88238	2.49393	2.66884	5.1219	4.18018			3.26097	7.12545	6.2399	6.2399	6.2399
	115	1.97257	2.47996	2.6873	5.29302	4.22507			3.24285	7.18586	6.28429	6.28429	6.28429
	120	1.90968	2.56543	2.67765	5.47822	4.16246			3.25078	7.23509	6.37339	6.37339	6.37339
	125	1.94242	2.5556	2.64662	5.62058	4.11672			3.25691	7.31896	6.42637	6.42637	6.42637
	130	1.87681	2.54346	2.66635	5.82166	4.09235			3.29075	7.32893	6.45784	6.45784	6.45784
	135	1.91447	2.61281	2.69319	6.11913	4.04801			3.30171	7.41379	6.48687	6.48687	6.48687
	140	1.89596	2.59353	2.71976	6.4645	4.05295			3.29149	7.43415	6.54269	6.54269	6.54269
	145	1.83269	2.6072	2.72973	6.60289	3.95926			3.33421	7.48632	6.56355	6.56355	6.56355
	150	1.88108	2.62126	2.76399	7.00144	3.96537			3.31575	7.48682	6.58193	6.58193	6.58193
	155	1.74547	2.59092	2.79369	7.17437	3.85971			3.34405	7.51759	6.60899	6.60899	6.60899
	160	1.73991	2.64345	2.71095	7.28652	3.76736			3.33721	7.50804	6.62226	6.62226	6.62226
	165	1.72114	2.63654	2.75768	7.64055	3.6683			3.3547	7.50606	6.64008	6.64008	6.64008
	170	1.61309	2.65428	2.79311	7.68748	3.61351			3.36423	7.49852	6.6325	6.6325	6.6325
	175	1.52329	2.64253	2.78876	7.75367	3.55585			3.38306	7.53134	6.66267	6.66267	6.66267
	180	1.43129	2.77722	2.78123	7.92515	3.49319			3.37911	7.53547	6.62424	6.62424	6.62424
	185	1.38419	2.76732	2.80849	7.89121	3.46766			3.39176	7.51384	6.64658	6.64658	6.64658
	190	1.33126	2.84526	2.78923	8.16366	3.34642			3.39978	7.51495	6.65108	6.65108	6.65108
	195	1.31897	2.7108	2.80361	8.12527	3.28174			3.46155	7.52099	6.65474	6.65474	6.65474
	200	1.32635	2.80126	2.8542	8.19194	3.25511			3.44968	7.50874	6.63277	6.63277	6.63277
	205	1.31561	2.82775	2.85086	8.29097	3.18036			3.46778	7.54012	6.6623	6.6623	6.6623
	210	1.36219	2.82944	2.85558	8.40638	3.17327			3.50113	7.54971	6.66758	6.66758	6.66758
	215	1.3301	2.84296	2.82344	8.08953	3.10352			3.51642	7.53555	6.64689	6.64689	6.64689
	220	1.36724	2.89195	2.83575	8.19326	3.03707			3.53001	7.51423	6.628	6.628	6.628
	225	1.34187	2.87007	2.88703	8.16029	2.97429			3.55502	7.50608	6.63108	6.63108	6.63108
	230	1.21066	2.82445	2.80053	8.27148	2.99615			3.58376	7.52265	6.63634	6.63634	6.63634
	235	1.25518	2.83551	2.81581	8.03418	2.90863			3.60231	7.52487	6.6352	6.6352	6.6352
	240	1.22723	2.84672	2.84588	8.10517	2.83766			3.61867	7.54892	6.63846	6.63846	6.63846
	245	1.24883	2.91491	2.82901	8.14476	2.83528			3.61504	7.47486	6.64095	6.64095	6.64095
	250	1.24004	2.89203	2.85945	8.16089	2.84102			3.63908	7.4896	6.61417	6.61417	6.61417
	255	1.22451	2.89579	2.86714	8.16173	2.83925			3.65701	7.47065	6.60455	6.60455	6.60455
	260	1.24987	2.97504	2.87457	8.23466	2.74885			3.68718	7.50869	6.62783	6.62783	6.62783
	265	1.24974	2.94947	2.83384	8.13117	2.66891			3.68243	7.5046	6.61671	6.61671	6.61671
	270	1.25194	2.98979	2.90199	8.09976	2.67037			3.71651	7.45563	6.59014	6.59014	6.59014
	275	1.25828	2.98265	2.8716	8.14007	2.68973			3.72539	7.46129	6.60863	6.60863	6.60863
	280	1.23589	2.97612	2.91976	8.03321	2.64246			3.72694	7.42091	6.59275	6.59275	6.59275
	285	1.27187	3.04838	2.89525	8.00217	2.69676			3.7421	7.43886	6.59077	6.59077	6.59077
	290	1.31612	2.94909	2.90241	8.02262	2.68442			3.73972	7.42421	6.57231	6.57231	6.57231
	295	1.32777	2.99132	2.95869	7.97232	2.60899			3.77744	7.40764	6.59249	6.59249	6.59249
	300	1.34162	3.00945	2.99422	8.02371	2.6184			3.76081	7.4165	6.57071	6.57071	6.57071
	305	1.32298	3.01259	2.96282	7.73779	2.5798			3.77054	7.37761	6.5611	6.5611	6.5611
	310	1.33579	3.04661	2.92182	7.91697	2.60765			3.78587	7.38565	6.58637	6.58637	6.58637
	315	1.36141	3.05222	2.94744	7.84188	2.49539			3.81384	7.40503	6.55276	6.55276	6.55276
	320	1.41343	3.11457	2.9861	7.758	2.55903			3.79608	7.39423	6.57364	6.57364	6.57364
	325	1.41654	3.09031	2.95943	7.77461	2.4698			3.82412	7.39752	6.55745	6.55745	6.55745
	330	1.38678	3.06504	3.00005	7.69266	2.47365			3.79679	7.40033	6.55608	6.55608	6.55608
	335	1.46649	3.14752	3.08088	7.70385	2.54529			3.81181	7.40598	6.56369	6.56369	6.56369
	340	1.45937	3.16311	3.01506	7.5716	2.41239			3.82119	7.39245	6.55165	6.55165	6.55165
	345	1.52032	3.14706	3.00795	7.57292	2.47426			3.81627	7.36766	6.55107	6.55107	6.55107
	350	1.50039	3.22377	3.08544	7.63815	2.46479			3.81469	7.37145	6.54439	6.54439	6.54439
	355	1.53895	3.16871	3.12379	7.69013	2.42705			3.81538	7.35521	6.55238	6.55238	6.55238
	360	1.5647	3.25403	3.07102	7.61143	2.42668			3.82537	7.39091	6.56039	6.56039	6.56039
	365	1.58864	3.13178	3.07415	7.65379	2.46558			3.81925	7.35348	6.55994	6.55994	6.55994
	370	1.63509	3.29504	3.19242	7.55162	2.44812			3.81603	7.33085	6.4983	6.4983	6.4983
	375	1.64985	3.26609	3.14155	7.38989	2.45832			3.80854	7.34659	6.53461	6.53461	6.53461
	380	1.7236	3.34465	3.15253	7.47208	2.46888			3.80977	7.34458	6.54814	6.54814	6.54814
	385	1.75311	3.2707	3.16234	7.50445	2.49301			3.79843	7.33415	6.52397	6.52397	6.52397
	390	1.85015	3.33574	3.19544	7.51588	2.48513			3.80357	7.3523	6.52169	6.52169	6.52169
	395	1.86542	3.36016	3.23172	7.39338	2.4607			3.77488	7.34404	6.50895	6.50895	6.50895
	400	1.9014	3.33082	3.28215	7.50963	2.47084			3.80229	7.33997	6.50456	6.50456	6.50456
	405	2.00556	3.3842	3.24959	7.33646	2.44946			3.79522	7.29911	6.50323	6.50323	6.50323
	410	1.99236	3.37153	3.29165	7.44789	2.44195			3.79001	7.31861	6.50351	6.50351	6.50351
	415	2.11749	3.53233	3.32856	7.35391	2.48146			3.78586	7.3	6.49829	6.49829	6.49829
	420	2.06625	3.46782	3.37147	7.61516	2.49765			3.79676	7.27907	6.47432	6.47432	6.47432
	425	2.14635	3.41031	3.39857	7.4586	2.68497			3.77114	7.28341	6.48902	6.48902	6.48902
	430	2.08553	3.43173	3.36314	7.58484	2.73841			3.7448	7.27014	6.45693	6.45693	6.45693
	435	2.15424	3.47858	3.4053	7.54428	2.73713			3.76543	7.26222	6.48465	6.48465	6.48465
	440	2.17016	3.36853	3.4446	7.53682	2.66182			3.7373	7.2631	6.45539	6.45539	6.45539
	445	2.14273	3.40938	3.50125	7.64128	2.65889			3.75399	7.2476	6.46485	6.46485	6.46485
	450	2.18297	3.48334	3.44927	7.55692	2.58603			3.74221	7.23155	6.44966	6.44966	6.44966
	455	2.20808	3.48648	3.4829	7.56595	2.56935			3.7296	7.2451	6.43892	6.43892	6.43892
	460	2.22955	3.46606	3.45834	7.61203	2.52507			3.71763	7.1882	6.43423	6.43423	6.43423
	465	2.27213	3.55199	3.53381	7.5343	2.4734			3.71022	7.23468	6.41776	6.41776	6.41776
	470	2.28028	3.45269	3.47738	7.84621	2.44341			3.7213	7.21046	6.44696	6.44696	6.44696
	475	2.29529	3.61066	3.49409	7.77232	2.55372			3.7109	7.20047	6.40357	6.40357	6.40357
	480	2.35015	3.61358	3.52342	7.83418	2.48501			3.70287	7.17714	6.42993	6.42993	6.42993
	485	2.37448	3.58816	3.49578	7.89254	2.46564			3.68425	7.18525	6.43629	6.43629	6.43629
	490	2.38897	3.58202	3.55131	7.72972	2.48207			3.67616	7.17756	6.4477	6.4477	6.4477
	495	2.35248	3.58086	3.54527	7.871	2.49038			3.66495	7.16275	6.37849	6.37849	6.37849
	500	2.40347	3.54815	3.57263	7.79711	2.54291			3.65864	7.11017	6.40635	6.40635	6.40635
	505	2.46144	3.56005	3.55842	7.91312	2.44641			3.64352	7.12711	6.39621	6.39621	6.39621
	510	2.40437	3.63976	3.57958	7.85668	2.48629			3.62792	7.13611	6.39545	6.39545	6.39545
	515	2.39583	3.58086	3.60838	7.84717	2.50156			3.63248	7.12841	6.41543	6.41543	6.41543
	520	2.42288	3.55076	3.57035	7.98436	2.46735			3.62545	7.10554	6.39919	6.39919	6.39919
	525	2.50026	3.63009	3.54924	7.96258	2.47016			3.6028	7.10982	6.34389	6.34389	6.34389
	530	2.55383	3.64483	3.65813	7.82202	2.49954			3.61846	7.08198	6.34864	6.34864	6.34864
	535	2.47399	3.59284	3.58775	7.76474	2.51585			3.60821	7.08864	6.35388	6.35388	6.35388
	540	2.56198	3.61135	3.59783	7.73935	2.48672			3.57763	7.0283	6.35004	6.35004	6.35004
	545	2.49845	3.61227	3.62604	7.91733	2.58859			3.5643	7.01781	6.32345	6.32345	6.32345
	550	2.48486	3.66894	3.58191	7.87112	2.56611			3.59602	7.04101	6.31929	6.31929	6.31929
	555	2.57686	3.68722	3.67653	7.91348	2.6176			3.57338	7.01756	6.32121	6.32121	6.32121
	560	2.58398	3.60137	3.6341	7.75367	2.61394			3.57016	6.98573	6.30414	6.30414	6.30414
	565	2.56056	3.6575	3.67441	7.82455	2.657			3.55693	7.00486	6.3121	6.3121	6.3121
	570	2.62616	3.66848	3.68263	7.75343	2.59983			3.5504	6.97707	6.26942	6.26942	6.26942
	575	2.60106	3.71709	3.62896	7.74994	2.66567			3.53293	6.96951	6.27464	6.27464	6.27464
	580	2.58929	3.70819	3.69456	7.77714	2.69853			3.52811	6.94031	6.24846	6.24846	6.24846
	585	2.58709	3.69129	3.66815	7.74308	2.77988			3.53697	6.97466	6.229	6.229	6.229
	590	2.56366	3.6714	3.63559	7.86017	2.8106			3.52406	6.93181	6.26858	6.26858	6.26858
	595	2.55072	3.66334	3.66571	7.71059	2.78758				6.95366	6.22897	6.22897	6.22897

## Sheet: Fig.2D
	Time (s)	KO							WT
	0	0.058094	0.058824	0.023494	0.014998	0.012935			0.061896	0.03588	0	0.040183	0.201307
	5	0.020739	0.049125	0.045933	0.02147	0.018631			0.095261	0	0.073389	0.10137	0.175163
	10	0.008624	0.057108	0.029606	0.020351	0.018668			0.107834	0.06983	0.043137	0.080365	0.044444
	15	0.019477	0.042104	0.042131	0.018459	0.015046			0.045938	0.005787	0.002241	0	0.138562
	20	0.030624	0.033964	0.038514	0.009628	0.006966			0.102031	0.042824	0.040896	0.042922	0.044444
	25	0.044927	0.045641	0.020948	0.020375	0.016767			0.062863	0.016204	0.016246	0.049315	0.044444
	30	0.025534	0.061134	0.037258	0.022018	0.019349			0.03675	0.028935	0.029692	0.060274	0.094118
	35	0.052583	0.035154	0.034144	0.012687	0.010953			0	0.027006	0.043137	0.024658	0.040523
	40	0.042866	0.04888	0.034043	0	0			0.048356	0.036265	0.030812	0.075799	0.109804
	45	0.030793	0.037745	0.04111	0.004186	0.000712			0.051257	0.021219	0.043697	0.022831	0.185621
	50	0.040426	0.045308	0.227168	0.039423	0.035956			0.105899	0.013889	0.073389	0.115982	0.05098
	55	0.023894	0.043452	0.033708	0.034005	0.031943			0.334623	0.064043	0.037535	0.192694	0.036601
	60	0.017626	0.037097	0.028149	0.041636	0.039157			0.182785	0.108796	0.067227	0.156164	0.052288
	65	0.019393	0.034191	0.038983	0.032878	0.029281			0.074468	0.103009	0.063305	0.174429	0.049673
	70	0.026754	0.02507	0.048344	0.042119	0.03842			0.136364	0.037809	0.072829	0.154338	0
	75	0.015607	0.041877	0.049215	0.049059	0.044606			0.197776	0.054398	0.061064	0.121461	0.043137
	80	0.012283	0.033386	0.027094	0.029352	0.027132			0.073017	0.107253	0.091317	0.069406	0.145098
	85	0.021748	0.037062	0.035534	0.054445	0.052946			0.098162	0.144676	0.112045	0.105023	0.090196
	90	0.113831	0.018522	0.046569	0.044494	0.04359			0.119439	0.097608	0.115966	0.078539	0.163399
	95	0.424743	0.041387	0.034747	0.056497	0.053528			0.109284	0.143904	0.134454	0.193607	0.044444
	100	0.435723	0.059506	0.031599	0.074659	0.071812			0.110251	0.197531	0.15014	0.088584	0.066667
	105	0.420957	0.059226	0.042366	0.055048	0.053708			0.117021	0.189815	0.156863	0.112329	0.108497
	110	0.409179	0.040861	0.036019	0.078749	0.076227			0.102031	0.303241	0.135574	0.134247	0.142484
	115	0.434335	0.035697	0.025101	0.084851	0.081831			0.175532	0.272377	0.147339	0.122374	0.044444
	120	0.414353	0.045011	0.025453	0.081542	0.079726			0.161992	0.290509	0.216807	0.147032	0.058824
	125	0.435554	0.05035	0.203624	0.078314	0.07437			0.204545	0.366127	0.266106	0.073059	0.054902
	130	0.437489	0.03069	0.232727	0.088707	0.085763			0.244197	0.469136	0.336134	0.118721	0.036601
	135	0.456251	0.043768	0.203892	0.084175	0.082289			0.319632	0.577546	0.387675	0.115068	0.11634
	140	0.41633	0.041877	0.231069	0.096258	0.095812			0.290135	0.548225	0.407283	0.121461	0.129412
	145	0.459069	0.025315	0.015372	0.09278	0.090827			0.338975	0.658179	0.503081	0.127854	0.118954
	150	0.473624	0.038638	0.027446	0.09596	0.095385			0.440522	0.797454	0.59888	0.188128	0.176471
	155	0.477957	0.057773	0.024632	0.093191	0.089057			0.501934	0.801698	0.666667	0.210959	0.203922
	160	0.463865	0.039478	0.014937	0.082935	0.08045			0.542553	1.06636	0.690756	0.191781	0.304575
	165	0.460331	0.040389	0.017415	0.091774	0.090029			0.639265	0.98534	0.831933	0.334247	0.341176
	170	0.481869	0.027346	0	0.10001	0.097106			0.729691	1.11188	0.912605	0.351598	0.36732
	175	0.469881	0.025665	0.031532	0.088731	0.083317			0.733559	1.19753	1.14398	0.430137	0.572549
	180	0.482248	0.011099	0.046351	0.100758	0.09684			0.925532	1.32292	1.22017	0.69863	0.85098
	185	0.477705	0.033683	0.023042	0.108736	0.106233			0.943424	1.46875	1.3479	0.811872	1.09281
	190	0.469754	0.038953	0.016009	0.098593	0.096734			0.938104	1.5054	1.45098	0.926027	1.28366
	195	0.464917	0.030725	0.031783	0.095743	0.094437			1.10928	1.62539	1.62577	1.24657	1.50196
	200	0.48351	0.031005	0.037845	0.094865	0.093075			1.1823	1.75193	1.8577	1.41096	1.5098
	205	0.477915	0.042384	0.021066	0.095598	0.093366			1.29255	1.84645	1.82913	1.63105	1.91242
	210	0.494616	0.026296	0.038715	0.097329	0.096759			1.3119	1.87732	2.0521	1.59087	2.29673
	215	0.487296	0.037237	0.027998	0.104035	0.103892			1.50725	2.03742	2.22073	1.83927	2.11503
	220	0.460205	0.045658	0.033658	0.114339	0.111675			1.50822	2.40008	2.41905	2.2621	2.3817
	225	0.488432	0.039093	0.016159	0.123807	0.120344			1.85638	2.17245	2.37535	2.21278	2.74771
	230	0.034158	0.022952	0.017181	0.118461	0.116746			1.76257	2.37191	2.53669	2.24657	2.7634
	235	0.014092	0.022794	0.011437	0.118381	0.116071			1.87331	2.3777	2.74454	2.74886	3.38693
	240	0.028058	0.032948	0.024733	0.129353	0.127087			1.97389	2.60764	2.95574	2.29772	3.2719
	245	0.009801	0.018662	0.037007	0.121391	0.119			2.2176	2.80015	3.0605	2.45936	3.33725
	250	0.042571	0.025648	0.021334	0.138152	0.134312			1.98694	2.87616	3.30756	2.8347	3.37386
	255	0.045095	0.018015	0.024582	0.126141	0.124313			2.23743	3.10648	3.48347	3.13699	3.71895
	260	0.035756	0.026243	0.019291	0.139279	0.135873			2.37331	2.97029	3.81793	3.01735	3.64052
	265	0.041898	0	0.042868	0.136405	0.135514			2.45116	3.18557	3.89132	3.10594	3.8915
	270	0.004165	0.010469	0.028417	0.132485	0.129433			2.48888	3.1794	4.16134	3.09041	4.46536
	275	0.02932	0.028309	0.047674	0.141397	0.137916			2.68714	3.39005	4.09412	3.14064	4.57386
	280	0.019813	0.033386	0.054138	0.145977	0.14412			2.67553	3.45718	4.39216	3.31507	4.81961
	285	0.038533	0.024912	0.036003	0.15212	0.150585			2.60348	3.58796	4.62185	3.48767	5.04444
	290	0.027343	0.008754	0.010751	0.164244	0.16181			2.6707	3.52431	4.74958	3.66575	4.85752
	295	0.025703	0.008648	0.027077	0.165234	0.161364			2.88008	3.66589	4.78655	3.22557	5.01438
	300	0.0114	0.006513	0.045698	0.17549	0.17194			3.07785	3.80286	5.10476	3.54429	5.24444
	305	0	0.017087	0.0249	0.172503	0.170708			3.14845	3.92245	5.31149	3.7653	5.16732
	310	0.001683	0.013253	0.033859	0.179137	0.176435			3.044	3.8642	5.1535	3.89954	5.51242
	315	0.007782	0.022759	0.051174	0.166884	0.163717			3.1852	4.24151	5.34958	4.05023	5.19085
	320	0.024609	0.030497	0.029137	0.175273	0.172027			3.11557	4.02932	5.3535	3.87763	5.42614
	325	0.01548	0.018838	0.030594	0.180425	0.176838			3.42602	4.01042	5.96359	4.09772	5.33856
	330	0.013587	0.04382	0.020362	0.170668	0.169321			3.32882	4.1875	6.00784	4.22648	5.50588
	335	0.01405	0.040966	0.01842	0.181149	0.178268			3.60203	4.28279	6.07115	3.91324	5.84052
	340	0.033317	0.045308	0.023025	0.19081	0.189698			3.41828	4.20911	6.19104	4.44384	6.22484
	345	0.0228	0.026838	0.026391	0.184724	0.18041			3.38346	4.35224	6.62689	4.33059	5.76471
	350	0.014597	0.021936	0.01924	0.176512	0.174664			3.69874	4.54437	6.2902	4.20731	6.1817
	355	0.013629	0.021481	0.020748	0.165564	0.163222			4.05754	4.40779	6.75966	4.5516	6.30196
	360	0.034284	0.05702	0.024867	0.168389	0.166912			3.92698	4.38117	7.21288	4.39726	6.09673
	365	0.024146	0.028817	0.045196	0.188169	0.183803			4.07543	4.58989	7.2521	4.79452	6.82353
	370	0.042655	0.034559	0.028852	0.174789	0.172764			4.21809	4.91512	7.32997	4.7516	7.18039
	375	0.015649	0.021534	0.02547	0.174798	0.172986			4.29884	4.8179	7.28796	4.80091	6.70196
	380	0.000631	0.027714	0.041294	0.178179	0.173903			4.34913	4.85494	7.43978	4.65297	7.45229
	385	0.026291	0.037623	0.032821	0.196203	0.194813			4.33462	5.03974	7.69916	4.7516	7.23399
	390	0.039584	0.017314	0.050973	0.213488	0.212236			4.36557	4.95332	8.09804	5.21005	7.06797
	395	0.023936	0.039443	0.04322	0.193796	0.190076			4.63346	5.0463	7.97423	4.85662	6.8902
	400	0.042571	0.042595	0.048243	0.191285	0.18963			4.57785	4.77315	8.04594	4.92329	7.37516
	405	0.054139	0.031355	0.034378	0.206733	0.201704			4.89362	5.07986	8.34342	4.69772	7.75425
	410	0.043202	0.028501	0.043756	0.209052	0.206038			4.69874	5.25733	8.26779	5.26393	7.66667
	415	0.032097	0.023529	0.054255	0.21356	0.210595			4.91634	5.34105	8.36415	5.42374	7.94248
	420	0.045894	0.021446	0.031649	0.212763	0.208267			4.99807	5.52083	8.80504	5.56804	7.8732
	425	0.04926	0.02598	0.032335	0.185488	0.181723			5.17457	5.66551	9.0112	5.36073	8.26797
	430	0.030119	0.063603	0.052932	0.208351	0.204874			5.12669	5.65702	9.05882	5.34247	8.26928
	435	0.04417	0.038883	0.037225	0.207643	0.203623			5.22485	5.66088	9.50364	5.24566	8.32549
	440	0.057505	0.040161	0.039318	0.215597	0.213097			5.24613	5.86265	9.67059	5.42009	8.32026
	445	0.047703	0.037115	0.060216	0.226457	0.223672			5.39458	6.09143	9.87563	5.42009	8.26275
	450	0.053845	0.038463	0.045229	0.22446	0.22236			5.11364	5.93596	9.78375	5.49041	8.31503
	455	0.013167	0.055532	0.036739	0.21959	0.21662			5.39072	6.21103	9.95686	5.2831	8.56209
	460	0.035672	0.063445	0.024817	0.22921	0.226409			5.27176	6.09028	10.2392	5.85936	8.57908
	465	0.05944	0.042104	0.016042	0.213874	0.210212			5.66441	6.28164	10.3053	6.20913	8.9085
	470	0.022842	0.04881	0.030359	0.208142	0.204187			5.71083	6.24691	10.7843	5.8621	8.31111
	475	0.048208	0.03132	0.043521	0.229492	0.227716			5.61412	6.68904	10.6762	5.72237	8.8915
	480	0.052667	0.057791	0.021719	0.213777	0.212509			5.93278	6.7064	10.6919	6.12694	9.51895
	485	0.059524	0.064723	0.020262	0.211056	0.207351			5.97582	6.4946	10.7507	5.89954	8.4915
	490	0.051068	0.055987	0.03339	0.211837	0.208292			6.21518	6.72878	11.0398	6.18173	9.28889
	495	0.047703	0.055322	0.042416	0.238122	0.23579			6.05996	6.84954	11.1899	6.63014	9.13333
	500	0.043034	0.057773	0.020128	0.229975	0.225165			6.17892	6.74498	11.1557	6.26393	9.45882
	505	0.062889	0.041929	0.02346	0.247991	0.245269			6.18714	6.91204	11.3389	6.42648	9.68235
	510	0.045179	0.042437	0.033407	0.244312	0.242465			5.9734	6.73727	11.5585	6.77626	9.53464
	515	0.060954	0.058316	0.045246	0.240102	0.238254			6.31383	7.55363	12.1294	6.43379	9.68235
	520	0.069914	0.062325	0.049533	0.243862	0.242347			6.31722	7.58835	12.1244	6.76438	9.71373
	525	0.035925	0.046831	0.050906	0.268721	0.26613			6.42795	7.37384	12.2129	7.00639	9.45359
	530	0.044085	0.060697	0.023678	0.2558	0.251517			6.86557	7.6304	12.4538	7.33242	9.73203
	535	0.066212	0.148704	0.015489	0.252331	0.249653			6.5793	7.70409	12.6773	7.51964	10.0209
	540	0.049007	0.168873	0.04754	0.276482	0.275653			6.51499	7.70139	12.5843	6.94612	10.2837
	545	0.056285	0.150928	0.05176	0.284524	0.28169			6.96857	8.10378	13.1832	7.07032	10.1006
	550	0.057631	0.16292	0.050152	0.287519	0.285231			6.53482	7.9186	13.242	7.40731	9.83399
	555	0.066339	0.151576	0.016126	0.294128	0.290618			6.69632	8.12307	12.9591	7.18539	10.468
	560	0.051237	0.172339	0.018939	0.282238	0.278817			6.90087	8.40239	13.5081	7.44475	10.7399
	565	0.061543	0.145851	0.029154	0.260896	0.258607			7.22776	8.78781	13.9457	7.6621	10.8353
	570	0.068989	0.155392	0.018989	0.270379	0.267188			7.54062	8.29668	13.7109	7.67671	10.3189
	575	0.060996	0.163901	0.044693	0.287438	0.284055			7.10832	8.90394	13.4476	7.6621	10.9216
	580	0.061291	0.171359	0.044727	0.283147	0.281479			7.34961	8.48032	14.2325	7.71507	11.1673
	585	0.057294	0.162027	0.047808	0.287519	0.284117			7.14555	8.84761	13.8258	7.76256	10.6797
	590	0.033443	0.182581	0.035684	0.292309	0.28933			7.64217	9.00231	14.0437	7.7032	10.9699
	595	0.067474	0.176436	0.047155	0.306147	0.303912

## Sheet: Fig. 2-S1B
Time (s)
0	0	0.053571	0.01963	0	0	0.044271
5	1.58561	0.033967	0.008232	0.000321	0.000906	0.042535
10	0.39155	0.021092	0.029889	0.003712	0.016405	0.044271
15	0.949213	0.031703	0.020643	0.012572	0.02148	0.082465
20	0.206698	0.054024	0.018237	0.017803	0.012352	0.002604
25	0.387558	0.023939	0	0.009049	0.020949	0
30	0.639499	0.054995	0.035081	0.03681	0.023863	0.064236
35	0.707696	0	0.024189	0.005779	0.018748	0.032118
40	0.567532	0.011322	0.0442	0.0028	0.020872	0.062066
45	0.179641	0.083204	0.028622	0.013065	0.022128	0.023003
50	1.06188	0.370212	0.046859	0.343153	0.27339	0.094184
55	1.03693	0.363095	0.043693	0.429033	0.290727	0.083333
60	0.977489	0.40198	0.085486	0.507301	0.323938	0.113281
65	1.22422	0.469268	0.115122	0.539594	0.344524	0.141059
70	1.08405	0.485443	0.148556	0.592084	0.369164	0.240017
75	0.934464	0.534097	0.165907	0.61267	0.3742	0.193142
80	0.922488	0.560753	0.1654	0.632851	0.386915	0.229167
85	0.988468	0.604555	0.22695	0.638503	0.407295	0.321615
90	0.99379	0.612642	0.198708	0.667043	0.395784	0.259549
95	1.08317	0.701799	0.221631	0.682927	0.412474	0.292101
100	1.06509	0.706651	0.265198	0.668271	0.409159	0.356771
105	1.10734	0.654503	0.284954	0.687453	0.380415	0.352865
110	1.24684	0.665437	0.285461	0.676029	0.388003	0.370226
115	1.25028	0.730137	0.328647	0.687418	0.374498	0.430556
120	1.23542	0.722761	0.313323	0.677076	0.378629	0.463542
125	1.56509	0.741977	0.335866	0.660298	0.390786	0.466146
130	1.55899	0.702446	0.305598	0.645264	0.426496	0.476563
135	1.67033	0.670549	0.343845	0.637006	0.433721	0.538194
140	1.52861	0.68653	0.394377	0.635116	0.417264	0.585069
145	1.65569	0.752588	0.443262	0.627428	0.38417	0.665799
150	1.8014	0.672943	0.520897	0.639004	0.41584	0.717014
155	1.6293	0.730396	0.571302	0.645348	0.419893	0.722222
160	1.67432	0.747153	0.615755	0.640474	0.410337	0.724392
165	1.70625	0.772645	0.624113	0.627934	0.384183	0.878472
170	1.53304	0.790243	0.597644	0.632309	0.367105	0.837674
175	1.83921	0.831263	0.64881	0.616576	0.401714	0.787326
180	1.664	0.787785	0.676165	0.605566	0.394334	0.829427
185	1.45919	0.763975	0.765578	0.599919	0.429319	0.802083
190	1.70537	0.72949	0.76773	0.617211	0.406867	0.808594
195	1.71413	0.814247	0.757599	0.604057	0.423531	0.931858
200	1.57563	0.838639	0.851824	0.623939	0.477769	0.911458
205	1.49667	0.812306	0.819402	0.605844	0.466712	0.866753
210	1.58649	0.839027	0.914134	0.624154	0.52675	1.04297
215	1.57585	0.841486	0.910588	0.644783	0.523927	0.950087
220	1.6874	0.844138	0.968338	0.663769	0.574203	0.972222
225	1.74118	0.932777	1.0057	0.674096	0.602843	0.998698
230	1.64704	0.948499	1.07257	0.686242	0.643978	1.07378
235	1.70548	0.857143	1.048	0.70949	0.636714	1.02127
240	1.73564	0.901786	1.06877	0.727504	0.707991	1.01476
245	1.67942	0.948434	1.13424	0.745833	0.737732	1.06597
250	1.77257	1.10818	1.13272	0.78951	0.784603	1.11545
255	1.91972	1.06755	1.19985	0.815304	0.839669	1.09245
260	2.0336	1.16253	1.25469	0.860059	0.942694	1.1237
265	2.13318	1.18879	1.27406	0.884419	0.995028	1.10026
270	2.08361	1.27459	1.32156	0.93854	1.10583	1.09939
275	2.49435	1.54885	1.37209	0.979134	1.23693	1.23481
280	2.53149	1.59194	1.35512	1.03331	1.32685	1.12066
285	2.61377	1.74372	1.38336	1.07048	1.41026	1.17752
290	2.58261	1.91861	1.42946	1.14841	1.5635	1.22179
295	2.84032	1.81282	1.45238	1.20988	1.74841	1.3138
300	2.76669	1.94688	1.51798	1.29005	1.93798	1.18446
305	3.31027	1.98848	1.56244	1.38906	2.14241	1.32812
310	3.25671	2.1646	1.58219	1.46052	2.34974	1.38976
315	3.30916	2.28533	1.56953	1.52613	2.45542	1.3776
320	3.77756	2.40379	1.66173	1.59289	2.74119	1.45312
325	3.67399	2.4571	1.73024	1.6804	2.88574	1.4796
330	3.96928	2.51507	1.72062	1.77574	3.0261	1.5829
335	4.34586	2.81502	1.66641	1.84384	3.45656	1.62283
340	4.13118	2.84394	1.67072	1.94282	3.53845	1.6671
345	4.49501	3.09757	1.66515	2.03986	3.77848	1.65234
350	4.71391	3.10941	1.75722	2.14323	3.91096	1.727
355	4.87092	3.24929	1.66793	2.2601	4.20598	1.70269
360	4.98902	3.45769	1.65286	2.34046	4.38106	1.67014
365	5.12786	3.5077	1.68706	2.4412	4.5191	1.77083
370	5.06853	3.69332	1.70036	2.55271	4.6895	1.70833
375	5.38933	3.80344	1.62817	2.6409	4.82868	1.79948
380	5.56276	3.7982	1.69314	2.72219	5.16919	1.8125
385	5.84265	4.12966	1.67515	2.80109	5.28899	2.10547
390	5.97505	4.34873	1.64362	2.87335	5.52561	1.92925
395	6.12087	4.28377	1.58473	2.97806	5.67282	1.88585
400	6.23808	4.26048	1.67642	3.05663	5.89562	1.92057
405	6.09426	4.52795	1.75051	3.12999	6.12577	1.97135
410	6.61588	4.58812	1.63488	3.21231	6.32378	1.94618
415	6.76414	4.69953	1.71758	3.30604	6.45958	1.93186
420	6.666	4.96196	1.76229	3.3327	6.54036	2.21094
425	7.21657	4.87694	1.72252	3.36165	6.83702	2.17622
430	6.95731	4.95911	1.72074	3.44065	6.86595	2.00868
435	7.40064	5.05648	1.87221	3.53967	7.08083	2.02083
440	7.47827	5.20212	1.79293	3.59932	7.27304	2.15929
445	7.57773	5.01462	1.9059	3.70778	7.31855	2.16493
450	7.51719	5.44455	1.85296	3.90875	7.26153	2.1454
455	7.79297	5.53022	1.78381	3.91549	7.47842	2.125
460	7.61776	5.65237	1.91844	3.98791	7.44193	2.16406
465	8.03282	5.77374	1.88665	4.18229	7.72818	2.11502
470	8.07108	5.76637	1.89691	4.25831	7.77133	2.21224
475	8.00222	5.78468	1.87449	4.33897	7.98694	2.13498
480	7.88545	5.81211	2.07459	4.3525	8.17881	2.17708
485	8.25127	6.0196	2.10157	4.40958	8.30519	2.13325
490	8.62264	6.11879	2.07523	4.54985	8.31446	2.1046
495	8.43879	6.16479	1.96809	4.56325	8.3965	2.21441
500	8.50011	5.93847	2.08827	4.59568	8.58494	2.20877
505	8.46496	6.53461	2.1635	4.72368	8.59615	2.31424
510	9.13695	6.81289	2.1383	4.78853	8.85005	2.27517
515	9.24473	7.07169	2.31839	4.93836	8.9005	2.22569
520	9.40586	6.6076	2.40514	5.04068	8.90959	2.15929
525	9.53959	6.78274	2.09954	5.18146	9.0398	2.17231
530	9.08638	6.68388	2.11233	5.26236	9.05979	2.08377
535	9.86704	7.02957	2.23341	5.34735	9.03541	2.18099
540	9.77146	6.88852	2.40856	5.43782	9.38708	2.32031
545	9.64671	7.35093	2.34866	5.48534	9.13033	2.26128
550	9.9613	7.72645	2.40337	5.6075	9.52679	2.34158
555	10.4077	7.70542	2.45732	5.80976	9.3724	2.37326
560	10.0194	7.58392	2.50367	6.05006	9.57545	2.46224
565	10.1129	7.62649	2.38171	6.1433	9.68164	2.4349
570	9.97793	8.04167	2.34308	6.25381	9.74535	2.43229
575	10.2746	8.23687	2.56079	6.22761	9.86002	2.43533
580	10.0141	7.90146	2.51735	6.26487	9.78665	2.50564
585	9.9695	7.79788	2.64552	6.3503	9.87947	2.63715
590	9.81382	7.71092	2.73354	6.38709	10.0424	2.49609
595	10.2493	7.83191	2.7885	6.49931	9.94449	2.59896
