# Supplementary material for: Functional coupling between TRPV4 channel and TMEM16F modulates human trophoblast fusion
Source: eLife. 2022 Jun 7;11:e78840. doi: 10.7554/eLife.78840 (PMC9236608; doi:10.7554/eLife.78840)
Supplement: Figure 3—source data 1. [file elife-78840-fig3-data1.xlsx]

## Sheet: Fig. 3ADE
Fig.3 A	Time (mins)	WT	16F-KO	Fig.3 D	WT	KO
	0	0.229749	0.237671		100	70.6847
	0.04	0.219135	0.233765		169.75	30.7503
	0.08	0.230123	0.234497		146.154	39.9647
	0.12	0.219966	0.233887		79.7101	39.6422
	0.16	0.209825	0.243774		130.612	28.2734
	0.2	0.228738	0.23645
	0.24	0.226113	0.267578	Fig.3 E	WT	KO
	0.28	0.214103	0.280029		6.4706	2.76253
	0.32	0.22442	0.237671		8.5949	3.06116
	0.36	0.235181	0.233765		6.1957	2.42683
	0.4	0.199209	0.234497		6.0215	2.80788
	0.44	0.21644	0.233887		8.4211	2.39764
	0.48	0.208439	0.243774
	0.52	0.23141	0.23645
	0.56	0.210022	0.267578
	0.6	0.222939	0.280029
	0.64	0.215285	0.237671
	0.68	0.222114	0.233765
	0.72	0.23399	0.234497
	0.76	0.260924	0.233887
	0.8	0.259367	0.243774
	0.84	0.26526	0.23645
	0.88	0.267821	0.267578
	0.92	0.270715	0.252026
	0.96	0.273966	0.213904
	1	0.272269	0.210388
	1.04	0.307123	0.211047
	1.08	0.28323	0.210498
	1.12	0.300976	0.219397
	1.16	0.3121	0.212805
	1.2	0.327051	0.24082
	1.24	0.302	0.252026
	1.28	0.309531	0.279712
	1.32	0.311676	0.343542
	1.36	0.328184	0.283887
	1.4	0.355795	0.262793
	1.44	0.365798	0.300366
	1.48	0.378519	0.34552
	1.52	0.366697	0.300916
	1.56	0.398949	0.309485
	1.6	0.409579	0.3453
	1.64	0.398658	0.341895
	1.68	0.407073	0.337061
	1.72	0.437398	0.330798
	1.76	0.439897	0.396497
	1.8	0.469085	0.376282
	1.84	0.453612	0.371118
	1.88	0.463263	0.331238
	1.92	0.472019	0.410779
	1.96	0.51488	0.399023
	2	0.498935	0.405396
	2.04	0.52219	0.414185
	2.08	0.52911	0.432751
	2.12	0.502226	0.45769
	2.16	0.537454	0.483838
	2.2	0.534041	0.460437
	2.24	0.600862	0.48219
	2.28	0.583659	0.465051
	2.32	0.582708	0.485376
	2.36	0.588159	0.505371
	2.4	0.609006	0.533936
	2.44	0.635254	0.557996
	2.48	0.619887	0.605457
	2.52	0.674447	0.583264
	2.56	0.643087	0.56283
	2.6	0.683771	0.607324
	2.64	0.684392	0.61875
	2.68	0.741422	0.625781
	2.72	0.705784	0.607214
	2.76	0.716673	0.590735
	2.8	0.744269	0.585461
	2.84	0.742118	0.612158
	2.88	0.783046	0.633142
	2.92	0.764833	0.613477
	2.96	0.788578	0.62688
	3	0.757345	0.65061
	3.04	0.77344	0.660718
	3.08	0.830687	0.752344
	3.12	0.801427	0.704114
	3.16	0.803191	0.679065
	3.2	0.828797	0.724548
	3.24	0.839389	0.744873
	3.28	0.817038	0.716638
	3.32	0.813818	0.683569
	3.36	0.880726	0.728943
	3.4	0.870891	0.706531
	3.44	0.882377	0.761023
	3.48	0.879381	0.774097
	3.52	0.86653	0.748169
	3.56	0.887495	0.797607
	3.6	0.883108	0.77146
	3.64	0.902189	0.801343
	3.68	0.898549	0.816943
	3.72	0.920029	0.806067
	3.76	0.970825	0.792224
	3.8	0.966408	0.822546
	3.84	0.958198	0.840125
	3.88	0.948418	0.85177
	3.92	0.954759	0.885168
	3.96	0.959402	0.888684
	4	0.979996	0.863196
	4.04	0.999036	0.87627
	4.08	1.00615	0.888135
	4.12	1.02038	0.943945
	4.16	1.01278	0.912195
	4.2	1.04057	0.913843
	4.24	1.02214	0.936694
	4.28	0.971373	0.908789
	4.32	1.06213	0.926147
	4.36	1.00795	0.94043
	4.4	1.04186	0.957239
	4.44	1.0397	0.934277
	4.48	1.03911	0.932959
	4.52	1.03483	0.937463
	4.56	1.01555	0.985034
	4.6	1.02405	0.97207
	4.64	1.08408	0.96405
	4.68	1.01328	0.943286
	4.72	1.06105	0.947241
	4.76	1.05209	0.995581
	4.8	1.04146	0.964819
	4.84	1.05032	0.982397
	4.88	1.00981	1.02206
	4.92	1.02609	0.994043
	4.96	1.04301	1.037
	5
	5.04
	5.08
	5.12
	5.16
	5.2	1.05101	1.07248
	5.24	1.03923	1.06875
	5.28	1.06454	1.10753
	5.32	1.06879	1.06523
	5.36	1.07504	1.06897
	5.4	1.08726	1.08831
	5.44	1.08996	1.14335
	5.48	1.07207	1.14049
	5.52	1.11709	1.14082
	5.56	1.11679	1.08962
	5.6	1.06353	1.10094
	5.64	1.12306	1.09676
	5.68	1.13728	1.12028
	5.72	1.12401	1.10028
	5.76	1.09823	1.0693
	5.8	1.06728	1.09655
	5.84	1.10407	1.08995
	5.88	1.12778	1.09764
	5.92	1.11912	1.11819
	5.96	1.09753	1.12192
	6	1.11486	1.12775
	6.04	1.13008	1.14774
	6.08	1.10264	1.15411
	6.12	1.10959	1.12555
	6.16	1.09906	1.15752
	6.2	1.14384	1.16653
	6.24	1.13982	1.14258
	6.28	1.16959	1.09699
	6.32	1.13182	1.1584
	6.36	1.1316	1.14576
	6.4	1.16465	1.14818
	6.44	1.1614	1.16697
	6.48	1.14128	1.16675
	6.52	1.15774	1.17477
	6.56	1.15579	1.16027
	6.6	1.17453	1.14379
	6.64	1.15888	1.14522
	6.68	1.1378	1.20355
	6.72	1.16361	1.15752
	6.76	1.17115	1.13511
	6.8	1.15719	1.15345
	6.84	1.20871	1.16213
	6.88	1.18494	1.15521
	6.92	1.1914	1.14313
	6.96	1.17614	1.15225
	7	1.19802	1.18531
	7.04	1.1769	1.17026
	7.08	1.18277	1.16894
	7.12	1.20138	1.1996
	7.16	1.19102	1.15796
	7.2	1.16839	1.17114
	7.24	1.14452	1.16038
	7.28	1.14707	1.23882
	7.32	1.19019	1.21652
	7.36	1.15664	1.18367
	7.4	1.1565	1.20915
	7.44	1.15931	1.18037
	7.48	1.16823	1.18883
	7.52	1.14161	1.21674
	7.56	1.15427	1.18125
	7.6	1.16514	1.24277
	7.64	1.14678	1.22289
	7.68	1.16139	1.19268
	7.72	1.1746	1.252
	7.76	1.15626	1.21476
	7.8	1.12704	1.2553
	7.84	1.15784	1.21003
	7.88	1.13259	1.22157
	7.92	1.15931	1.20487
	7.96	1.15088	1.23124
	8	1.12176	1.18916
	8.04	1.15698	1.21542
	8.08	1.17107	1.20729
	8.12	1.19231	1.23585
	8.16	1.19591	1.17817
	8.2	1.24493	1.21926
	8.24	1.25803	1.22333
	8.28	1.26621	1.24585
	8.32	1.27396	1.22025
	8.36	1.29035	1.22531
	8.4	1.29984	1.21597
	8.44	1.30537	1.24134
	8.48	1.31346	1.23267
	8.52	1.35924	1.22915
	8.56	1.41794	1.24255
	8.6	1.44283	1.25068
	8.64	1.4735	1.25057
	8.68	1.53661	1.24442
	8.72	1.54395	1.2386
	8.76	1.56333	1.25343
	8.8	1.55823	1.23585
	8.84	1.61331	1.24717
	8.88	1.63837	1.23552
	8.92	1.69488	1.26991
	8.96	1.73539	1.25508
	9	1.75019	1.25508
	9.04	1.78822	1.21036
	9.08	1.85263	1.24574
	9.12	1.88938	1.23695
	9.16	1.92794	1.23333
	9.2	1.93626	1.22761
	9.24	1.99824	1.24058
	9.28	2.02836	1.2397

## Sheet: Fig.3-S1 BCEF
Fig.S7B	Test Potential (mV)	WT						KO						Fig.S7C
	-100	-14.4852	-12.8826	-12.8634	-19.5982	-5.97636		-3.27165	-3.30466	-1.5441	-2.09254	-3.3774			WT	KO
	-80	-11.1737	-7.36331	-8.46661	-14.6154	-4.60815		-2.61352	-2.14848	-1.49221	-1.36677	-2.56827			178.292	17.5517
	-60	-8.87707	-4.3372	-7.04668	-10.5185	-3.48409		-1.73395	-1.45053	-1.24287	-0.76261	-1.54693			155.466	14.8839
	-40	-6.38882	-2.92326	-4.87245	-7.20924	-2.53805		-1.06966	-1.00548	-1.04651	-0.46526	-0.90968			161.644	12.8751
	-20	-3.5954	-1.71367	-2.34122	-4.09684	-1.48519		-0.46342	-0.41726	-0.75267	-0.11868	-0.34844			170.167	12.863
	0	-0.78068	-0.38601	-0.65642	0.049222	-0.09155		0.290277	0.099371	-0.18544	0.361581	0.457764			165.263	24.1767
	20	2.33211	2.2995	1.31053	3.99839	2.47192		1.11744	0.834995	0.873467	0.936068	1.45923
	40	7.39661	8.41824	5.48856	10.0641	7.39543		2.47172	1.87438	2.40002	1.85583	2.90092
	60	15.8677	17.9202	14.3248	18.5417	18.0562		4.55503	3.44924	4.26743	2.9559	4.94011
	80	31.2088	34.0026	30.9632	30.7109	36.8601		6.90293	5.42346	6.30544	4.5985	7.88488
	100	54.4703	55.2984	55.4153	48.0485	62.9629		9.29707	8.18229	8.36923	6.42825	11.1231
	120	87.76	82.5342	85.5218	76.2148	93.6228		12.7737	9.83909	11.0699	8.61469	15.4383
	140	131.241	116.11	122.273	105.956	128.133		14.9639	11.7064	12.7889	10.7988	17.381
	160	178.292	155.466	161.644	170.167	165.263		17.5517	14.8839	12.8751	12.863	24.1767
Fig.S7E	Test Potential (mV)	WT						KO						Fig.S7F
	-100	-82.9532	-79.8503	-78.3539	-77.125	-42.1177			-46.3431	-44.1197	-40.5336	-52.2723			WT	KO
	-80	-67.7816	-67.1964	-63.8835	-67.1779	-34.5955			-36.8827	-34.6592	-33.7925	-42.463			1293.82	81.9179
	-60	-58.1541	-54.8732	-49.8962	-53.0855	-25.929			-25.8092	-24.9808	-27.6182	-34.0053			1006.87	77.8198
	-40	-43.9998	-39.8798	-33.7728	-42.5789	-16.1434			-15.8255	-14.7356	-22.4466	-25.068			579.554	48.6537
	-20	-25.4967	-24.7591	-18.4123	-23.8072	-4.29789			-6.84466	-5.79834	-15.7492	-15.8691			851.722	65.2345
	0	-6.45955	-5.56946	-1.01725	-8.11259	10.4468			3.31334	3.88009	-8.9209	-6.49588			509.518
	20	17.3078	16.0107	19.7856	13.0752	29.413			12.207	12.2506	-2.13623	2.13623
	40	44.9916	52.2902	40.7155	35.7379	57.4329			21.5803	21.6239	5.34598	10.376
	60	87.0695	102.099	65.1805	62.7749	92.7006			31.6075	30.2124	13.5693	18.3541
	80	158.114	162.284	96.4101	99.4248	129.698			42.1143	39.1061	21.3131	26.5067
	100	285.005	281.724	139.872	173.917	184.064			51.8799	48.6537	29.1005	32.8282
	120	433.386	436.081	203.4	258.428	256.436			62.2995	58.5938	36.1032	40.4576
	140	726.801	669.377	276.642	380.324	371.431			72.6318	66.9643	44.4573	50.342
	160	1293.82	1006.87	579.554	851.722	509.518			81.9179	77.8198	48.6537	65.2345

## Sheet: Fig.3-S2A
Time (s)	Current	AnV
0	0.005434	-0.00029
5	0.000209	0.000434
10	0.003617	-0.00104
15	0.007933	-0.00126
20	0.009296	0.001847
25	0.005888	-0.00258
30	0.022681	-0.00459
35	0.021772	-0.00498
40	0.041763	-0.00353
45	0.01632	-0.00279
50	-0.0064	-0.00267
55	0.001327	-0.0022
60	-0.01594	0.001338
65	0.013594	-0.0011
70	0.004507	-0.00111
75	0.001327	0.001277
80	-0.01003	0.002397
85	-0.00322	0.003487
90	0.006324	-0.00149
95	0.017229	-0.00211
100	0.026315	-0.00017
105	0.036765	0.005991
110	0.021772	0.007709
115	0.024044	0.004571
120	0.02995	0.004734
125	0.036311	0.005257
130	0.035402	0.003774
135	0.038128	0.005992
140	0.049032	0.002482
145	0.059482	0.004259
150	0.044943	0.002497
155	0.046306	0.005523
160	0.059028	0.002868
165	0.042672	0.006749
170	0.048124	0.006193
175	0.077656	0.001717
180	0.070386	0.016273
185	0.038582	0.01612
190	0.066297	0.015085
195	0.068569	0.013568
200	0.057665	0.008869
205	0.053576	0.009789
210	0.074475	0.006711
215	0.070386	0.010956
220	0.065388	0.009332
225	0.084471	0.008427
230	0.098101	0.011976
235	0.084016	0.007732
240	0.111277	0.005598
245	0.099464	0.009664
250	0.12309	0.011065
255	0.119	0.010476
260	0.116274	0.006633
265	0.109459	0.010129
270	0.107642	0.00689
275	0.097088	0.008744
280	0.101177	0.010231
285	0.098791	0.009347
290	0.119237	0.001817
295	0.10254	0.018625
300	0.120259	0.020218
305	0.104244	0.019113
310	0.12503	0.012348
315	0.128778	0.016646
320	0.133889	0.009101
325	0.13866	0.013816
330	0.132526	0.011119
335	0.140704	0.011854
340	0.144793	0.008691
345	0.131163	0.003472
350	0.14786	0.004344
355	0.152971	0.005288
360	0.166942	0.004948
365	0.159786	0.002545
370	0.172735	0.003046
375	0.17035	0.003203
380	0.183299	0.005582
385	0.194931	-0.00219
390	0.177121	0.001601
395	0.175213	-0.00385
400	0.194295	0.005644
405	0.200338	0.007794
410	0.196522	0.005243
415	0.193341	0.004354
420	0.207335	0.003239
425	0.214968	0.006527
430	0.223237	0.006346
435	0.218148	0.005156
440	0.207653	0.004553
445	0.206985	0.00413
450	0.219764	0.008164
455	0.214368	0.007725
460	0.22647	0.009147
465	0.212612	0.014087
470	0.233512	0.014141
475	0.21761	0.01369
480	0.226924	0.014342
485	0.231922	0.018371
490	0.238344	0.018865
495	0.275657	0.022452
500	0.315116	0.027068
505	0.275486	0.027787
510	0.294091	0.031174
515	0.411209	0.04023
520	0.330995	0.046145
525	0.410084	0.055788
530	0.425248	0.063082
535	0.467331	0.072585
540	0.432574	0.079493
545	0.500043	0.085826
550	0.501692	0.096802
555	0.499478	0.103654
560	0.521899	0.114258
565	0.526838	0.12531
570	0.518911	0.131932
575	0.55338	0.146356
580	0.595615	0.164869
585	0.615736	0.177072
590	0.645059	0.194376
595	0.633585	0.209432
600	0.622226	0.224215
605	0.610173	0.231924
610	0.679598	0.249971
615	0.602523	0.267431
620	0.669515	0.285272
625	0.729135	0.306282
630	0.725194	0.321812
635	0.702617	0.3429
640	0.701434	0.363178
645	0.708504	0.381521
650	0.776771	0.403878
655	0.747564	0.421131
660	0.805747	0.439613
665	0.765297	0.464186
670	0.799326	0.481879
675	0.834954	0.504118
680	0.788593	0.530883
685	0.751041	0.555899
690	0.770165	0.577546
695	0.730294	0.603197
700	0.845849	0.631939
705	0.840865	0.647012
710	0.830666	0.675546
715	0.820119	0.699156
720	0.83055	0.723313
725	0.914232	0.749427
730	0.911798	0.783252
735	0.944367	0.809303
740	0.944367	0.835412
745	0.935674	0.861294
750	1.03141	0.889658
755	1.00313	0.916013
760	1.035	0.935099
765	1.04972	0.959046
770	1	1
