# Supplementary material for: Functional coupling between TRPV4 channel and TMEM16F modulates human trophoblast fusion
Source: eLife. 2022 Jun 7;11:e78840. doi: 10.7554/eLife.78840 (PMC9236608; doi:10.7554/eLife.78840)
Supplement: Figure 4—source data 1. [file elife-78840-fig4-data1.xlsx]

## Sheet: Fig. 4B
Fig.4 B		Time (sec)	Scrambled siRNA
		0	0.182403	0.199461	0.287474	0.145511	0.049485	0.014652	0.173442	0.08958	0.067588	0.168342	0.183673	0.039773	0	0.024246	0.237762	0.162362	0.397849	0.044474	0.39071	0.505896	0.209122	0.090592	0	0.130495	0.271186	0.131926	0.091104	0.06135	0.049931	0.110849	0.157282	0.157282	0.114973	0.111712	0	0.036825	0.156006	0.067553	0.188983	0.166193	0.013678	0.083286	0.177419	0.294595	0.595773	0.26638	0.203125
		5	0.17382	0.196765	0.119097	0.136223	0.220619	0.164835	0.254743	0.246801	0.185868	0.148241	0.142857	0.170455	0.057881	0.027794	0.102564	0.238007	0.027957	0.225067	0.379781	0.538915	0.07401	0	0.11349	0	0.293351	0.076517	0	0	0.15534	0.075472	0.114563	0.114563	0.082888	0.091892	0.063659	0.095745	0.302652	0.03883	0	0.06108	0.046353	0.064023	0.224654	0.222973	0.574637	0.16971	0.184896
		10	0	0.218329	0.219713	0.037152	0	0.014652	0.092141	0.182815	0.215054	0.128141	0.052154	0.195455	0.081923	0.023655	0.135198	0.151292	0.12043	0.168464	0.431694	0.238208	0	0.209059	0.118844	0.151099	0.252934	0.092348	0.013934	0.032428	0	0.25	0.165049	0.165049	0.183155	0.007207	0.044688	0.006547	0.522621	0.018617	0.378814	0.00142	0.036474	0.192635	0.152074	0.268919	0.602378	0.221267	0.105469
		15	0.045064	0.221024	0.244353	0.133127	0.109278	0.018315	0.00542	0.100548	0.196621	0.082915	0.061224	0.186364	0.054319	0.00887	0	0.337638	0.35914	0.268194	0.483607	0.574292	0.060241	0.205575	0.126338	0.157967	0.221643	0	0.29582	0.069238	0.245492	0.158019	0.128155	0.128155	0.096257	0	0.036678	0.052373	0.414977	0.037234	0.34322	0.122159	0.075228	0.095184	0.175115	0.12027	0.781374	0.213749	0.102865
		20	0.066524	0.272237	0.303901	0.077399	0.103093	0.080586	0.121951	0.045704	0.009217	0.231156	0.151927	0.209091	0.194123	0.03903	0.125874	0.062731	0.296774	0.149596	0.532787	0.399764	0.089501	0.188153	0.072805	0.318681	0.324641	0.153034	0.180064	0.027169	0.391123	0	0.04466	0.04466	0	0.084685	0.010961	0.057283	0.49298	0.03617	0.431356	0	0.058511	0.045892	0.144009	0.228378	0.690885	0.24812	0.25651
		25	0.113734	0.328841	0.067762	0.122291	0.113402	0.120879	0.084011	0.206581	0.162826	0.175879	0.068027	0.184091	0.040071	0.049083	0.149184	0.260148	0	0.256065	0.57377	0.616745	0.155766	0.202091	0.009636	0.299451	0.341591	0.118734	0.135048	0.100789	0.119279	0.311321	0.048544	0.048544	0.040107	0.030631	0.070826	0.037643	0.633385	0.059574	0.331356	0.191761	0.026596	0.082153	0.154378	0.141892	0.900925	0.108485	0.122396
		30	0.208155	0.202156	0	0.244582	0.138144	0	0.04336	0.124314	0.150538	0	0.192744	0.177273	0.030276	0	0.18648	0.064576	0.092473	0.257412	0.295082	0.553066	0.085198	0.303136	0.139186	0.592033	0.335072	0.197889	0.082529	0.090272	0.511789	0.21934	0.029126	0.029126	0.156417	0.102703	0.062395	0.013093	0.809672	0.081915	0.328814	0.090909	0.007599	0	0	0.174324	0.688243	0.220193	0.242188
		35	0.111588	0.221024	0.195072	0.122291	0.274227	0.172161	0.192412	0.173675	0.199693	0.130653	0.102041	0.097727	0.040962	0.046718	0.118881	0.04428	0.567742	0.229111	0.5	0.698113	0.173838	0.355401	0.157388	0.320055	0.268579	0.034301	0.210075	0.07362	0.48405	0.122642	0	0	0.156417	0.124324	0.056492	0.026187	0.558502	0.048936	0.619492	0.025568	0.106383	0.066856	0.006912	0.222973	0.755614	0.282492	0.059896
		40	0.156652	0.188679	0.256674	0.258514	0.068041	0.03663	0.124661	0.202925	0.119816	0.334171	0.172336	0.118182	0.165628	0.018924	0.144522	0.068266	0.780645	0.289757	0.47541	0.679245	0.110155	0.351916	0.035332	0.347527	0.109518	0.100264	0.093248	0.055215	0.288488	0.311321	0.102913	0.102913	0.181818	0.043243	0.047218	0.108838	0.230889	0	0.59322	0.078125	0	0.083853	0.157834	0	0.790621	0.161117	0.104167
		45	0.042918	0.142857	0.174538	0.346749	0.148454	0.029304	0.168022	0.206581	0.082949	0.492462	0.058957	0.132955	0.068566	0.012419	0.130536	0.094096	0.627957	0.152291	0.42623	0.474057	0.035284	0.292683	0.06531	0.456044	0.285528	0.047493	0.117899	0.086766	0.431345	0.132075	0.056311	0.056311	0.069519	0.082883	0.030354	0	0.837754	0.067553	0.541525	0.197443	0.129939	0.09745	0.201613	0.22973	0.844782	0.247046	0.253906
		50	0.169528	0.3531	0.258727	0.21517	0.051546	0.355311	0.298103	0.288848	0.144393	0.389447	0.351474	0.173864	0.437222	0.05618	0.282051	0.132841	0.989247	0.206199	0.210383	0.409198	0.037866	2.32056	0.056745	0.789835	0.152542	0.047493	0.237942	0.278703	2.53537	0.495283	0.031068	0.031068	0.15508	0.162162	0.163575	0.168576	0.432137	0.209043	5.33136	0.227273	0.100304	0.147875	0.137097	0.425676	0.21004	0.039742	0.126302
		55	0.255365	0.247978	0.728953	0.181115	0.230928	0.644689	0.398374	0.219378	0.144393	0.841709	0.113379	0.157955	0.365093	0.123004	0.568765	0.171587	0.722581	0.156334	0.314208	0.399764	0.114458	2.62369	0.103854	0.913462	0.196871	0.218997	0.277599	0.355828	2.89598	0.273585	0.100971	0.100971	0.205882	0.163964	0.147133	0.126023	0.299532	0.279255	4.62712	0.28125	0.145897	0.12068	0.062212	0.235135	0.155218	0.198711	0.144531
		60	0.660944	0.412399	0.36345	0.29257	0.146392	1.05861	0.289973	0.212066	0.113671	0.273869	0.208617	0.177273	0.47195	0.185098	0.529138	0.236162	0.898925	0.202156	0.322404	0.306604	0.051635	2.80139	0.200214	0.972527	0.22425	0.287599	0.290461	0.408414	2.4785	0.216981	0.128155	0.128155	0.085561	0.099099	0.18086	0.13257	0.24025	0.314894	5.65593	0.278409	0.081307	0.126912	0.12212	0.266216	0.125495	0.157895	0
		65	0.607296	0.142857	0.244353	0.165635	0.129897	0.919414	0	0.08958	0.271889	0.542714	0.437642	0.081818	0.617097	0.120047	0.393939	0.285978	0.888172	0.137466	0.363388	0.29717	0.064544	2.70035	0.307281	1.08791	0.122555	0.335092	0.182208	0.418931	2.08044	0.183962	0.130097	0.130097	0.196524	0.230631	0.142074	0.153846	0.205928	0.32234	5.33136	0.142045	0.103343	0.105949	0.141705	0.274324	0.054161	0.170784	0.204427
		70	0.725322	0.285714	0.361396	0.21517	0.181443	0.732601	0.227642	0.1883	0.176651	0.5	0.204082	0.138636	0.682102	0.148433	0.65035	0	1.42796	0.235849	0.122951	0.226415	0.153184	2.72474	0.3394	1.46154	0.189048	0.343008	0.123258	0.398773	2.94591	0.382075	0.066019	0.066019	0.15508	0.073874	0.194772	0.211129	0.528861	0.338298	6.30678	0.194602	0.147416	0.181303	0.135945	0.444595	0.202114	0.120301	0.117188
		75	0.873391	0.142857	0.501027	0.122291	0.216495	1.0696	0.341463	0.230347	0.179724	0.452261	0.260771	0.135227	0.651825	0.181549	0.48951	0.341328	1.20645	0.203504	0.251366	0.055425	0.072289	3.61673	0.361884	0.93544	0.286832	0.469657	0.247588	0.424189	3.0638	0.495283	0.194175	0.194175	0.159091	0.176577	0.108769	0.121931	0	0.420745	5.72288	0.40767	0.204407	0.2017	0.12788	0.5	0	0.203008	0.130208
		80	1.5279	0.342318	0.472279	0.272446	0.061856	1.12088	0.433604	0.213894	0.284178	0.615578	0.235828	0.267045	0.71772	0.277351	0.857809	0	1.85807	0.218329	0.275956	0.209906	0.181583	2.68293	0.460385	1.34753	0.100391	0.424802	0.173633	0.544259	3.45215	0.528302	0.363107	0.363107	0.18984	0.237838	0.193086	0.07856	0.656786	0.36117	6.37542	0.522727	0.146657	0.183003	0.414747	0.590541	0.206737	0.156821	0.041667
		85	1.21674	0.245283	0.271047	0.179567	0.230928	1.42125	0.395664	0.272395	0.264209	0.41206	0.226757	0.105682	0.88691	0.345358	0.995338	0.169742	1.43011	0.202156	0.193989	0.229953	0.160069	2.94774	0.547109	1.19231	0.215124	0.83905	0.403001	0.57844	2.91123	0.507075	0.254369	0.254369	0.080214	0.124324	0.065346	0.13257	0.425897	0.441489	6.4322	0.480114	0.037234	0.155241	0.324885	0.594595	0.155218	0.117078	0.286458
		90	1.50858	0.161725	0.36345	0.21517	0.189691	1.77656	0.252033	0.129799	0.073733	0.778894	0.136054	0.178409	0.749777	0.331756	1.0979	0.077491	1.48817	0.021563	0.185792	0.261792	0.166093	3.82927	0.635974	0.93956	0.148631	0.781003	0.374062	0.69851	3.20527	0.589623	0.291262	0.291262	0.185829	0.138739	0.105818	0.144026	0.204368	0.46383	6.99322	0.705966	0.25152	0.11898	0.489631	0.927027	0.175694	0.238453	0.308594
		95	1.3133	0.061995	0.414784	0.126935	0.317526	1.46886	0.466125	0	0.113671	0.369347	0.294785	0.102273	0.816563	0.367238	1.04895	0.321033	1.77204	0.167116	0.336066	0.288915	0.192771	3.90244	0.808351	1.26374	0.212516	0.675462	0.386924	0.659071	3.00971	0.540094	0.227184	0.227184	0.076203	0.187387	0.227234	0.104746	0.276131	0.662234	6.49491	0.786932	0.256079	0.130312	0.538018	0.955405	0.349406	0.142857	0.421875
		100	1.80472	0.280323	0.558522	0	0.263918	1.36264	0.371274	0.255941	0.145929	0.306533	0.346939	0.048864	0.841496	0.350089	1.3613	0.238007	1.52043	0.041779	0.243169	0.127358	0.10327	4.39024	0.779443	1.60714	0.246415	0.74934	0.465166	0.851884	3.07351	0.497642	0.347573	0.347573	0.259358	0.23964	0.113406	0.120295	0.418097	0.721809	6.78983	0.980114	0.205167	0.134844	0.641705	1.11216	0.32893	0.064447	0.31901
		105	1.60944	0.067385	0.50308	0.120743	0.379381	1.73993	0.195122	0.301645	0.238095	0.256281	0.147392	0.180682	1.05521	0.36783	1.19813	0.446494	2.13763	0.266846	0.314208	0.411557	0.041308	4.08711	0.964668	1.1511	0.404172	0.712401	0.39657	0.817704	3.14702	0.21934	0.425243	0.425243	0.371658	0.183784	0.110034	0.190671	0.138846	0.845213	7.04576	0.980114	0.287234	0.196034	0.710829	1.36351	0.455746	0.162191	0.449219
		110	1.65665	0.385445	0.583162	0.208978	0.536082	1.78388	0.360434	0.190128	0.192012	0.404523	0.22449	0.182955	0.977738	0.461266	1.46387	0.193727	2.13333	0.249326	0.204918	0.291274	0.184165	3.79094	0.872591	1.18681	0.336375	0.926121	0.3194	1.05522	2.9251	0.537736	0.182524	0.182524	0.21123	0.172973	0.115936	0.168576	0.592824	0.893085	7.23051	0.894886	0.256079	0.116147	0.571429	1.31622	0.44782	0.124597	0.255208
		115	2.12017	0.126685	0.398357	0.147059	0.34433	1.96703	0.506775	0.02011	0.162826	0.613065	0.244898	0.120455	1.29742	0.531047	1.54312	0.090406	1.53118	0.198113	0.144809	0.287736	0.086919	4.87108	1.26553	1.3022	0.14472	0.963061	0.392283	0.832603	3.35229	0.40566	0.27767	0.27767	0.322193	0.111712	0.1543	0.166121	0.218409	0.928191	7.26186	1.20454	0.405775	0.138244	0.870968	1.66757	0.393659	0.145005	0.4375
		120	2.53219	0.342318	0.572895	0.024768	0.435052	2.38095	0.384824	0.113346	0.142857	0.369347	0.21542	0.121591	1.30098	0.416913	1.46853	0.158672	2.24086	0.105121	0.172131	0.340802	0.172978	3.98258	1.47323	1.76236	0.229465	1.23219	0.351554	0.946538	3.63662	0.341981	0.464078	0.464078	0.467914	0.118919	0.084317	0.148118	0.430577	1.10372	7.66525	1.7429	0.282675	0.132011	1.01613	1.73784	0.499339	0.226638	0.31901
		125	2.35408	0	0.661191	0.216718	0.548454	2.5348	0.571816	0.096892	0.149002	0.40201	0.267574	0.171591	1.439	0.536369	1.51049	0.285978	2.41505	0.184636	0.322404	0.349057	0.143718	4.89895	1.34047	1.76923	0.275098	1.72296	0.368703	0.894829	3.63523	0.757075	0.324272	0.324272	0.557487	0.21982	0.11973	0.261047	0.163807	1.36543	7.68729	1.52273	0.449848	0.171671	1.01382	1.73378	0.456407	0.10956	0.367188
		130	2.51502	0.318059	0.585216	0.140867	0.402062	2.72527	0.444444	0.09872	0.142857	0.620603	0.188209	0.204545	1.43455	0.58427	1.37762	0.136531	2.70968	0.242588	0.453552	0.333726	0.241824	3.7108	1.46253	1.25275	0.166884	1.70449	0.360129	0.981595	3.09709	0.790094	0.417476	0.417476	0.518717	0.176577	0.128162	0.270867	0.085803	1.46383	7.90848	1.77983	0.414134	0.133144	1.08525	1.91487	0.583223	0.186896	0.494792
		135	2.62017	0.221024	0.478439	0.348297	0.645361	3.0989	0.680217	0.08958	0.115207	0.379397	0.045351	0.172727	1.50134	0.706682	1.58508	0.261993	2.38925	0.113208	0.07377	0.189858	0.179862	4.80488	1.31156	1.4011	0.384615	1.54881	0.377278	0.894829	3.75867	0.90566	0.545631	0.545631	0.938503	0.374775	0.176223	0.253682	0.936037	1.55479	8.10424	1.67614	0.396657	0.184703	0.990783	2.28649	0.746367	0.140709	0.355469
		140	2.92489	0.296496	0.605749	0.170279	0.540206	2.337	0.428184	0.100548	0.156682	0.454774	0	0	1.55031	0.585452	1.65734	0.332103	2.7914	0.136119	0.229508	0	0.090361	4.01394	1.72591	1.36264	0.187744	1.46966	0.512326	0.997371	3.70042	0.674528	0.396117	0.396117	0.783422	0.245045	0.165261	0.272504	0.589704	1.48936	8.45254	1.82812	0.379939	0.186969	1.17166	2.53108	0.662483	0.113856	0.648438
		145	2.72747	0.269542	0.753593	0.167183	0.771134	2.95604	0.880759	0.144424	0.192012	0.48995	0.1678	0.255682	1.63669	0.653459	1.74825	0.671587	2.81075	0.056604	0.224044	0.100236	0.269363	4.26132	1.73662	1.49588	0.075619	1.87863	0.425509	1.20421	4.02219	1.20283	0.852427	0.852427	0.870321	0.261261	0.134064	0.388707	0.647426	1.80266	8.59576	2.24006	0.481763	0.210198	1.27074	2.61216	0.873844	0.177229	0.602865
		150	3.16953	0.412399	0.899384	0.235294	0.661856	2.71062	0.867209	0.166362	0.175115	0.51005	0.192744	0.144318	1.52271	0.799527	1.83683	0.51107	2.77419	0	0.333333	0.128538	0.104131	5.38328	1.64026	1.29258	0.153846	1.93404	0.457663	1.11043	4.31068	1.17689	0.629126	0.629126	0.991979	0.371171	0.116779	0.319149	0.819033	1.73723	9.07034	2.26704	0.478723	0.237394	1.6394	2.64865	0.864597	0.172932	0.511719
		155	2.9485	0.296496	0.967146	0.318885	0.74433	3.49451	0.669377	0.226691	0.210445	0.396985	0.360544	0.098864	1.85663	0.876404	2.00932	0.824723	1.94193	0.102426	0.31694	0.494104	0.390706	4.64112	2.01392	1.27473	0.172099	1.85752	0.35477	1.16564	3.73093	1.14623	0.867961	0.867961	0.893048	0.281081	0.157673	0.370704	0.945398	1.94521	8.99492	2.21165	0.484802	0.307082	1.40668	2.58378	1.06803	0.165414	0.856771
		160	3.38197	0.056604	0.882957	0.171827	0.709278	2.9707	0.457995	0.106033	0.129032	0.673367	0.247166	0.109091	1.72306	0.781786	2.16317	0.791513	2.26022	0.234501	0.245902	0.40566	0.512909	4.86411	2.40257	1.375	0.340287	2.12929	0.332262	1.12182	3.71013	1.45047	0.984466	0.984466	1.06417	0.338739	0.171164	0.347791	0.315133	2.14894	8.49407	2.22727	0.519757	0.147309	1.55184	2.81487	0.998018	0.218045	0.74349
		165	3.40558	0.307278	1.06571	0.108359	0.676289	3.40659	0.658537	0.076782	0.147465	0.70603	0.090703	0.110227	1.63045	0.843288	2.13753	0.599631	2.39785	0.243935	0.374317	0.25	0.406196	4.78746	2.0803	1.37775	0.187744	2.37731	0.383708	1.11569	4.27878	1.29953	1.05437	1.05437	1.15508	0.398198	0.206577	0.410802	1.09828	2.19894	9.47288	2.64347	0.50152	0.227195	2.07028	3.18919	1.29524	0.085929	1.05208
		170	3.46137	0.204852	1.0924	0.363777	0.68866	3.91575	0.531165	0.215722	0.124424	0.354271	0.097506	0.168182	1.84684	1.02365	2.14452	0.904059	3.22581	0.181941	0.286885	0.295991	0.419966	5.31359	2.20557	1.33516	0.178618	2.01319	0.550911	1.11919	3.77254	1.20991	1.15146	1.15146	1.21123	0.455856	0.155143	0.43126	0.99532	2.23777	9.41271	2.64489	0.754559	0.236261	1.92051	3.20811	1.19815	0.19334	0.867188
		175	3.56009	0.175202	1.07187	0.289474	0.729897	4.06593	0.417344	0.164534	0.136713	0.60804	0.22449	0.092045	1.81567	1.03371	1.91142	0.404059	2.57419	0.109164	0.251366	0.228774	0.461274	6.00697	2.37794	1.68132	0.078227	2.43008	0.505895	1.00789	4.08599	1.62972	0.875728	0.875728	1.23931	0.558559	0.163575	0.503273	1.18253	2.52021	8.97712	2.53977	0.665653	0.147875	2.0553	3.14054	1.37384	0.11493	1.13411
		180	3.86266	0.107817	1.08624	0.198142	0.764948	3.76191	0.737127	0.177331	0.211982	0.384422	0.251701	0.203409	1.97061	1.09284	1.76224	0.808118	2.88172	0.349057	0.314208	0.293632	0.679862	5.80139	2.46467	1.47115	0.195567	2.36412	0.483387	1.36985	4.05825	1.75	1.1301	1.1301	1.35963	0.751351	0.201096	0.477905	0.950078	2.42553	9.06441	2.64489	0.559271	0.218697	2.71083	3.34189	1.32695	0.174006	1.23698
		185	3.41202	0.207547	1.34702	0.190402	0.738144	3.72894	0.720867	0.20841	0.145929	0.733668	0.145125	0.107955	1.81745	1.16203	2.18182	0.784133	3.09247	0.231806	0.185792	0.338443	0.672117	5.78397	2.63062	1.2445	0.275098	2.41953	0.501608	1.46275	3.9154	1.71698	0.914563	0.914563	1.45454	0.562162	0.223019	0.619476	1.18565	2.67181	8.83051	3.01562	0.62386	0.26119	2.07028	4.16622	1.4465	0.093448	1.29688
		190	3.44421	0.153639	1.55647	0.174923	1.15464	4.32234	0.747967	0.244973	0.095238	0.492462	0.181406	0.071591	2.0837	1.28504	2.32168	0.950185	2.81505	0.125337	0.270492	0.323113	0.660929	5.90941	2.22698	1.34066	0.131682	2.96042	0.438371	1.51709	4.24272	1.62028	1.27767	1.27767	1.70321	0.520721	0.249578	0.586743	1.04368	2.7617	9.56695	3.37074	0.800912	0.173371	2.29032	3.66892	1.52444	0.137487	1.4401
		195	4.19742	0	1.04928	0.275542	0.746392	4.20513	0.517615	0.232176	0.158218	0.763819	0.21542	0.119318	2.18611	1.28149	2.10489	0.929889	2.89247	0.367925	0.459016	0.383255	0.714286	5.7108	2.72591	1.64698	0.255541	2.46438	0.608789	1.39001	4.34258	1.82311	1.2835	1.2835	1.91845	1.2	0.223019	0.788871	1.36193	2.86596	10.0415	2.92188	0.556231	0.296884	2.2765	4.01487	1.50793	0.06015	1.46875
		200	3.76824	0.207547	1.41273	0.241486	0.841237	3.93407	0.560976	0.195612	0.109063	0.718593	0.240363	0.156818	2.17542	1.12241	2.28904	0.911439	2.8043	0.28841	0.275956	0.042453	0.820998	5.98258	2.73019	1.52473	0.15515	2.7942	0.646302	1.19895	4.19834	1.56604	1.24272	1.24272	1.74198	0.911712	0.122681	0.745499	1.37441	2.75745	9.84407	3.22301	0.646657	0.226629	2.06336	4.36081	1.6288	0.135338	1.53385
		205	3.87125	0.188679	1.90965	0.260062	1.06598	4.18315	0.596206	0.115174	0.21659	0.48995	0.326531	0.145455	2.02315	1.14015	2.24476	0.869004	3.47527	0.231806	0.31694	0.133255	0.847676	5.67596	2.65311	1.63461	0.21382	2.94987	0.655949	1.48116	4.48682	1.89387	1.59417	1.59417	1.67513	1.26667	0.178752	0.801146	1.30265	3.21489	9.98475	3.23864	0.771277	0.160907	2.54608	4.73513	1.61163	0.200859	1.72135
		210	3.67382	0.218329	1.86242	0.273994	1.13402	4.08791	0.655827	0.223035	0.144393	0.680905	0.29932	0.104545	2.04808	1.24601	2.38228	1.14022	3.18925	0.138814	0.237705	0.179245	0.758176	6.18815	2.70128	1.54396	0.168188	2.65435	0.66881	1.2638	4.52982	1.83019	1.37864	1.37864	1.94118	1.24685	0.20742	0.99018	1.46802	3.08936	10.1102	3.16193	0.764438	0.14051	2.44355	4.60811	1.74703	0.094522	2.24089
		215	4.1309	0.3531	1.95893	0.335913	1.08247	4.27839	0.647696	0.16819	0.105991	0.680905	0.251701	0.144318	2.03117	1.34772	2.53613	1.15314	2.42796	0.09973	0.254098	0.23467	0.950947	5.3554	3.01927	1.3956	0.322034	2.64908	0.610932	1.45223	4.50347	1.96226	1.27573	1.27573	2.00401	1.20541	0.239882	0.837971	1.62247	3.0984	10.0161	3.00994	0.660334	0.156941	2.74193	4.81351	1.74307	0.126745	1.95833
		220	4.41845	0.19407	1.81109	0.229102	0.94433	4.16484	0.785908	0.122486	0.221198	0.422111	0.333333	0.157955	2.03117	1.35009	2.4662	0.780443	3.54409	0.157682	0.240437	0.363208	0.962134	5.32056	2.89722	1.30769	0.239896	2.90765	0.575563	1.59685	4.00277	1.87972	1.44272	1.44272	2.2861	1.58559	0.318297	0.932079	1.92512	3.44043	9.87119	3.09943	0.719605	0.213031	2.4447	4.82568	1.79062	0.103115	2.10547
		225	4.00215	0.415094	2.23614	0.176471	1.34639	5.35531	0.888889	0.082267	0.049155	0.482412	0.356009	0.143182	2.08816	1.37552	2.2028	1.17528	3.34624	0.180593	0.464481	0.090802	1.0525	6.05227	2.90578	1.56181	0.301173	2.74143	0.439443	1.51884	4.52427	2.23585	1.4835	1.4835	2.4492	1.73874	0.185919	1.16203	1.82215	3.32819	10.4797	3.33239	0.806991	0.132011	2.51843	4.83514	2.08785	0.10956	2.64062
		230	4.23391	0.188679	2.01437	0.188854	1.14021	4.3956	0.95935	0.08958	0.176651	0.243719	0.181406	0.179545	2.28762	1.39444	2.14918	1.0572	3.06237	0.239892	0.256831	0.255896	1.03356	5.63066	2.89615	1.75275	0.308996	3.31662	0.687031	1.39527	4.66019	2.38915	1.6699	1.6699	2.50936	1.5982	0.353288	1.24386	1.4415	3.57766	10.589	3.70028	0.860942	0.190368	2.45852	5.0446	2.01783	0.090226	2.29167
		235	4.09657	0.285714	1.75975	0.280186	1.1567	4.46154	0.615176	0.062157	0.168971	0.761307	0.31746	0.153409	2.00623	1.47842	2.33566	1.08487	3.43871	0.246631	0.15847	0.206368	1.15577	5.22648	3.03533	1.60714	0.269883	2.87599	0.416935	1.40228	4.44522	2.29953	1.59806	1.59806	2.61364	1.78739	0.210793	1.39198	1.73947	3.61011	11.0161	3.52841	0.93541	0.161473	2.85254	5.27838	1.96764	0.10956	2.53906
		240	4.60086	0.091644	2.06365	0.219814	1.11753	4.32234	0.707317	0.153565	0.102919	0.497487	0.267574	0.139773	2.45058	1.60083	2.17482	1.78598	3.86237	0.257412	0.147541	0.334906	1.38812	6.30662	4.0546	1.39973	0.482399	3.79156	0.526259	1.24715	5.16505	2.35849	1.59223	1.59223	2.62032	1.97477	0.328415	1.22504	2.23245	3.76011	10.6517	3.87074	0.906535	0.10255	2.83986	5.56487	2.14795	0.079484	2.42578
		245	4.77039	0.16442	2.3347	0.171827	0.88866	4.98535	0.815718	0.195612	0.190476	0.560302	0.353741	0.004545	2.36598	1.49379	2.48485	1.86162	3.32473	0.109164	0.251366	0.386792	1.3537	5.05575	3.81478	1.67995	0.405476	3.38786	0.510182	1.42156	5.30236	2.37736	1.6466	1.6466	2.78476	1.87027	0.298482	1.68249	2.16537	3.8266	11.1924	3.65057	0.863222	0.168272	2.7477	5.77568	2.01123	0.103115	2.53776
		250	4.87768	0.315364	2.50513	0.153251	1.16289	5.02198	0.490515	0.180987	0.136713	0.701005	0.208617	0.244318	2.44791	1.60083	2.55944	1.5	3.52043	0.233154	0.568306	0.222877	1.50258	6.07665	3.45396	1.39423	0.547588	3.75198	0.545552	1.4908	4.38974	2.78302	2	2	2.73396	2.1009	0.3457	1.51228	2.5273	4.18777	11.0195	3.72301	0.857143	0.160907	2.99424	5.69189	2.11559	0.225564	2.60938
		255	4.66094	0.175202	2.16427	0.26161	1.33608	5.40293	0.897019	0.073126	0.156682	0.726131	0.412698	0.081818	2.77204	1.77765	2.72028	1.61808	3.15914	0.34097	0.36612	0.225236	1.66695	6.01045	3.80193	1.3805	0.410691	4.07124	0.670954	1.45662	4.25798	2.36321	1.90874	1.90874	2.91444	2.42523	0.317454	1.50164	1.9064	3.83936	10.622	4.23011	1.14134	0.243059	3.27074	5.46351	2.40555	0.136412	2.75
		260	5.07725	0.280323	2.3963	0.227554	1.00825	5.41392	0.802168	0.215722	0.162826	0.48995	0.412698	0.129545	2.49599	1.77232	2.4289	2.05351	3.33118	0.250674	0.393443	0.428066	1.74355	6.02439	3.8833	1.33654	0.421121	3.86544	0.729904	1.56354	5.06657	2.37736	1.6932	1.6932	3.1377	2.23604	0.287943	1.69231	2.48986	4.08989	11.2949	3.72869	0.8731	0.217564	3.05069	5.8973	2.17305	0.120301	2.95964
		265	4.71674	0.19407	2.54415	0.219814	0.698969	4.99634	0.902439	0.074954	0.301075	0.522613	0.24263	0.132955	2.60463	1.76405	2.75991	1.87823	3.52043	0.238544	0.196721	0.259434	1.56282	6.64112	3.98073	1.36264	0.34811	3.62533	0.621651	1.65644	4.93065	3.1533	1.91456	1.91456	3.0508	2.72973	0.347386	1.78151	2.16849	3.87872	11.4076	4.30966	0.970365	0.065156	3.21774	6.4946	2.2893	0.132116	2.8776
		270	4.87768	0.256065	2.55031	0.184211	1.06598	4.97436	0.487805	0.16819	0.282642	1.14824	0.487528	0.143182	2.51914	1.93318	2.88811	1.52029	3.94193	0.183288	0.439891	0.341981	1.67814	5.98258	3.92827	1.50961	0.35854	3.48021	0.500536	1.57406	4.72677	2.58726	1.71845	1.71845	3.48396	2.11712	0.315346	1.7234	2.5195	4.30053	11.6008	4.09517	1.0152	0.228329	3.12788	6.19459	2.52048	0.195489	2.91536
		275	4.49356	0.156334	2.9384	0.103715	1.12371	5.44322	0.902439	0.206581	0.167435	0.5	0.632653	0.186364	2.28762	1.75991	2.48485	1.68266	3.55054	0.140162	0.379781	0.415094	1.83305	5.66899	3.9561	1.28297	0.316819	4.11346	0.539121	1.52761	4.69903	2.95991	1.88349	1.88349	3.22059	2.67568	0.383642	1.94108	1.79875	4.4133	11.7076	4.23295	1.05623	0.186402	3.87097	6.71081	2.57596	0.12782	3.28255
		280	5.00429	0.264151	3.03285	0.263158	1.32784	5.75092	0.574526	0.159049	0.233487	0.623116	0.780045	0.102273	2.29831	2.05441	2.56643	1.96494	3.93118	0.392183	0.226776	0.489387	1.77195	7.4007	4.42827	1.38736	0.277705	3.50923	0.596999	1.41192	4.92788	3.42453	1.74175	1.74175	3.65909	2.54054	0.346121	1.91735	2.43058	4.52234	11.8958	4.41761	0.931611	0.184703	3.79839	6.80135	2.63342	0.154672	3.58333
		285	4.81116	0.309973	2.79261	0.26161	1	4.98168	0.861789	0.129799	0.253456	0.778894	0.44898	0.095455	2.68388	2.04494	2.33566	2.10517	3.63011	0.293801	0.177596	0.402123	1.69191	6.22648	4.19593	1.28159	0.237288	3.40633	0.634512	1.58107	5.37032	3.78302	1.82913	1.82913	3.4385	2.64324	0.391653	2.16858	3.00312	4.45904	11.7195	4.00426	1.03951	0.253824	3.85023	6.94324	2.55614	0.12782	3.71615
		290	5.08798	0.161725	2.79671	0.405573	1.06598	4.8315	0.96748	0.297989	0.296467	0.869347	0.44898	0.245455	2.74889	2.10881	3.02564	1.66605	4.2043	0.237197	0.295082	0.192217	1.89587	7.5784	4.24946	1.47253	0.346806	3.4934	0.526259	1.46275	5.22469	3.37972	1.92233	1.92233	4.1377	2.82162	0.359191	2.41899	3.00156	4.25053	11.5042	4.57955	1.41413	0.239093	3.52304	7.21892	2.76288	0.164339	3.51823
		295	5.10944	0.210243	2.86448	0.281734	1.31753	6.38462	0.710027	0.131627	0.145929	0.502513	0.569161	0.190909	2.74444	2.07747	2.7366	1.96125	3.70107	0.080863	0.172131	0.40566	1.64802	6.87805	4.34154	1.13324	0.314211	3.77309	0.677385	1.70026	5.18447	3.09198	2.11068	2.11068	3.59626	2.62522	0.413153	2.09984	3.19969	4.25745	12.0737	4.92898	1.37614	0.301416	3.68894	6.9946	2.85007	0.152524	3.8099
		300	4.60086	0.331536	3.37577	0.196594	1.3134	5.1685	0.840108	0.215722	0.162826	0.668342	0.514739	0.142045	2.36955	2.17682	2.42191	1.87823	3.75699	0.339623	0.319672	0.380896	2.10069	6.54355	4.74304	1.4533	0.191656	3.54881	0.784566	1.51797	5.48682	3.26887	2.11068	2.11068	4.04278	3.58018	0.373103	2.03519	2.71763	4.49308	12.2076	4.78835	1.14514	0.260623	3.94124	7.01757	3.01387	0.132116	3.69922
		305	4.84335	0.420485	3.41889	0.334365	1.31753	5.57509	0.737127	0.265082	0.138249	0.457286	0.761905	0.265909	2.76848	2.19574	3.19114	2.20111	3.63441	0.250674	0.237705	0.376179	2.03012	6.09059	4.91542	1.6195	0.410691	3.8153	0.560557	1.42945	5.69209	3.79009	2.09709	2.09709	3.73262	2.98378	0.500843	2.3347	3.52886	4.47074	11.8746	5.11932	1.3579	0.214164	4.09101	7.45946	3.00132	0.121375	3.76172
		310	5.35837	0.212938	3.07803	0.210526	0.886598	5.42124	0.682927	0.122486	0.262673	0.693467	0.716553	0.232955	2.6732	2.24187	2.73427	1.88376	3.8043	0.261456	0.363388	0.317217	2.13167	7.30314	5.07602	1.3805	0.25163	3.80739	0.576635	1.54338	5.84466	4.17217	2.33981	2.33981	4.18048	2.81982	0.497892	2.31915	3.04212	4.59309	12.4712	5.05398	1.19757	0.236261	3.99424	7.34324	3.05548	0.065521	3.97917
		315	5.19742	0.210243	3.21561	0.235294	1.01031	6.08425	0.758808	0.197441	0.150538	0.907035	0.77551	0.202273	2.52805	2.2673	2.90676	2.59963	3.8172	0.374663	0.095628	0.564858	2.22547	7.45645	5.303	1.11401	0.209909	3.90765	0.44373	1.461	5.23994	3.85613	1.86019	1.86019	4.15642	3.74595	0.419899	2.2635	4.0468	4.60745	12.9407	5.14489	1.3921	0.222663	4.31567	7.62432	3.24505	0.108485	4.0638
		320	5.40987	0.118598	4.01027	0.252322	1.21031	5.98535	0.726287	0.144424	0.093702	0.620603	0.979592	0.140909	2.43722	2.0757	2.75991	1.62177	3.8129	0.152291	0.20765	0.028302	1.94578	7.18815	4.52998	1.28571	0.302477	3.59367	0.747053	1.33041	4.97781	4.04953	2.46796	2.46796	4.33021	3.4955	0.4414	2.4689	3.22933	4.64468	12.5314	5.21591	1.38298	0.169972	4.11175	7.67027	3.34214	0.18797	3.84505
		325	5.30258	0.191375	3.77618	0.239938	1.23093	5.663	0.682927	0.180987	0.242704	0.61809	1.07029	0.065909	2.61175	2.30928	2.5711	2.27491	3.93118	0.307278	0.120219	0.537736	2.50689	7.03833	5.09101	1.35714	0.205997	4.09499	0.424437	1.42244	5.61859	3.87736	2.42136	2.42136	4.34091	3.42883	0.418212	2.69394	3.79251	4.64734	12.7297	5.23864	1.29179	0.128045	4.1129	8.12297	3.33752	0.137487	4.59245
		330	5.76609	0.239892	3.34497	0.410217	1.28247	5.95604	0.921409	0.182815	0.285714	0.535176	1.17007	0.189773	2.52627	2.1573	2.82518	2.75646	3.94409	0.063342	0.265027	0.258255	2.33219	8.05923	5.34582	1.74863	0.370274	4.16359	0.523044	1.45399	5.56727	4.7217	2.21748	2.21748	4.49465	3.58919	0.434233	2.60066	3.74259	4.74575	13.5517	5.47159	1.26748	0.143343	3.71198	7.97297	3.5066	0.097744	4.2474
		335	4.99785	0.250674	4.17659	0.278638	1.30309	6.27473	0.701897	0.281536	0.182796	0.537688	1.32653	0.063636	2.67498	2.10467	2.78788	2.6476	4.04301	0.138814	0.213115	0.331368	2.54045	6.84321	5.18201	1.21154	0.413299	4.87863	0.593783	1.42419	5.60333	3.98349	2.5165	2.5165	4.40241	4.03243	0.434233	2.6252	3.8674	4.79468	12.3449	5.53409	1.54711	0.144476	4.15668	7.64865	3.67305	0.066595	4.31771
		340	5.04506	0.110512	4.10472	0.173375	1.26186	6.34066	0.875339	0.204753	0.202765	0.459799	1.322	0.176136	2.43989	2.26907	2.58508	2.59041	3.89893	0.423181	0.125683	0.517689	2.41738	7.43902	5.41221	1.05769	0.292047	4.30343	0.578778	1.16564	5.74896	4.31604	2.16117	2.16117	4.59759	3.48649	0.54258	2.49591	3.58814	4.79096	12.7559	5.82812	1.5266	0.233428	4.48157	8.23649	3.67635	0.081633	4.72917
		345	4.93348	0.196765	3.99179	0.295666	1.39588	6.50183	0.647696	0.135283	0.248848	0.721106	1.39909	0.186364	2.44346	2.44589	3.28904	2.70664	3.93763	0.125337	0.346995	0.456368	2.64974	7.47387	5.57602	1.2555	0.34811	4.70712	0.672026	1.53725	5.62136	4.63443	1.89903	1.89903	4.73529	3.27027	0.418212	2.74223	3.91264	4.63351	12.7975	5.45028	1.57751	0.167139	4.53802	8.65541	3.68692	0.205156	4.83854
		350	5.33047	0.15903	4.25051	0.157895	1.30103	7.05495	0.761518	0.133455	0.225806	0.550251	1.43764	0.122727	2.48531	2.33057	2.75524	2.34133	4.29032	0.246631	0	0.424528	2.51377	7.43206	5.14668	1.00275	0	4.13984	0.580922	1.40315	5.41193	4.45755	2.32816	2.32816	4.32754	3.8036	0.499157	2.88707	4.11857	5.00319	13.1576	5.75994	1.66033	0.175071	4.78917	8.34324	3.68032	0.132116	4.73958
		355	5.34549	0.264151	4.18275	0.168731	1.26804	5.61905	0.764228	0.14808	0.164363	0.809045	1.64172	0.189773	2.23597	2.5683	2.6993	2.71956	4.13763	0.231806	0.213115	0.399764	2.90189	8.26829	5.65311	1.55769	0.302477	3.96834	0.663451	1.18317	5.59639	4.96462	2.45437	2.45437	4.72326	3.9009	0.493676	2.9419	4.29329	4.91702	12.7271	5.76705	1.43921	0.226629	4.39631	8.57027	3.78203	0.093448	4.78646
		360	5.3133	0.221024	3.9076	0.289474	1.2165	5.57876	0.934959	0.171846	0.231951	0.298995	1.95918	0.1	2.36509	2.27735	3.18415	2.49816	4.19785	0.214286	0.163934	0.438679	2.89845	7.43206	5.88544	1.48489	0.264668	4.24011	0.53269	1.33655	5.70319	4.15094	2.60388	2.60388	5.373	4.07387	0.440556	2.90589	4.47894	5.0617	12.8551	5.66761	1.45669	0.175071	4.70507	8.58243	3.96896	0.097744	5.14713
		365	5.19957	0.12938	4.38809	0.250774	1.28247	7.67766	0.495935	0.16819	0.159754	0.497487	1.6576	0.056818	2.41318	2.51153	2.95338	2.83579	4.16129	0.320755	0.185792	0.288915	2.43029	7.52613	5.80835	1.56044	0.342894	4.53562	0.480171	1.4014	5.83356	5.05424	2.6	2.6	4.97594	3.83604	0.537521	2.73568	4.28549	5.16968	12.7348	6.25284	1.61322	0.094051	4.60945	8.83513	3.90291	0.039742	4.98568
		370	6.00429	0.234501	4.54209	0.280186	1.3835	7.05128	0.98103	0.162706	0.030722	0.874372	1.65306	0.172727	2.5699	2.44589	2.6993	2.91144	4.19355	0.359838	0.245902	0.48467	2.80551	7.59233	5.50107	1.53571	0.183833	4.52243	0.723473	1.27344	5.83356	4.9434	2.41748	2.41748	5.14973	3.98018	0.594013	2.89444	4.79719	5.18245	12.6763	6.4929	1.69073	0.146742	4.83064	8.79595	4.14003	0.181525	5.08724
		375	5.07725	0.350404	4.50513	0.297214	1.17732	6.05128	0.666667	0.124314	0.147465	0.61809	1.9161	0.090909	2.72841	2.5754	2.7669	3.0572	4.26667	0.161725	0.314208	0.40684	2.97935	7.97909	5.80728	1.51648	0.26206	3.79947	0.586281	1.51008	5.21637	4.86792	2.3165	2.3165	5.44652	4.05225	0.60371	3.01227	4.69267	5.32553	13.4178	6.35227	1.60182	0.196034	4.60369	8.87838	3.96764	0.070892	5.48568
		380	5.91631	0.296496	4.45174	0.376161	1.32784	7.15751	0.685637	0.124314	0.105991	0.628141	1.99093	0.153409	2.44257	2.4518	3.31468	2.99262	4.85376	0.289757	0.139344	0.420991	2.95697	7.96864	6	1.41621	0.277705	3.87599	0.557342	1.27607	5.71567	5.03066	2.13204	2.13204	5.31818	4.33694	0.646712	3.32651	4.76911	5.01702	13.3848	6.28835	1.63146	0.184136	4.79493	9.31757	4.06407	0.129968	5.10547
		385	5.32618	0	4.39425	0.247678	1.11753	7.63736	0.96748	0.129799	0.207373	0.520101	1.88209	0.082955	2.70614	3.07392	2.83683	2.99262	4.63226	0.347709	0.079235	0.545991	3.26334	7.60279	6.12848	1.43269	0.3103	3.89446	0.599143	1.38475	6.27601	4.99528	2.53981	2.53981	5.50668	3.8018	0.588111	3.22504	4.51482	5.1133	13.0475	6.00568	1.66869	0.10085	4.48157	9.22568	4.02576	0.059076	5.08203
		390	5.50858	0.180593	4.36756	0.273994	1.26392	7.20513	0.417344	0.215722	0.164363	0.472362	2.00454	0.165909	2.44702	2.77232	3.01865	2.98893	5.05591	0.285714	0.180328	0.582547	2.67986	7.90592	6.50964	1.81868	0.47588	4.53034	0.524116	1.34531	5.76006	5.12028	2.38835	2.38835	5.18048	4.45405	0.583895	3.02128	4.59906	4.99255	12.7059	6.49574	1.65501	0.096884	5.197	9.40405	4.28996	0.111708	5.14713
		395	6.42489	0.277628	4.84189	0.354489	1.20619	7.21612	0.788618	0.182815	0.228879	0.683417	2.01134	0.154545	2.56456	2.81904	3.38928	3.09963	4.80215	0.328841	0.057377	0.438679	2.89329	7.87805	6.08887	1.29808	0.346806	3.84433	0.605573	1.17528	6.35229	5.56132	2.3165	2.3165	5.41043	4.28829	0.624368	3.42062	4.55382	5.51702	13.122	6.74574	1.70061	0.114448	5.37327	9.91351	4.45376	0.183673	5.66146
		400	5.33691	0.328841	4.35729	0.455108	1.21856	7.82418	0.899729	0.319927	0.187404	0.527638	2.17914	0.245455	2.82725	2.74512	2.84615	3.14022	5.08172	0.450135	0.229508	0.483491	3.2358	8.69686	6.36296	1.5	0.226858	4.00264	0.531618	1.2752	6.02635	5.55424	2.55922	2.55922	5.59492	4.69189	0.528246	3.26923	4.80187	5.1383	13.7619	6.00142	1.57295	0.090085	5.23733	9.75676	4.22655	0.194415	5.44792
		405	5.41845	0.269542	4.66324	0.28483	1.20206	7.43223	0.98916	0.122486	0.107527	0.811558	2.08617	0.204545	2.7756	2.77942	3.16783	2.95941	4.05591	0.256065	0.36612	0.435142	2.90878	7.41463	5.51285	1.32418	0.194263	3.73879	0.762058	1.21297	5.74064	5.80896	2.76505	2.76505	5.46123	3.92973	0.617622	3.44926	5.34321	5.42606	13.7551	6.68466	1.53495	0.14221	5.38134	9.45676	4.33818	0.118153	5.22396
		410	5.22532	0.226415	5.10062	0.196594	1.00206	7.38095	0.818428	0.180987	0.199693	0.718593	2.45125	0.164773	2.73731	2.94678	2.87413	3.27491	4.9828	0.316712	0.106557	0.211085	3.28141	8.09059	6.18522	1.15797	0.190352	4.22955	0.655949	0.91411	6.43412	5.41509	2.28155	2.28155	5.83556	4.5027	0.589376	3.48363	5.65991	5.2984	13.7898	7.03125	1.87842	0.115581	5.40668	9.82297	4.59115	0.128894	5.60417
		415	5.66738	0.285714	4.83573	0.227554	1.3835	7.76923	0.796748	0.159049	0.231951	0.829146	2.07483	0.2125	2.85485	2.68717	3.11888	3.33948	4.75484	0.382749	0.333333	0.365566	3.0852	8.19164	6.76874	1.64011	0.178618	4.38786	0.574491	1.0447	5.99861	5.20755	2.49903	2.49903	5.82754	4.77117	0.615093	3.19722	5.28081	5.45638	13.4153	6.98011	1.79103	0.083853	5.29148	9.82162	4.3996	0.121375	6.2526
		420	6.19957	0.172507	5.02259	0.320433	1.24124	7.79854	0.756098	0.11883	0.16129	0.439698	2.8322	0.340909	2.57168	2.97694	3.48485	3.41144	5.55699	0.510782	0.163934	0.462264	3.40534	8.42509	7.02998	1.42582	0.336375	4.02902	0.531618	0.878177	5.95562	5.95991	2.27379	2.27379	6.05214	4.93513	0.601602	3.55237	5.23869	5.45425	13.0559	7.16903	1.8883	0.12068	5.6659	9.9973	4.59775	0	5.69792
		425	5.27897	0.366577	5.29158	0.379257	1.0701	7.04396	0.691057	0.221207	0.043011	0.811558	2.46032	0.228409	2.4764	2.93909	3.29371	3.08303	4.94624	0.246631	0.155738	0.377358	3.37263	8.47387	6.91435	1.22253	0.091265	4.81266	0.689175	0.928133	6.2982	6.05424	2.54175	2.54175	6.35294	5.03964	0.589376	3.5671	5.53042	5.41383	13.2398	6.99432	2.03267	0.111615	6.07489	10.3432	4.49339	0.135338	6.04297
		430	5.59227	0.377358	5.40862	0.328173	1.37732	6.93773	0.856369	0.186472	0.121352	0.39196	2.5737	0.406818	2.5423	2.9728	3.0303	3.06273	4.75269	0.269542	0.34153	0.496462	3.4432	8.87456	6.78266	1.2445	0.509778	3.64644	0.740622	1.00263	6.02774	6.61557	2.47961	2.47961	6.0508	4.9009	0.582209	3.60638	5.70827	5.46862	14.3025	6.76847	1.94529	0.121813	6.07373	10.8486	5.08653	0.15145	6.47917
		435	6.04077	0.450135	5.30595	0.329721	1.16289	8.11722	0.837398	0.173675	0.130568	0.680905	3.01587	0.502273	2.60374	3.01183	3.69697	3.07749	5.25807	0.377358	0.322404	0.576651	3.20826	8.77004	6.74411	1.18956	0.238592	3.87599	0.650589	1.03243	6.30236	5.75708	2.6	2.6	6.37834	5.62342	0.56914	3.68003	5.70359	5.56915	14.3203	6.91619	1.82067	0.154674	6.5	10.6446	4.56077	0.136412	6.1862
		440	5.90987	0.48248	5.75565	0.359133	1.48247	7.40293	0.926829	0.153565	0.231951	0.613065	2.95465	0.553409	2.48798	2.8764	3.67599	3.42989	5.36989	0.362534	0.322404	0.510613	3.51033	9.73519	6.96681	1.70055	0.185137	3.69393	0.558414	0.808063	7.17892	5.74764	2.46602	2.46602	5.51337	5.27748	0.771922	3.69313	5.83151	5.40532	13.428	7.34091	1.76748	0.125779	6.42511	10.9419	5.072	0.155747	6.34766
		445	6.23605	0.315364	5.55647	0.24613	1.65567	7.92674	0.848238	0.310786	0.170507	0.48995	3.10431	0.582955	2.61443	2.99763	3.62937	3.61993	4.96559	0.257412	0.31694	0.549528	3.56885	8.79443	7.09422	1.66896	0.308996	4.08179	0.546624	0.824715	6.49515	6.20047	2.65437	2.65437	6.38102	5.01441	0.56914	3.46972	5.75819	5.71489	13.8297	6.93182	1.86778	0.143909	5.76498	11.2149	4.63276	0.077336	6.23698
		450	5.80901	0.555256	5.74538	0.315789	1.42268	8.30769	1.0542	0.109689	0.233487	0.668342	2.91156	0.623864	2.58949	2.89001	3.54779	2.86716	5.49892	0.280323	0.215847	0.326651	3.55077	9.24739	7.10814	1.71154	0.279009	3.91557	0.478028	1.06924	5.95146	6.25943	2.72427	2.72427	6.27941	5.2036	0.577572	3.65794	5.54914	5.49787	14.4076	7.75142	1.9848	0.149575	6.06682	11.2878	5.12021	0.122449	6.13281
		455	5.90558	0.45283	5.90144	0.414861	1.29897	8.41026	0.623306	0.149909	0.248848	0.633166	3.32426	0.701136	2.6545	3.01774	3.21445	2.99816	5.31613	0.32345	0.224044	0.365566	3.42943	9.33798	6.90364	1.4478	0.276402	3.5409	0.609861	0.970202	6.26352	6.19104	2.50485	2.50485	6.377	5.26487	0.549747	3.78805	5.88612	5.53989	13.6297	7.15483	1.8503	0.086119	6.41129	11.2946	4.98877	0.146079	6.33073
		460	5.91631	0.501348	6.1499	0.396285	1.30103	9.28938	0.788618	0.250457	0.089094	0.758794	3.34014	0.804545	2.66429	2.97221	3.42657	3.16421	5.84731	0.198113	0.404372	0.439858	3.25645	8.89896	6.29122	1.53984	0.26206	4.27705	0.572347	0.761613	7.26768	6.27594	2.45825	2.45825	6.28476	5.11892	0.453204	3.68576	6.67083	5.75798	14.0881	7.37074	1.83587	0.078187	6.84101	11.4392	5.0033	0.168636	6.67057
		465	5.37983	0.126685	5.83162	0.458204	1.23093	8.14286	0.699187	0.122486	0.096774	0.801508	3.9297	0.897727	2.26091	3.22176	3.61305	3.15498	5.29677	0.371968	0.150273	0.694575	3.55336	9.93728	6.86403	1.65522	0.307692	3.88127	0.617363	0.800175	6.09015	6.13443	2.55534	2.55534	6.68182	5.48829	0.553541	3.53355	5.87676	5.42394	13.5237	7.56392	1.92021	0.121246	6.45968	11.273	5.07728	0.180451	6.57943
		470	5.97425	0.261456	5.93429	0.20743	0.985567	8.79487	0.731707	0.16819	0.113671	0.487437	3.15873	0.961364	2.64381	3.28267	3.85781	3.23985	5.8	0.349057	0.346995	0.54717	3.63769	9.65157	7.15846	1.51511	0.350717	3.99208	0.624866	0.917616	7.17753	6.04009	2.5068	2.5068	5.85695	5.68649	0.526981	3.82079	6.23401	5.58883	13.6941	7.52841	1.88982	0.103683	6.57373	11.4257	5.13012	0.156821	6.68229
		475	5.80901	0.447439	6.13347	0.487616	1.21443	9.03663	0.867209	0.244973	0.018433	0.79397	2.98866	1.18636	2.87711	3.34477	3.73194	3.48155	5.13763	0.420485	0.273224	0.632075	3.55766	9.75958	6.7591	1.43681	0.279009	3.64116	0.57985	0.886941	6.9154	6.37972	3.00583	3.00583	6.55749	5.61622	0.536678	3.6653	6.11232	5.71968	13.9712	7.44602	1.78419	0.098017	6.90092	11.7095	5.45773	0.135338	7.00912
		480	5.45494	0.361186	6.32444	0.243034	1.19175	8.1685	0.772358	0.16819	0.099846	0.821608	3.48073	1.21364	2.74444	3.26789	3.70629	3.35609	5.17634	0.432615	0.273224	0.597877	3.53012	9.08014	7.01178	1.44505	0.335072	3.62533	0.578778	0.834356	6.99584	6.99528	2.80583	2.80583	6.12968	5.80721	0.478921	3.94844	6.62402	5.89734	13.9898	7.60653	1.84423	0.13711	6.60484	12.1703	5.41149	0.171858	6.6849
		485	5.5279	0.390836	5.8193	0.428793	1.10928	8.91941	0.647696	0.303473	0.036866	0.821608	4.14059	1.40568	2.81923	3.48847	3.39161	3.49078	5.5828	0.41779	0.199454	0.73467	3.72805	10.0105	6.52998	1.87225	0.337679	3.68865	0.717042	0.842244	6.39945	6.28066	2.72039	2.72039	6.26604	6.09009	0.611298	3.63421	5.85803	6.13457	13.461	8.0625	2.07979	0.024929	6.12212	12.0527	5.21598	0.103115	6.98438
		490	5.19957	0.444744	5.78029	0.147059	1.2866	9.1978	0.634146	0.1883	0.033794	0.600503	4.26077	1.21704	3.00089	3.48256	3.61305	3.69373	6.46452	0.46496	0.270492	0.758255	3.2685	9.92683	6.42398	1.66209	0.238592	3.24538	0.760986	0.977213	6.53398	6.48585	2.4	2.4	6.50535	5.81081	0.548904	3.8617	6.39938	5.95479	14.1424	8.10085	1.95289	0.055524	6.68664	12.8851	5.37979	0.149302	7.65755
		495	5.90129	0.539084	6.56879	0.264706	1.02474	8.3956	0.886179	0.297989	0.093702	0.942211	3.80499	1.33523	2.78362	3.61206	3.62238	3.83764	5.32043	0.318059	0.122951	0.701651	3.66437	9.70732	7.0803	1.42857	0.217731	3.99736	0.764202	0.879053	6.35922	6.71226	2.71456	2.71456	6.43717	5.72072	0.610877	4.18822	6.46178	6.01649	14.1686	7.82528	1.91565	0.133711	6.89977	11.7662	5.40951	0.138561	7.05078
		500	5.37554	0.552561	6.23409	0.159443	1.20825	9.35897	0.769648	0.184644	0.208909	0.635678	3.57823	1.4125	2.66429	3.36192	3.70863	3.51661	5.49677	0.238544	0.120219	0.691038	3.81756	9.85366	6.99786	1.55632	0.21382	3.49604	0.663451	0.834356	6.34258	6.92924	2.83883	2.83883	6.55749	5.53333	0.577572	3.82406	7.15913	5.96011	14.1517	8.34801	1.98404	0.129745	6.5553	12.5986	5.59313	0.148228	7.5651
		505	6.09013	0.54717	6.22177	0.233746	1.08454	8.1685	0.731707	0.023766	0.162826	0.713568	3.81406	1.69773	3	3.52395	3.80186	4.24539	5.24086	0.362534	0.314208	0.622642	3.99656	9.35889	7.58565	1.45467	0.357236	3.41161	0.75134	0.703769	7.19556	7.13208	2.75922	2.75922	6.78209	5.76577	0.559444	4.1653	6.68955	6.21755	13.5017	7.62642	1.91793	0.166006	7.25922	12.6919	5.393	0.199785	6.96354
		510	6.33691	0.781671	6.22382	0.30805	1.09072	9.7033	1.04878	0.3766	0.149002	0.751256	3.83447	1.675	2.72395	3.31579	3.8648	3.5369	5.07957	0.603774	0.234973	0.494104	4.0654	8.88153	7.22698	1.54533	0.341591	3.67019	0.575563	0.836985	6.72261	7.04245	2.6	2.6	6.84893	6.1982	0.572091	4.03928	6.59594	6.03191	14.3034	8.49006	2.0114	0.091218	7.1924	12.596	5.99934	0.119227	7.22526
		515	5.50215	0.77628	6.25462	0.464396	1.30516	8.69231	0.899729	0.213894	0.075269	0.515075	4.00227	1.90454	2.79074	3.63513	3.62937	3.97048	6.08602	0.328841	0.363388	0.694575	4.25473	9.31359	7.61777	1.38461	0.21382	3.29551	0.618435	0.919369	6.81276	7.1816	2.92815	2.92815	6.71658	6.12072	0.655565	4.11866	6.57566	6.03511	14.4102	8.61648	2.17857	0.145609	6.79032	13.273	6.02642	0.125671	7.29948
		520	5.40987	0.544474	6.68583	0.360681	1.21856	9.58242	0.639566	0.248629	0.099846	0.972362	4.03628	1.92614	2.83882	3.57895	3.85548	4.06827	5.89247	0.396226	0.325137	0.643868	3.9957	9.8676	7.92184	1.45055	0.400261	3.59367	0.600214	0.695881	6.74064	6.75472	2.82136	2.82136	6.94519	5.98919	0.548482	4.08511	7.16069	6.16968	14.8203	8.29829	2.16033	0.094051	7.04378	12.5905	6.06077	0.039742	6.91016
		525	5.42919	0.504043	6.84805	0.45356	1.46804	10.022	0.96748	0.23766	0.155146	0.889447	4.65533	2.00909	2.8504	3.73093	3.78555	3.77491	5.70108	0.207547	0.226776	0.713443	3.96902	10.324	7.73233	1.44368	0.202086	3.32454	0.620579	0.555653	7.18169	7.51179	2.93398	2.93398	6.7393	6.32432	0.607926	4.16203	7.03432	6.45	13.878	8.32671	2.2234	0.193768	7.69355	13.3203	6.08124	0.11493	7.90885
		530	5.49571	1.06739	6.54004	0.20743	1.37526	9.40659	0.918699	0.301645	0.238095	0.801508	4.0771	1.98523	2.8415	3.53873	3.50117	3.61808	6.10753	0.361186	0.349727	0.53066	3.84768	9.12544	7.26231	1.7239	0.383312	3.26121	0.653805	0.699387	7.30236	7.52123	2.84854	2.84854	6.65241	6.86667	0.661467	3.93944	7.52574	6.01968	14.7042	8.45171	2.019	0.13881	7.69009	13.4324	6.21929	0.137487	7.09766
		535	5.7897	0.654987	6.64682	0.258514	1.17938	8.82051	0.880759	0.226691	0.142857	0.595477	4.51927	2.06023	3.00267	3.53637	3.84382	3.60886	5.32043	0.091644	0.20765	0.418632	3.87435	9.41812	7.16488	1.70192	0.185137	3.29288	0.510182	0.845749	6.9043	7.06368	2.79418	2.79418	6.78075	6.03423	0.607083	4.33306	7.19033	5.93457	14.6127	8.23153	2.02432	0.133711	7.42166	13.6905	5.95905	0.050483	7.46875
		540	5.17811	0.649596	6.69815	0.455108	1.10722	10.1245	0.95122	0.02011	0.139785	0.713568	4.19501	2.07045	2.8415	3.74039	3.64569	3.64945	5.76344	0.700809	0.398907	0.774764	4.03356	10.0732	7.54711	1.64423	0.194263	3.0343	0.665595	0.911481	7.27184	7.16274	3.09903	3.09903	6.9893	6.50991	0.558179	4.38298	7.93448	6.33245	13.928	8.70171	2.07979	0.101416	7.30069	14.0338	6.09181	0.141783	7.40495
		545	5.3412	0.74124	7.34908	0.26935	1.22062	10.6557	0.945799	0.122486	0.087558	0.61809	4.40136	2.29886	3.05343	3.70786	4.18648	3.78413	6.37634	0.712938	0.382514	0.716981	4.03356	9.77352	7.63597	1.53571	0.277705	3.65963	0.600214	0.704645	7.00555	7.76651	3.16505	3.16505	7.09492	7.17478	0.591484	4.18249	7.42746	6.26436	15.1136	8.82954	2.01976	0.133711	7.42166	13.4541	6.52708	0.155747	7.69662
		550	5.06652	0.862534	6.73922	0.442724	1.0268	10.1319	0.831978	0.274223	0.075269	0.600503	4.04989	2.60682	2.67765	3.51508	3.78322	3.93358	6.05807	0.380054	0.224044	0.647406	3.98279	10.5819	7.5364	1.54121	0.336375	2.65963	0.647374	0.859772	7.47573	7.59906	3.26602	3.26602	7.65642	7.25766	0.592749	4.53028	7.55226	6.2266	15.0203	9.29829	2.18085	0.177337	7.4977	13.8649	6.3395	0.161117	7.48958
		555	5.67811	0.921833	6.70842	0.198142	1.00412	9.84615	0.682927	0.204753	0.044547	1.03518	4.93651	2.53977	2.88602	3.76818	3.17949	3.78967	6.36774	0.408356	0.327869	0.807783	3.87435	10.5784	7.09315	1.53159	0.205997	3.48021	0.629153	0.613497	7.53676	8.30424	3.19417	3.19417	7.27005	7.26667	0.563238	4.21195	8.0546	6.14202	14.8508	8.85227	2.10638	0.149575	7.12673	14.5243	6.62021	0.084855	7.21484
		560	5.30258	1.13207	6.88296	0.255418	1.32165	10.5604	0.579946	0.241316	0.136713	0.942211	3.99546	2.64204	2.61799	3.87936	3.9697	3.84871	4.86452	0.358491	0.275956	0.884434	3.74182	9.44251	7.53212	1.23626	0.196871	2.83905	0.836013	0.724803	6.43689	7.90566	2.73592	2.73592	7.10294	6.96937	0.607926	4.45008	8.02028	6.15053	14.2619	9.4446	2.26748	0.149008	7.26152	14.4378	6.59181	0.227712	7.58984
		565	5.11373	1.24798	6.45996	0.407121	1.17113	10.5971	0.642276	0.111517	0.105991	0.834171	4.18141	2.99546	2.88335	3.69545	3.51748	4.19004	6.56774	0.592992	0.240437	0.76533	4.18933	9.60627	8.09101	1.68132	0.249022	2.9657	0.789925	0.577564	7.46879	6.09434	3.09903	3.09903	7.30481	7.05045	0.480607	4.2545	7.44774	6.31543	13.9551	9.17614	2.37994	0.185269	6.94585	14.8122	6.29591	0.089151	7.62109
		570	4.36695	0.994609	7.48665	0.382353	1.26804	9.85348	0.731707	0.179159	0.073733	1.14322	4.39229	2.82727	2.88424	3.70195	4.21911	4.37269	6.28817	0.359838	0.338798	0.972877	4.4957	10.2788	7.78587	1.60714	0.273794	3.16359	0.698821	0.715162	7.14286	7.53774	2.60971	2.60971	7.61096	7.14955	0.685497	4.16285	7.66303	6.24681	14.1542	9.61506	2.31231	0.168839	7.4159	15.1865	6.89234	0.138561	7.66276
		575	5.36695	1.07817	7.43942	0.332817	1.11753	9.79853	0.864499	0.14808	0.082949	0.957286	4.89116	3.10796	2.63402	3.86753	4.42424	4.28413	5.86667	0.374663	0.060109	1.10849	4.24268	10.3868	7.97859	1.2967	0.32073	2.61478	0.811361	0.540754	7.20804	7.27358	2.80388	2.80388	7.70588	6.81261	0.536678	4.61538	7.72231	6.52128	14.5991	9.64915	2.40046	0.151841	7.40899	14.6919	6.70343	0.141783	7.64844
		580	4.46996	1.062	6.32444	0.427245	1.1134	9.37729	0.948509	0.177331	0.193548	0.834171	5.14286	3.13523	2.82547	3.90302	3.93473	3.66421	5.67312	0.415094	0.147541	1.05778	4.10585	9.96864	8.24518	1.65934	0.233377	3.26121	0.714898	0.680982	7.52566	7.125	2.62524	2.62524	7.44652	7.11171	0.486088	4.03601	8.29329	6.43564	14.4229	9.73722	2.50532	0.113881	7.7788	16.1959	6.30713	0.076262	7.74609
		585	5.29614	1.33154	7.53799	0.195046	1.3134	9.67766	0.823848	0.241316	0.179724	0.957286	4.92517	3.15455	2.98486	3.822	4.09557	3.79151	6.93548	0.490566	0.193989	1.16392	4.19277	10.9756	7.36831	1.5261	0.284224	2.70449	0.89925	0.673094	6.76006	7.51651	2.93204	2.93204	7.78743	7.30631	0.605396	4.23322	7.39782	6.42287	14.5839	9.17046	2.14666	0.126912	8.36175	15.4351	7.11163	0.118153	8.26172
		590	5.53648	1.13747	7.62012	0.380805	1.10309	9.79853	0.915989	0.173675	0.155146	0.796482	5.06122	3.00341	2.83081	3.76404	4.12354	4.28413	6.42366	0.365229	0.311475	1.34316	4.54991	10.0314	8.15632	1.56456	0.264668	2.49868	0.779207	0.516214	6.92094	8.76887	3.32427	3.32427	6.99064	7.53694	0.5	4.13584	8.18565	6.43032	14.6898	9.0071	2.04103	0.087252	7.54839	14.65	6.91744	0.186896	7.85547
		595	4.75322	1.63881	7.3347	0.24613	1.22268	9.12088	0.842818	0.137112	0.199693	0.776382	5.19274	3.13636	2.99733	3.85157	3.95105	4.37454	6.32043	0.610512	0.180328	1.07665	4.24785	10.6272	8.27623	1.49588	0.324641	2.26385	0.710611	0.588081	7.81415	7.41038	3.02718	3.02718	7.71123	7.83604	0.416526	4.3216	8.12949	6.78032	14.3466	9.64773	2.18693	0.185836	8.35023	16.0797	6.91546	0.099893	7.9987
		600	4.80901	1.4097	7.0575	0.331269	1.38763	10.4982	1.01626	0.28702	0.112135	1.00754	5.1746	3.41136	2.8228	3.93968	4.46853	3.97417	6.15484	0.332884	0.092896	0.880896	4.56885	9.80488	7.95075	1.30082	0.234681	2.93931	0.698821	0.645925	7.55895	7.62736	3.56893	3.56893	7.68182	7.78559	0.51855	4.4599	8.00312	6.37766	14.3602	9.33381	2.05547	0.105382	8.23848	15.5432	6.83223	0.143931	7.65365
		605	5.04506	1.72237	7.84189	0.275542	1.04949	10.674	0.948509	0.241316	0.112135	0.826633	4.71882	3.52386	2.84506	3.86044	3.78089	4.53505	6.14409	0.19407	0.379781	1.30778	4.3864	10.7596	8.24518	1.60577	0.27249	2.95778	0.629153	0.651183	8.04022	8.03774	3.07573	3.07573	7.95321	7.85045	0.56661	4.45581	8.16381	6.96649	14.7483	9.13352	2.13222	0.132011	7.85138	16.1987	6.89696	0.207304	8.35807
		610	4.39056	1.50943	7.91786	0.226006	1.03299	10.4945	0.734417	0.175503	0.115207	1.05025	4.89342	3.58864	2.91273	3.89651	4.12354	4.34686	6.10107	0.454178	0.363388	1.32901	4.22547	11.0906	8.05246	1.78984	0.20339	2.42744	0.703108	0.732691	7.55201	7.68868	3.36117	3.36117	8.0508	7.83063	0.501265	4.55155	8.078	6.55053	14.3949	8.91619	2.30699	0.107649	8.20737	16.0905	7.14201	0.182599	8.47786
		615	4.52146	1.28571	7.52361	0.270898	1.12371	10.7472	0.815718	0.126143	0.115207	1.12814	4.678	3.51591	3.16652	3.93791	4.47552	4.61255	6.26452	0.411051	0.368852	0.959906	4.40447	10.8467	7.46146	1.43544	0.352021	2.77836	0.712755	0.660824	7.77115	6.95283	2.8233	2.8233	7.56283	7.93153	0.517707	4.3216	8.63182	6.61702	15.0924	9.66477	2.05547	0.163173	8.63249	16.0838	7.42933	0.185822	7.90104
		620	4.80258	1.71159	7.94045	0.402477	1.33608	10.5128	0.823848	0.276051	0.248848	0.866834	5.60318	3.75682	2.89581	3.82732	4.08858	5.36531	5.88387	0.292453	0.401639	1.21934	4.57229	10.8153	8.43148	1.54533	0.255541	2.85752	0.747053	0.681858	7.08183	7.50708	2.94563	2.94563	7.7607	8.6036	0.434654	4.56301	9.07176	6.7266	14.9619	9.40057	2.31535	0.155807	7.87327	15.4865	7.22061	0.138561	7.79167
		625	4.77253	1.66307	7.9692	0.422601	1.21031	10.7802	0.842818	0.244973	0.155146	1.01759	5.83447	4.10909	2.8789	3.82318	4.28671	4.80443	6.60215	0.386792	0.453552	0.983491	4.64544	11.0279	7.91221	1.68681	0.374185	2.69921	0.613076	0.700263	7.44383	8.41509	3.47961	3.47961	7.69519	8.61802	0.543002	4.51227	8.77067	6.83564	14.8771	9.98722	2.37538	0.186402	8.29378	16.2946	7.21268	0.162191	8.3151
		630	4.30258	1.90566	7.83778	0.321981	1.06392	10.0513	0.95122	0.261426	0.095238	0.638191	5.46485	4.07955	3.12645	3.93022	4.40326	4.14391	6.82151	0.331536	0.20765	1.07547	4.40706	11.3415	8.47537	1.51786	0.318123	2.6438	0.830654	0.699387	8.02635	8.33962	3.00583	3.00583	8.32219	8.16216	0.505481	4.42717	8.15913	6.66968	14.8381	10.4943	2.58663	0.160907	8.30645	15.7108	7.55879	0.300752	8.40234
		635	4.13305	1.80593	7.38809	0.359133	1.24742	10.304	1.05962	0.111517	0.109063	1.07035	5.36281	3.82159	2.7667	3.77055	4.07226	4.31365	7.32258	0.37062	0.095628	1.23113	4.15921	11.0488	8.19807	1.88599	0.196871	2.08443	0.71597	0.612621	7.41748	9.41981	3.3301	3.3301	8.90508	7.9009	0.464165	4.81915	9.34321	6.65904	15.7483	10.0242	2.22568	0.183003	8.3871	16.5932	7.46697	0.148228	7.97656
		640	4.66738	2.10512	7.60986	0.620743	1.45979	11.1502	0.758808	0.177331	0.073733	0.896985	5.16553	4.18409	3.00089	3.87108	4.10956	5.0369	6.55699	0.342318	0.29235	1.34434	4.37521	10.3937	8.894	1.53297	0.432855	2.86544	0.728832	0.556529	7.50208	8.1533	3.81165	3.81165	8.06685	8.74054	0.505059	4.71195	9.04212	6.8984	15.722	10.4247	2.40882	0.134844	7.62788	15.6811	7.49141	0.225564	7.51693
		645	4.26395	2.00809	8.04518	0.339009	1.38144	10.6374	1.05149	0.283364	0.187404	0.894472	5.63039	4.15568	3.15138	4.09935	3.89744	4.86531	6.83441	0.416442	0.117486	1.05896	4.88726	11.4669	9.16702	1.60852	0.324641	3.12401	0.675241	0.594216	7.99861	7.76415	3.00388	3.00388	7.80749	8.48469	0.427487	4.64321	8.41966	7.03989	14.9178	10.0639	2.33283	0.056657	8.48848	16.2068	7.7107	0.306122	8.33203
		650	4.21888	1.78706	8.02464	0.413313	1.40825	10.8608	0.99458	0.160878	0	0.768844	5.47619	4.27614	3.12556	4.17386	4.40093	4.98709	6.29247	0.350404	0.387978	0.971698	4.97676	10.9303	8.91113	1.7555	0.402868	2.55937	0.595927	0.52936	7.64216	8.64151	3.39612	3.39612	8.68182	8.76216	0.526138	4.92635	8.58658	6.86915	15.1483	11.0085	2.68389	0.26119	8.44931	17.1311	7.9465	0.340494	8.15104
[truncated: 109 more columns]

## Sheet: Fig. 4C, E
Fig.4 C	Time(s)	Control	siRNA2	siRNA4	Fig.4 E	Control	siRNA 2	siRNA 4
	0	0.144436	0.129333	0.117152		137.84	4.43459	2.8348
	5	0.141495	0.128967	0.12058		97.9956	6.85283	3.12805
	10	0.156172	0.129456	0.119252		154.936	9.89278	3.94821
	15	0.152399	0.132324	0.115536		54.0108	9.25191	3.60761
	20	0.141939	0.130981	0.119862		31.886	10.846	3.5286
	25	0.14549	0.135315	0.115321		31.669	17.0985	16.4759
	30	0.140691	0.127502	0.115321			19.47	17.7051
	35	0.151372	0.142273	0.11568
	40	0.178345	0.140869	0.119324
	45	0.180565	0.154541	0.111874
	50	0.185059	0.144409	0.114728
	55	0.199818	0.136292	0.110545
	60	0.178595	0.14502	0.118354
	65	0.188055	0.139771	0.112592
	70	0.192966	0.149902	0.121514
	75	0.201428	0.156006	0.119808
	80	0.193049	0.157043	0.120437
	85	0.204784	0.15741	0.123812
	90	0.20259	0.159973	0.119503
	95	0.22717	0.155151	0.120275
	100	0.26882	0.167358	0.12216
	105	0.281804	0.162781	0.133182
	110	0.28394	0.163269	0.129718
	115	0.289627	0.169373	0.125732
	120	0.280416	0.172913	0.127061
	125	0.261634	0.165588	0.126845
	130	0.270484	0.160339	0.12356
	135	0.28935	0.158936	0.120921
	140	0.283024	0.166138	0.121945
	145	0.278835	0.167297	0.114692
	150	0.299171	0.161865	0.12444
	155	0.298644	0.166931	0.132967
	160	0.30766	0.163757	0.130974
	165	0.304747	0.170837	0.13049
	170	0.315595	0.174133	0.132769
	175	0.329799	0.154663	0.135893
	180	0.332019	0.172119	0.130615
	185	0.335625	0.172119	0.133811
	190	0.325194	0.178345	0.138442
	195	0.339704	0.181091	0.129484
	200	0.339926	0.181946	0.129807
	205	0.324584	0.186951	0.135983
	210	0.337151	0.190552	0.122806
	215	0.355573	0.196899	0.130238
	220	0.360012	0.182007	0.127958
	225	0.353242	0.186157	0.118893
	230	0.355739	0.188904	0.123506
	235	0.367447	0.189453	0.125266
	240	0.360178	0.186462	0.126792
	245	0.368196	0.188416	0.120329
	250	0.387478	0.184937	0.120742
	255	0.384925	0.188782	0.117475
	260	0.393664	0.190308	0.128371
	265	0.377712	0.194214	0.120544
	270	0.415381	0.195496	0.121711
	275	0.406328	0.194702	0.132787
	280	0.400149	0.202332	0.132751
	285	0.410219	0.199768	0.134977
	290	0.453882	0.200073	0.137724
	295	0.444669	0.201416	0.14074
	300	0.467524	0.206421	0.135624
	305	0.456685	0.208191	0.139017
	310	0.446657	0.214172	0.147561
	315	0.455917	0.217651	0.144294
	320	0.462857	0.220215	0.144582
	325	0.443857	0.232178	0.143576
	330	0.466349	0.225159	0.147777
	335	0.464819	0.227234	0.142822
	340	0.454723	0.215454	0.151421
	345	0.467785	0.230774	0.144115
	350	0.461964	0.221985	0.14223
	355	0.469536	0.21814	0.149769
	360	0.464541	0.221863	0.14889
	365	0.47529	0.207458	0.14792
	370	0.458742	0.22467	0.146825
	375	0.45204	0.22583	0.15345
	380	0.456584	0.229858	0.156232
	385	0.448977	0.222412	0.14661
	390	0.458211	0.244568	0.141386
	395	0.466835	0.23407	0.148262
	400	0.478014	0.239868	0.150757
	405	0.46653	0.236755	0.155317
	410	0.466044	0.237244	0.148692
	415	0.460042	0.230042	0.154814
	420	0.451848	0.233398	0.170055
	425	0.436905	0.224487	0.168565
	430	0.474303	0.225769	0.161241
	435	0.484215	0.222839	0.175063
	440	0.483198	0.226379	0.176589
	445	0.474924	0.221558	0.175315
	450	0.471556	0.221802	0.177558
	455	0.468312	0.22644	0.184667
	460	0.463045	0.218689	0.177774
	465	0.457914	0.218018	0.183123
	470	0.472392	0.222473	0.185403
	475	0.463056	0.222778	0.187414
	480	0.463712	0.208008	0.188832
	485	0.46899	0.217529	0.192315
	490	0.478666	0.219177	0.191148
	495	0.45901	0.214355	0.185637
	500	0.458569	0.221863	0.193122
	505	0.463158	0.214294	0.187432
	510	0.465125	0.21991	0.174938
	515	0.469047	0.23114	0.190753
	520	0.462367	0.234863	0.183141
	525	0.46786	0.233582	0.191632
	530	0.443269	0.246521	0.193948
	535	0.460415	0.224548	0.190717
	540	0.49941	0.227539	0.210105
	545	0.554398	0.233032	0.196677
	550	0.616416	0.23822	0.204073
	555	0.708421	0.235413	0.215113
	560	0.98366	0.244324	0.224322
	565	1.17076	0.244324	0.214521
	570	1.4276	0.252014	0.219619
	575	2.05576	0.250793	0.217465
	580	2.14499	0.249146	0.202888
	585	2.29295	0.248596	0.226333
	590	2.0311	0.248047	0.231664
	595	2.04809	0.257935	0.224915
	600	2.16817	0.24762	0.209674

## Sheet: Fig.4-S1
Panel C												Panel B
Time (s)	AnV											Time (s)	Calcium
0	0	0	0	0	0	0	0	0	0			0	1	1	1	1	1	1	1	1	1
5	-0.01786	0.005778	0.014931	-0.0028	0.015541	0.046498	0.002739	0.01286	0.007875			5	0.997454	0.985437	1.00024	0.99816	0.986831	1.02166	0.9825	0.998444	1.02587
10	-0.01756	-0.00498	0.005729	-0.0056	0.006395	0.022343	-0.0252	-0.02203	-0.00029			10	0.990636	0.977284	0.984718	0.99123	0.963068	0.996324	0.979431	0.972579	0.983829
15	-0.00551	0.023556	0.000347	-0.00752	-0.00059	0.006884	-0.008	0.014634	-0.0058			15	0.98184	0.974084	0.96753	0.993811	0.947025	1.01432	0.992785	0.952357	0.985572
20	0.017262	0.033689	0.02066	0.002063	0.002082	0.004831	-0.00055	-0.01197	0.020833			20	0.977158	0.959381	0.968643	0.985232	0.926385	1.01623	0.978659	0.925001	0.998517
25	0.020238	0.030844	0.021875	-0.02299	-0.02015	0.001087	0.013697	0.025868	-0.00816			25	0.996113	0.95128	0.955351	0.991039	0.91584	1.03256	0.983012	0.911596	0.968739
30	0.009077	0.018311	0.019618	0.022399	0.028852	0.026691	0.013259	0.00946	-0.01425			30	0.98109	0.95242	0.961086	0.989485	0.893974	1.00307	0.992883	0.877626	0.978218
35	-0.02158	0.004356	0.008681	0.000442	0.009518	0.012923	-0.00241	-0.00237	0.000573			35	0.990204	0.936586	0.944421	0.998423	0.886235	1.0107	0.983697	0.856989	0.977717
40	0.010417	0.016	0.020486	-0.00162	0.018441	-0.00109	-0.00066	-0.00562	-0.02048			40	0.976794	0.936446	0.979826	0.997562	0.858603	1.01716	0.98385	0.861493	0.976755
45	-0.00461	0.003822	0.011806	-0.01356	0.00119	0.006401	0.008766	-0.00739	-0.0043			45	0.977726	0.921445	0.959265	0.990919	0.850778	1.02253	0.98164	0.833542	0.990101
50	-0.00208	0.003467	0.035069	0.008694	0.001859	0.015338	-0.00329	0.005026	0.008519			50	0.975522	0.930791	0.942228	0.971419	0.841171	1.03428	0.978865	0.802644	1.00725
55	0.020833	0.034578	0.025174	-0.01415	-0.0232	-0.02766	0.018957	-0.0003	-0.00158			55	0.993272	0.89445	0.920283	0.97204	0.800513	1.03382	0.965762	0.783008	0.980262
60	-0.00179	0.017333	0.041667	-0.00059	0.012046	-0.00785	-0.00581	0.003843	-0.00895			60	0.983727	0.89168	0.917298	0.957057	0.787028	1.03074	0.978952	0.773789	0.986394
65	0.007589	0.0256	0.00816	-0.00987	-0.02186	-0.00857	0.018738	0.009313	0.005942			65	0.972317	0.895897	0.912288	0.961311	0.787555	1.02423	0.969495	0.771883	0.996954
70	-0.01964	0.0096	0.035937	-0.01503	-0.01673	-0.00386	0.021806	0.016851	0.008806			70	0.981522	0.911547	0.92057	0.960689	0.784499	1.0433	0.972967	0.765189	0.998517
75	0.002381	0.021422	0.013368	-0.00015	0.000818	0.003744	-0.00482	-0.00429	-0.00043			75	0.966044	0.89111	0.920722	0.932992	0.783819	1.03209	0.963923	0.763617	1.00343
80	-0.0064	-0.00418	0.007118	-0.00619	-0.02261	-0.00519	0.031558	0.029564	-0.00258			80	0.968544	0.885587	0.91163	0.953185	0.773983	1.03377	0.968799	0.761174	0.991524
85	0.022321	0.031467	0.027257	0.006484	0.016805	0.005797	0.01293	0.010495	0.019258			85	0.966158	0.87532	0.915915	0.93825	0.782909	1.03064	0.971824	0.756735	0.976895
90	-0.0061	0.019644	0.03125	-0.00118	-0.01576	-0.0029	0.019395	-0.00532	0.018471			90	0.955021	0.891066	0.913199	0.944989	0.776349	1.04804	0.958057	0.759814	0.990942
95	0.015923	0.031911	0.044097	0.004274	-0.01547	-0.00543	0.030024	0.013599	0.026489			95	0.954725	0.890961	0.91023	0.949266	0.762806	1.0434	0.963901	0.758991	0.993367
100	0.00625	0.023733	0.030903	0.007663	0.016954	0.030918	0.024655	0.031486	0.01797			100	0.966408	0.888506	0.919018	0.944391	0.76362	1.03988	0.977646	0.764578	0.99467
105	0.005952	0.020178	0.031771	0.004863	0.017921	0.015338	0.058952	0.058241	0.053408			105	0.969771	0.877161	0.900531	0.941834	0.760593	1.06438	0.981477	0.756133	0.99487
110	0.01369	0.031467	0.055556	0.038609	0.020672	0.014855	0.039229	0.030599	0.034006			110	0.954475	0.88535	0.908004	0.938011	0.756599	1.04434	0.972009	0.760783	0.993568
115	0.002083	0.038044	0.035069	0.014294	0.004833	0	0.035722	0.036955	0.018328			115	0.952907	0.864282	0.890023	0.937628	0.758591	1.03899	0.980574	0.757354	0.977176
120	0.011161	0.018222	0.000521	-0.01592	-0.01368	-0.01413	0.042845	0.026016	0.024699			120	0.942429	0.876881	0.902707	0.936362	0.755095	1.05385	0.962127	0.760164	0.988618
125	0.004464	0.034844	0.049826	-0.01017	-0.02446	-0.00193	0.063883	0.033259	0.033434			125	0.952543	0.875653	0.903736	0.929193	0.767029	1.05293	0.975143	0.749373	1.0001
130	0.020238	0.029689	0.052604	-0.02667	-0.01457	-0.01498	0.03375	0.017886	0.020189			130	0.942452	0.871629	0.904141	0.936123	0.745929	1.04147	0.986059	0.760742	0.993387
135	0.015179	0.031644	0.01684	-0.01916	-0.01286	-0.01691	0.050953	0.040355	0.039734			135	0.953543	0.873759	0.908982	0.940138	0.759176	1.03808	0.972303	0.758421	1.00014
140	0.01756	0.045689	0.039236	-0.02314	-0.01361	-0.02077	0.080649	0.061197	0.035367			140	0.950566	0.881133	0.897647	0.930005	0.753879	1.04177	0.968298	0.759349	0.977717
145	-0.0003	0.0304	0.023785	-0.00958	-0.01777	0.007005	0.047228	0.040798	0.030928			145	0.95643	0.873032	0.903922	0.940783	0.7534	1.0352	0.96068	0.747997	0.984991
150	0.014137	0.036533	0.043576	0.015915	0.0087	0.003986	0.052707	0.032373	0.026274			150	0.955225	0.8542	0.891878	0.924198	0.736831	1.04844	0.956338	0.750969	0.990401
155	0.015179	0.040178	0.041493	0.002063	-0.00521	-0.00085	0.045365	0.057058	0.029353			155	0.944566	0.867166	0.899317	0.93825	0.73774	1.04852	0.970856	0.748094	0.982706
160	0.009524	0.030933	0.034896	0.013705	-0.00692	0.027657	0.064431	0.044198	0.041452			160	0.961498	0.871234	0.906587	0.929527	0.747328	1.06068	0.973881	0.750676	0.995251
165	0.02128	0.0296	0.052083	0.010168	0.008031	-0.00785	0.063445	0.043902	0.043385			165	0.927997	0.866027	0.902539	0.929718	0.749339	1.0319	0.960049	0.741514	0.990642
170	0.024851	0.0152	0.035764	0.037283	0.019929	0.026449	0.079772	0.053511	0.045461			170	0.947475	0.871077	0.910922	0.932204	0.733794	1.03699	0.965327	0.74798	0.978919
175	0.001786	0.035378	0.046181	-0.00619	0.0029	0.005918	0.082731	0.048485	0.055269			175	0.952248	0.870296	0.922341	0.924843	0.738229	1.05974	0.986375	0.75518	0.985692
180	0.035417	0.049778	0.047396	-0.00442	-0.0055	0.000966	0.063993	0.069475	0.041953			180	0.944611	0.864992	0.910399	0.931989	0.731275	1.04415	0.97449	0.754561	0.980943
185	0.048214	0.053156	0.064236	-0.01533	-0.01153	-0.00447	0.060925	0.042129	0.046249			185	0.956612	0.871699	0.898339	0.929527	0.733095	1.04398	0.960919	0.747378	0.980141
190	0.031845	0.053778	0.041146	0.002358	0.012344	0.01413	0.084593	0.068293	0.045318			190	0.964748	0.861284	0.902252	0.9247	0.732061	1.05486	0.958678	0.752525	0.978619
195	0.022619	0.0448	0.052604	0.020189	0.036288	0.03285	0.090949	0.064745	0.057918			195	0.942725	0.865676	0.919423	0.919299	0.713623	1.05142	0.974229	0.750293	0.984269
200	0.029167	0.058044	0.079687	0.009136	0.012493	0.011715	0.082183	0.055728	0.049327			200	0.94602	0.861617	0.899216	0.916169	0.728076	1.04365	0.970899	0.75013	0.982947
205	0.07753	0.077511	0.064062	0.006926	0.018144	0.016304	0.070568	0.039468	0.050115			205	0.948611	0.840023	0.907666	0.91875	0.721008	1.05361	0.962824	0.756344	0.980342
210	0.050893	0.067111	0.069271	0.017978	0.020523	0.01401	0.073855	0.040503	0.055341			210	0.937043	0.856611	0.900902	0.916336	0.723517	1.05713	0.960941	0.7525	0.993167
215	0.049256	0.061422	0.061806	-0.00928	0.006767	0.00471	0.087881	0.042868	0.056415			215	0.946316	0.853463	0.898187	0.930292	0.715309	1.04469	0.961812	0.756279	1.00543
220	0.03497	0.044711	0.046181	-0.01208	-0.01056	-0.0087	0.075389	0.052476	0.05577			220	0.943111	0.856803	0.901594	0.907207	0.716794	1.05363	0.966557	0.749422	0.976354
225	0.01994	0.069956	0.065278	0.035514	0.036585	0.041425	0.113522	0.080857	0.072881			225	0.922746	0.864396	0.897866	0.9247	0.715108	1.06332	0.973783	0.750961	0.98992
230	0.035863	0.047556	0.059201	-0.00648	-0.00446	0.024034	0.067938	0.066814	0.063717			230	0.937224	0.853025	0.889011	0.918535	0.717981	1.05594	0.968527	0.749454	0.989119
235	0.054762	0.071556	0.059722	0.034335	0.009072	0.014251	0.088977	0.077753	0.058133			235	0.941702	0.86138	0.903466	0.918726	0.714524	1.05705	0.961235	0.749251	0.989319
240	0.057143	0.061244	0.068403	-0.00309	0.000446	0.0157	0.083059	0.045676	0.051833			240	0.946361	0.856348	0.89456	0.909884	0.707254	1.05009	0.974142	0.744413	0.981324
245	0.054911	0.065689	0.070486	0.026083	0.022531	0.007246	0.071773	0.040355	0.04947			245	0.945679	0.853042	0.889534	0.90575	0.713547	1.05924	0.957698	0.752639	0.981404
250	0.072768	0.0856	0.080035	0.000295	0.001933	0.017633	0.099058	0.079379	0.053336			250	0.955884	0.85697	0.913098	0.920757	0.699736	1.07249	0.963466	0.742507	0.96898
255	0.052381	0.057511	0.076042	0.000884	0.003941	0.008696	0.117576	0.081005	0.077892			255	0.944884	0.847712	0.901729	0.917722	0.700665	1.05808	0.970039	0.749544	0.96371
260	0.033929	0.065333	0.072396	-0.01547	-0.00937	-0.01039	0.083059	0.060902	0.056773			260	0.946157	0.84815	0.900447	0.928906	0.702245	1.05552	0.969822	0.740113	0.958219
265	0.045982	0.062756	0.063542	-0.00589	-0.01257	-0.00012	0.098729	0.056171	0.067869			265	0.94927	0.852323	0.8979	0.921522	0.707657	1.05737	0.970431	0.747972	0.972927
270	0.034524	0.062222	0.075347	-0.02417	-0.00915	-0.0122	0.089086	0.056171	0.053694			270	0.943997	0.849009	0.910753	0.90434	0.70326	1.05794	0.954205	0.746734	0.983067
275	0.074405	0.066489	0.084722	0.005452	0.010782	0.011594	0.084593	0.063415	0.054267			275	0.940475	0.840119	0.905221	0.910099	0.697399	1.04589	0.961235	0.754642	0.975112
280	0.064435	0.080978	0.074132	0.005158	-0.00097	0.015942	0.100263	0.056763	0.0688			280	0.955589	0.851201	0.915679	0.922979	0.699841	1.07116	0.944921	0.744698	0.975412
285	0.053423	0.085156	0.081597	0.010463	0.008551	0.00942	0.115604	0.070067	0.091924			285	0.928815	0.837024	0.901459	0.899465	0.694142	1.06627	0.961398	0.741139	0.973849
290	0.073958	0.0728	0.085069	0.020336	0.017326	0.025604	0.115494	0.068441	0.069874			290	0.947748	0.845502	0.923151	0.903384	0.700061	1.05293	0.953345	0.742255	0.978098
295	0.080952	0.076267	0.071528	0.01341	0.015021	0.018841	0.103769	0.059867	0.046463			295	0.956634	0.844626	0.90824	0.892702	0.697743	1.06242	0.970692	0.745456	0.976655
300	0.052679	0.079289	0.067882	-0.00339	-0.00402	0.003261	0.12437	0.065484	0.074599			300	0.950248	0.834166	0.925091	0.910911	0.705032	1.06674	0.955489	0.745521	0.962607
305	0.037798	0.066222	0.061806	0.029178	0.029001	0.034903	0.117905	0.062232	0.073382			305	0.959748	0.835876	0.918732	0.897027	0.694458	1.06278	0.969234	0.749723	0.982025
310	0.079464	0.077511	0.096528	0.014294	0.032049	0.026932	0.103002	0.076571	0.063144			310	0.941747	0.846528	0.92811	0.920757	0.698969	1.07435	0.954357	0.746954	0.970924
315	0.077381	0.086844	0.073264	0.035956	0.042832	0.029831	0.089634	0.076127	0.066438			315	0.946225	0.837428	0.917079	0.908593	0.691413	1.06251	0.954825	0.745586	0.951746
320	0.061458	0.087378	0.095486	0.018568	0.013311	0.022101	0.103989	0.064449	0.071377			320	0.942656	0.83997	0.920435	0.911963	0.690215	1.07022	0.966992	0.753404	0.978919
325	0.049702	0.088267	0.07691	-0.00295	0.01398	0.009662	0.117138	0.081744	0.07016			325	0.952907	0.842109	0.924838	0.915117	0.689679	1.08843	0.963303	0.752948	0.976194
330	0.045536	0.064889	0.102951	0.018273	0.020598	0.015097	0.138505	0.07864	0.095289			330	0.94627	0.830046	0.932512	0.899297	0.692955	1.07336	0.973859	0.74074	0.96892
335	0.072321	0.085067	0.099479	0.032862	0.032942	0.037923	0.142341	0.10037	0.071807			335	0.959157	0.851245	0.953934	0.926636	0.693702	1.0775	0.969114	0.745456	0.959702
340	0.072173	0.089689	0.110069	0.04244	0.045137	0.026087	0.135766	0.088987	0.108749			340	0.968794	0.835113	0.950207	0.914807	0.688568	1.07137	0.964707	0.752451	0.970503
345	0.082143	0.100622	0.090104	0.012968	0.032421	0.043357	0.161845	0.1085	0.107746			345	0.943838	0.835227	0.939985	0.918965	0.691077	1.07836	0.962378	0.749357	0.973108
350	0.076637	0.101422	0.086979	0.027409	0.049301	0.042754	0.152093	0.095787	0.107317			350	0.967589	0.847913	0.941149	0.90477	0.688233	1.07341	0.962182	0.744869	0.959321
355	0.064286	0.091556	0.100694	0.012378	0.017549	0.034058	0.110125	0.079379	0.095218			355	0.969226	0.842355	0.953175	0.917531	0.683358	1.07565	0.95267	0.746767	0.976094
360	0.070089	0.093956	0.100868	0.018862	0.027811	0.036473	0.168639	0.122395	0.107889			360	0.975113	0.837349	0.942178	0.908187	0.688041	1.07432	0.954716	0.738468	0.969501
365	0.064286	0.101689	0.091493	0.008694	0.023498	0.01087	0.156695	0.099039	0.097365			365	0.966453	0.830528	0.959534	0.913182	0.685043	1.08836	0.960397	0.747435	0.95862
370	0.092411	0.088711	0.102083	0.017094	0.023126	0.026691	0.169077	0.12269	0.138245			370	0.971794	0.837919	0.965067	0.913134	0.68216	1.0669	0.951484	0.738965	0.971946
375	0.07872	0.097422	0.101736	0.010021	0.043798	0.025362	0.175104	0.114412	0.107102			375	0.986977	0.836095	0.983605	0.910577	0.677075	1.06594	0.954498	0.745138	0.962748
380	0.076339	0.097333	0.073611	0.015326	0.038816	0.025121	0.158996	0.116482	0.090779			380	0.982431	0.844634	0.972286	0.904698	0.680628	1.07311	0.949405	0.739624	0.967497
385	0.069196	0.106578	0.117361	0.018273	0.032942	0.027415	0.162831	0.113525	0.081973			385	0.978454	0.843398	0.984853	0.905989	0.682668	1.06873	0.956914	0.738183	0.965633
390	0.057738	0.096089	0.106771	0.017978	0.017326	0.036594	0.161297	0.126681	0.111111			390	0.961066	0.831746	0.983132	0.910457	0.687476	1.08029	0.947087	0.746865	0.963409
395	0.075893	0.098133	0.100347	0.001032	0.019036	0.005314	0.173241	0.104804	0.108391			395	0.973226	0.842977	0.997537	0.915786	0.678913	1.0775	0.952703	0.738297	0.95888
400	0.104911	0.119822	0.127604	0.021515	0.047888	0.030556	0.169954	0.090613	0.106959			400	0.99375	0.836402	1.00071	0.915786	0.673876	1.09248	0.947697	0.734852	0.960002
405	0.086905	0.100356	0.10816	0.041409	0.033462	0.040942	0.169625	0.104804	0.107532			405	0.986727	0.838076	1.00046	0.914114	0.681624	1.08534	0.953878	0.746938	0.987055
410	0.07872	0.103822	0.107118	0.032125	0.03718	0.05157	0.156257	0.11116	0.099871			410	0.96268	0.841671	1.0016	0.930818	0.675523	1.08115	0.940372	0.74478	0.954612
415	0.0875	0.081689	0.095486	0.040377	0.043501	0.044928	0.178063	0.117221	0.099012			415	0.971931	0.835736	0.989356	0.935788	0.673579	1.05645	0.952648	0.740756	0.970102
420	0.075149	0.085067	0.071181	0.026525	0.04008	0.035507	0.173351	0.107021	0.10703			420	0.977772	0.84317	0.996694	0.935645	0.678732	1.08143	0.944181	0.733085	0.976474
425	0.053571	0.067467	0.088542	0.044651	0.053242	0.054348	0.175762	0.11323	0.117841			425	0.987749	0.839619	0.994231	0.922788	0.684737	1.08702	0.963303	0.736611	0.984049
430	0.077976	0.079911	0.100521	0.053492	0.050937	0.031039	0.181021	0.103474	0.119416			430	0.998773	0.835394	1.00256	0.919204	0.693702	1.08531	0.96006	0.743167	0.968759
435	0.078869	0.087378	0.09375	0.05084	0.062835	0.079831	0.18146	0.110273	0.117841			435	0.990704	0.846484	1.00594	0.918678	0.672621	1.08201	0.953845	0.736147	0.961405
440	0.066667	0.087556	0.097917	0.055998	0.079343	0.072222	0.188034	0.127273	0.120704			440	0.995454	0.84559	1.00617	0.939612	0.674575	1.07312	0.954411	0.743843	0.973649
445	0.09494	0.099378	0.121875	0.060861	0.063281	0.075483	0.158229	0.103769	0.103666			445	0.997568	0.848264	1.03114	0.910505	0.677822	1.07157	0.955445	0.731887	0.960624
450	0.094643	0.086133	0.100521	0.054966	0.065289	0.070169	0.207429	0.13895	0.137171			450	1.00739	0.835937	1.01547	0.921259	0.671481	1.08051	0.960713	0.732482	0.96908
455	0.093899	0.067378	0.097917	0.054819	0.05354	0.043237	0.16579	0.120621	0.117984			455	1.0058	0.84097	1.01742	0.921546	0.674029	1.07887	0.94047	0.735617	0.961966
460	0.106696	0.111111	0.101736	0.042882	0.045509	0.068116	0.189897	0.145307	0.128866			460	1.01716	0.843056	1.00823	0.934713	0.666539	1.08277	0.954096	0.726854	0.956636
465	0.104911	0.125511	0.136806	0.049219	0.064099	0.05	0.180145	0.125795	0.124284			465	1.01668	0.839067	1.01629	0.929336	0.668541	1.07162	0.951625	0.729794	0.957538
470	0.089286	0.103822	0.117708	0.029767	0.036065	0.045411	0.177076	0.135994	0.112758			470	1.01046	0.84154	1.02797	0.918487	0.661999	1.08567	0.945259	0.736065	0.952728
475	0.069643	0.101244	0.134549	0.055113	0.056514	0.056401	0.179925	0.123577	0.125			475	1.02491	0.83563	1.01796	0.919467	0.674422	1.08195	0.951059	0.740129	0.962948
480	0.108631	0.111467	0.134549	0.057029	0.058522	0.065459	0.197787	0.127864	0.118414			480	1.01636	0.832483	1.01833	0.923338	0.665907	1.07398	0.947882	0.735218	0.968799
485	0.112054	0.110844	0.103819	0.037135	0.05116	0.058333	0.185952	0.118108	0.12321			485	1.03262	0.833605	1.01019	0.931989	0.668062	1.07091	0.950102	0.725902	0.952047
490	0.106101	0.1112	0.120833	0.036104	0.053391	0.054106	0.203375	0.126977	0.134808			490	1.03512	0.845064	1.01624	0.92893	0.66289	1.08604	0.965196	0.731008	0.968579
495	0.079315	0.113511	0.129861	0.034777	0.048557	0.063043	0.194938	0.121212	0.122136			495	1.04432	0.841899	1.02905	0.922239	0.666587	1.08834	0.956762	0.739942	0.954171
500	0.105655	0.120533	0.14184	0.01621	0.036957	0.043599	0.203265	0.130968	0.141251			500	1.05287	0.834131	1.04878	0.926134	0.659576	1.07374	0.940938	0.732474	0.948861
505	0.090774	0.114578	0.10191	0.027557	0.051755	0.052536	0.231975	0.157428	0.139032			505	1.05343	0.830782	1.03976	0.93868	0.661377	1.0828	0.957665	0.734477	0.951145
510	0.120238	0.120533	0.123785	0.024904	0.05116	0.042754	0.209402	0.128899	0.129868			510	1.06137	0.847168	1.06099	0.943579	0.660093	1.08221	0.959374	0.723279	0.955333
515	0.091369	0.1336	0.139063	0.051577	0.057332	0.068599	0.212251	0.130525	0.143184			515	1.07282	0.8399	1.06447	0.941858	0.663484	1.08622	0.948654	0.73047	0.952768
520	0.121726	0.129867	0.128819	0.044651	0.054506	0.071618	0.208196	0.129342	0.138459			520	1.05818	0.854024	1.05323	0.943101	0.662995	1.08073	0.939415	0.731611	0.95353
525	0.094643	0.125511	0.163368	0.040377	0.071981	0.0593	0.190664	0.139394	0.130942			525	1.0945	0.840216	1.07872	0.927616	0.660725	1.07984	0.95292	0.727009	0.965974
530	0.120833	0.131822	0.144618	0.075597	0.067594	0.073309	0.194061	0.137324	0.155498			530	1.07732	0.844696	1.08576	0.942002	0.661185	1.08014	0.942767	0.735072	0.96399
535	0.089435	0.115911	0.139583	0.022841	0.039114	0.032488	0.203156	0.142646	0.141323			535	1.06432	0.836411	1.08857	0.928595	0.659317	1.09254	0.951963	0.736798	0.952889
540	0.102232	0.134489	0.128125	0.052903	0.066106	0.059541	0.203156	0.106135	0.131085			540	1.05916	0.842679	1.10605	0.938632	0.660869	1.08152	0.943126	0.735536	0.969421
545	0.122173	0.139556	0.117708	0.049808	0.061942	0.054469	0.234714	0.121656	0.124356			545	1.08841	0.841917	1.12388	0.946208	0.660974	1.09171	0.941809	0.73578	0.956275
550	0.114881	0.130133	0.151215	0.068229	0.080979	0.09058	0.20984	0.149741	0.152277			550	1.10112	0.84509	1.13978	0.954882	0.665236	1.08011	0.941156	0.731692	0.957858
555	0.12128	0.139289	0.148438	0.042735	0.073989	0.075	0.251698	0.146194	0.162514			555	1.10269	0.837393	1.11976	0.950963	0.661348	1.09311	0.944824	0.736139	0.956636
560	0.136012	0.129867	0.144271	0.064397	0.060158	0.047464	0.238659	0.157576	0.161512			560	1.12394	0.855103	1.1555	0.950652	0.65471	1.08665	0.962454	0.728508	0.952368
565	0.118601	0.131911	0.139063	0.059534	0.073691	0.065217	0.244576	0.166297	0.165879			565	1.12237	0.835525	1.13948	0.95689	0.659873	1.08555	0.935083	0.734624	0.970924
570	0.123363	0.1328	0.132986	0.059976	0.066478	0.060507	0.255862	0.14782	0.141538			570	1.14153	0.839988	1.13567	0.948884	0.65654	1.07956	0.940177	0.728369	0.949342
575	0.140923	0.1496	0.14566	0.049514	0.05644	0.060628	0.238111	0.163489	0.166237			575	1.15949	0.842995	1.15441	0.957941	0.653705	1.09205	0.946652	0.730715	0.952568
580	0.129464	0.137333	0.149132	0.037135	0.051681	0.036473	0.232303	0.14782	0.130942			580	1.13337	0.846774	1.13786	0.95297	0.658551	1.0838	0.945313	0.726757	0.951225
585	0.11875	0.138667	0.144097	0.031683	0.040898	0.056884	0.260903	0.183149	0.171249			585	1.1598	0.853752	1.16628	0.968026	0.659068	1.0796	0.94158	0.730006	0.936276
590	0.111161	0.138667	0.140799	0.029472	0.048037	0.055556	0.260355	0.164671	0.160152			590	1.13932	0.848255	1.17338	0.969388	0.660371	1.07346	0.93701	0.730096	0.954412
595	0.141964	0.16	0.151736	0.051429	0.066255	0.041546	0.245124	0.163193	0.147337			595	1.17026	0.859267	1.18745	0.957081	0.653676	1.07464	0.940449	0.728793	0.943931
600	0.115327	0.1512	0.187153	0.084291	0.069453	0.0843	0.248411	0.167184	0.154138			600	1.1713	0.847589	1.19104	0.976557	0.662286	1.0965	0.938555	0.736489	0.939723
605	0.145387	0.163644	0.165104	0.036546	0.063206	0.061715	0.267149	0.143681	0.153852			605	1.18055	0.843915	1.19103	0.999283	0.666242	1.08529	0.936019	0.733459	0.949262
610	0.136458	0.156178	0.142014	0.043324	0.055845	0.058696	0.248521	0.161123	0.166881			610	1.20937	0.849649	1.19094	0.977895	0.654864	1.0924	0.950591	0.737149	0.947478
615	0.123363	0.147289	0.145139	0.022104	0.044319	0.05628	0.265396	0.171914	0.167955			615	1.20024	0.858127	1.1987	0.986498	0.663838	1.07444	0.937129	0.724802	0.963229
620	0.122619	0.160622	0.141319	0.047009	0.071237	0.045531	0.234714	0.147081	0.152491			620	1.20715	0.848843	1.21135	0.987382	0.657057	1.07572	0.942125	0.732498	0.949542
625	0.15119	0.176889	0.17934	0.01061	0.041419	0.033454	0.266272	0.181523	0.173468			625	1.23031	0.854463	1.21182	0.97627	0.647671	1.08656	0.929794	0.727832	0.93279
630	0.144196	0.167911	0.166667	0.057177	0.071684	0.083816	0.233837	0.166149	0.162658			630	1.18385	0.846826	1.21081	1.00081	0.648609	1.08207	0.936618	0.739836	0.946256
635	0.149405	0.158667	0.159375	0.062187	0.080904	0.083454	0.247535	0.151515	0.154926			635	1.19176	0.8574	1.21845	0.996631	0.651157	1.09028	0.939709	0.734396	0.941286
640	0.133185	0.1528	0.18125	0.048187	0.05815	0.073188	0.27197	0.176201	0.157503			640	1.19933	0.853489	1.23191	0.981241	0.654912	1.07853	0.943866	0.723947	0.949582
645	0.140625	0.167733	0.184549	0.031536	0.061199	0.044444	0.282161	0.180783	0.188216			645	1.18146	0.860749	1.22675	1.00318	0.66244	1.09563	0.952496	0.73596	0.942388

## Sheet: Fig.4-S2B
Time (sec)	Scrambled siRNA																										TRPV4 siRNA2
0	0	0	0	0	0	0	0	0	0	0	0	0	0.040179	0	0.002926	0.024444	0	0	0	0	0	0	0	0	0		0	0	0.01036	0	0	0	0	0	0	0	0.248322	0.094763	0	0	0	0.108033	0	0.084083	0	0.022965	0	0.042636	0
5	0.162231	0.02323	0.075897	0.272331	0.103799	0.124519	0.124947	0.064546	0.126674	0.015204	0.146624	0.128234	0.059028	0.024474	0.014336	0	0.019553	0.017143	0.073034	0.073034	0.056075	0.062814	0.038005	0.271739	0.210317		0.096241	0.013041	0	0.181935	0.104946	0.062835	0.078209	0.153377	0.028528	0.101014	0	0.235037	0.043788	0.046706	0.115972	0	0.020572	0.039404	0.002074	0	0.079041	0.104651	0.111732
10	0.089987	0.169248	0.277731	0.766158	0.248304	0.224647	0.133932	0.200187	0.114955	0.116233	0.154341	0.185039	0	0.158866	0.014043	0.095556	0.057263	0.045714	0.026217	0.026217	0.008178	0.278894	0.103325	0.327446	0.40873		0.115038	0.137087	0.110299	0.274839	0.008444	0.189272	0.132147	0.154901	0.040847	0.0714	0.248322	0	0.049898	0.030859	0.258393	0.387812	0.123435	0.049953	0.034215	0.035491	0.102131	0.151163	0.115084
15	0.269962	0.013274	0.225188	0.535948	0.221845	0.299101	0.171588	0.398971	0.339286	0.147131	0.318971	0.223285	0.131448	0.087162	0	0.203333	0.28352	0.068571	0.157303	0.157303	0.136682	0.285176	0.122328	0.251359	0.793651		0.132331	0.110369	0.122486	0.221935	0.202654	0.264368	0.11165	0.185373	0.012535	0.068154	0.286673	0.223815	0.002546	0.286906	0.219736	0.289012	0.0161	0.035371	0.043027	0.052192	0.142984	0.324289	0.236872
20	0.086185	0.114676	0.278565	0.738562	0.333786	0.467908	0.049208	0.361085	0.393415	0.16822	0.319614	0.289651	0.095238	0.001288	0.025161	0.306667	0.185754	0.16	0.179775	0.179775	0.081776	0.491206	0.486936	0.533967	0.702381		0.261654	0.217875	0.270567	0.224516	0.226779	0.296552	0.21575	0.226511	0.086665	0.202434	0.296261	0.250623	0.139002	0.323603	0.36826	0.31856	0.102862	0	0.041472	0.050104	0.143872	0.417313	0.559777
25	0.166033	0.190265	0.35196	0.55846	0.474898	0.398588	0.146769	0.512161	0.457589	0.207455	0.497749	0.326209	0.114583	0.330614	0.021358	0.324444	0.337989	0.214286	0.166667	0.166667	0.054907	0.486181	0.357482	0.52038	0.771825		0.453383	0.231234	0.237051	0.415484	0.161641	0.565517	0.325782	0.27933	0.101794	0.341582	0.394056	0.302369	0.181772	0.281902	0.477111	0.409972	0.17263	0.063916	0.101089	0.122129	0.269982	0	0.406704
30	0.403042	0.248156	0.278565	1.02179	0.549525	0.501284	0.217373	0.511225	0.4375	0.40412	0.578135	0.436445	0.21131	0.260627	0.085723	0.354444	0.357542	0.292857	0.365169	0.365169	0.199766	0.419598	0.533254	0.5625	1.28373		0.493985	0.334288	0.449726	0.394839	0.281062	0.684291	0.31877	0.239208	0.150638	0.333063	0.475551	0.355985	0.284623	0.421184	0.534079	0.454294	0.183363	0.060503	0.053914	0.332985	0.259325	0.20801	0.501676
35	0.39417	0.314159	0.641368	0.550472	0.527137	0.376765	0.43988	0.661833	0.59933	0.414909	0.628296	0.420697	0.248016	0.40103	0.162961	0.478889	0.353352	0.39	0.316479	0.316479	0.186916	0.501256	0.485748	0.498641	1.11309		0.509023	0.343193	0.502133	0.48129	0.306393	0.55249	0.43959	0.351955	0.088826	0.422718	0.657718	0.298005	0.287678	0.383653	0.448627	0.399815	0.211091	0.095563	0.108865	0.354906	0.44849	0.541344	0.547486
40	0.269962	0.314528	0.620517	0.832244	0.407734	0.47561	0.526316	0.685688	0.727121	0.331045	0.724759	0.514061	0.291667	0.432804	0.098011	0.481111	0.26676	0.408571	0.327715	0.327715	0.251168	0.609296	0.52019	0.538043	1.47024		0.502256	0.492684	0.555759	0.636129	0.264174	0.672031	0.521575	0.344337	0.211584	0.474239	0.4535	0.353491	0.442974	0.667223	0.675483	0.730379	0.404293	0.081601	0.20788	0.461378	0.418295	0.286822	0.617877
45	0.666667	0.355826	0.705588	0.702251	0.725916	0.557125	0.465126	0.920486	0.723214	0.391859	0.840514	0.691789	0.248016	0.447832	0.150673	0.486667	0.364525	0.478571	0.438202	0.438202	0.308411	0.669598	0.743468	0.66712	1.41865		0.744361	0.48855	0.731261	0.811613	0.435464	0.810728	0.566343	0.437024	0.202291	0.604462	0.813039	0.52182	0.464358	0.791493	0.649034	0.503232	0.270125	0.090599	0.257128	0.345511	0.538188	0.671835	0.996648
50	0.708492	0.490044	0.797331	0.945534	0.644505	0.589859	0.637997	1.04818	0.667969	0.436979	0.926045	0.781777	0.418155	0.563761	0.205091	0.632222	0.416201	0.587143	0.468165	0.468165	0.278037	0.836683	0.906176	0.726902	1.49802		0.651128	0.500636	0.768434	0.890323	0.480097	0.872031	0.609493	0.592179	0.248973	0.573225	1.01438	0.571696	0.5	0.769808	0.656155	0.65928	0.134168	0.093391	0.175739	0.436326	0.687389	0.546512	0.993296
55	0.747782	0.486357	0.960801	0.986202	0.739484	0.641849	0.685066	1.07577	1.02065	0.586072	0.875241	0.735096	0.55754	0.528553	0.214745	0.69	0.52933	0.63	0.558052	0.558052	0.476636	0.880653	0.994062	0.913043	1.67262		0.73985	0.670483	0.824497	0.936774	0.460796	0.824521	0.737864	0.601067	0.306678	0.652333	1.06328	0.604738	0.505092	0.81151	0.863683	0.582641	0.5322	0.170338	0.224987	0.528184	0.513321	0.693798	1.02123
60	0.532319	0.495944	0.914929	0.981845	0.799186	0.640565	0.451861	1.15528	0.862165	0.566945	1.03987	0.754218	0.518849	0.532847	0.331188	0.772222	0.463687	0.692857	0.629213	0.629213	0.303738	1.00251	0.909739	0.665761	1.80159		1.07068	0.639313	0.794637	0.96129	0.486128	1.08659	0.721143	0.64322	0.324184	0.735903	0.630872	0.55798	0.619145	0.743953	0.843337	0.821791	0.27102	0.165684	0.214619	0.579332	0.651865	0.793282	0.858101
65	0.752852	0.549779	0.969141	0.973856	1.06716	0.862003	0.685922	1.30262	0.878906	0.60667	1.11961	0.751406	0.544147	0.623444	0.296957	0.741111	0.643855	0.718571	0.537453	0.537453	0.425234	0.888191	0.932304	0.89538	1.89881		0.956391	0.775445	0.856185	1.09807	0.615199	1.00077	0.795577	0.662773	0.349038	0.724949	0.973154	0.859726	0.723014	0.904921	0.805697	0.78024	0.658318	0.13776	0.258683	0.665971	0.701599	0.869509	1.46369
70	0.851711	0.639012	1.15179	1.11983	0.934871	0.839538	0.738982	1.42002	1.02455	0.677783	1.35305	0.928009	0.706845	0.67325	0.380047	0.931111	0.694134	0.71	0.756554	0.756554	0.509346	1.17839	1.04394	1.14402	2.66071		0.924812	0.748092	0.895186	1.09032	0.564536	1.02222	0.887271	0.614779	0.374108	0.789452	1.04219	0.724439	0.6222	0.89241	0.85351	0.734072	0.605546	0.139001	0.242613	0.653445	0.811723	0.841085	1.35307
75	0.712294	0.781342	0.989992	0.992012	0.975577	0.835045	0.674369	1.55005	1.37891	0.709662	1.13119	1.01519	0.584821	0.689137	0.413985	0.914444	0.642458	0.835714	0.825843	0.825843	0.393692	1.22613	1.2019	1.0625	2.24008		1.17068	0.858779	1.00366	1.31097	0.377563	1.19387	0.855448	0.644997	0.43592	0.841785	1.31544	0.853491	0.800916	1.03419	1.0061	1.02493	0.545617	0.193608	0.264386	0.674322	0.798401	0.943152	1.52626
80	1.1597	0.66851	1.18599	1.24837	1.06445	0.758023	0.758237	1.78812	1.42578	0.85385	1.26688	1.03825	0.769345	0.634607	0.380925	1.15889	0.800279	0.671429	0.958801	0.958801	0.439252	1.46859	1.47862	1.09103	2.5		1.12707	0.814567	0.932358	1.21806	0.72497	1.28506	0.729234	0.700609	0.390102	0.852738	1.11985	0.897132	0.868635	0.839867	0.862665	0.837488	0.555456	0.226807	0.212545	0.688935	0.754885	0.861757	1.54637
85	1.06844	0.639749	1.26355	1.29339	1.15875	0.792041	0.741977	1.93966	1.65513	0.755763	1.13826	1.19966	0.634425	0.61872	0.342598	1.03111	0.456704	0.78	0.67603	0.67603	0.568925	1.44724	1.30879	1.30163	2.47817		1.22406	0.972646	0.915296	1.24903	0.655006	1.22375	0.970874	0.729304	0.449968	0.926978	1.2349	0.894015	0.700102	1.17098	0.994914	1.25023	0.589445	0.157927	0.235874	0.794363	1.03197	1.01034	1.83575
90	1	0.738201	1.3995	1.49818	1.31547	1.04557	0.833547	1.88821	1.524	0.88769	1.38071	1.17829	0.805556	0.521254	0.38385	1.08222	0.655028	0.97	0.743446	0.743446	0.608645	1.56281	1.24109	0.974185	2.2877		1.35639	0.999046	1.1426	1.39226	0.571773	1.28965	1.07012	0.844083	0.528204	0.94929	0.921381	1.09788	0.783096	1.41451	0.899288	1.09326	0.549195	0.168166	0.397615	0.941545	0.986679	0.864341	1.7229
95	1.31686	0.668879	1.26772	1.5207	1.26527	0.972401	0.764228	1.9102	1.51005	1.01471	1.42572	1.15242	0.889881	0.766423	0.4488	1.21889	0.611732	1.07714	0.94382	0.94382	0.599299	1.7098	1.5772	1.25272	2.79762		1.40075	1.12564	1.12188	1.46581	0.652593	1.5272	1.09978	0.808278	0.527123	1.02231	1.16107	1.05175	0.947556	1.14179	0.968464	1.00092	0.745975	0.294756	0.416796	0.998956	1.03464	1.07235	1.90279
100	1.27123	0.867625	1.47373	1.66812	1.40638	1.24069	0.970475	2.07016	1.40011	0.947033	1.51061	1.37177	0.985119	0.624732	0.526624	1.26556	0.805866	1.04286	0.777154	0.777154	0.61215	2.02638	1.77672	1.34375	2.77183		1.56917	1.13422	1.22547	1.57677	0.537998	1.51724	1.12298	0.995683	0.531662	0.992698	1.33941	1.05985	1.13951	1.46956	1.20956	1.14958	0.808587	0.207571	0.390876	1.01148	1.06838	1.19509	1.71508
105	1.3346	0.773968	1.61218	1.8533	1.44098	1.18357	1.03295	2.02385	1.50167	1.11476	1.67781	1.34083	0.900794	0.690854	0.552955	1.47556	0.965084	1.13286	1.10861	1.10861	0.586449	1.90201	1.54276	1.48777	2.87103		1.68271	1.25	1.24863	1.76258	0.895054	1.51418	1.26429	0.944642	0.549168	1.08195	1.39597	1.11534	1.05906	1.37198	1.19329	1.26408	0.84347	0.219361	0.40902	1.16388	1.12078	1.18734	1.96983
110	1.33967	0.980088	1.5563	2.00436	1.48575	1.29268	1.14078	2.12535	1.51953	1.23345	1.94791	1.46907	0.977679	0.822671	0.51024	1.39778	0.99581	1.06286	1.08989	1.08989	0.643692	1.69472	1.56888	1.49049	2.72024		1.58872	1.25191	1.23096	1.57548	0.788902	1.35402	1.2945	0.941595	0.614869	1.16187	1.48322	1.25748	1.11558	1.32944	1.27467	1.31671	0.859571	0.215017	0.424572	1.01461	1.16963	1.09948	1.81899
115	1.53232	0.98267	1.6839	1.96587	1.44301	1.30231	1.1887	1.99345	1.62946	1.23492	1.84952	1.49887	0.967758	0.7617	0.629315	1.39222	1.01117	1.11286	1.07491	1.07491	0.703271	1.86432	1.91449	1.45652	3.14881		1.75714	1.34574	1.34004	2.06194	0.739445	1.49578	1.34898	1.07263	0.629998	1.24787	1.41419	1.40648	1.14308	1.65972	1.3764	1.34164	0.645796	0.201675	0.34422	1.02088	1.12522	1.12274	1.86816
120	1.70089	0.974558	1.55463	1.61511	1.71099	1.18678	1.07403	2.28157	1.63281	1.41393	1.94791	1.67717	1.09077	0.973809	0.716208	1.53222	0.706704	1.16571	1.05431	1.05431	0.641355	1.77136	1.67815	1.53125	3.05357		1.74662	1.24905	1.54052	1.90323	0.841978	1.59693	1.27184	1.02311	0.656797	1.23773	1.77469	1.40711	1.32841	1.78899	1.31028	1.39058	0.974061	0.223084	0.485226	1.28497	1.18117	1.0801	1.99218
125	1.49683	1.07928	1.70142	2.00073	1.6791	1.31579	1.16688	2.46539	1.85491	1.32467	1.98649	1.65917	1.04018	0.908974	0.700702	1.65111	0.951117	1.21571	1.33333	1.33333	0.661215	1.73493	1.79454	1.44022	3.58135		1.59098	1.45134	1.48141	2.00774	0.965018	1.69732	1.32794	1.09116	0.649881	1.27748	2.0326	1.5293	1.26426	1.89825	1.34079	1.24284	0.898927	0.32144	0.489891	1.31002	1.56039	1.26486	2.37095
130	1.67047	1.04056	1.83069	2.00508	1.82564	1.41142	1.09927	2.47194	1.9548	1.28985	1.93698	1.76378	1.12153	0.92529	0.74371	1.53667	0.990223	1.14714	1.2191	1.2191	0.76285	2.05653	2.03325	1.57745	3.35119		1.87594	1.40394	1.43937	2.42581	0.969843	1.69349	1.42449	1.16176	0.735682	1.34848	1.55992	1.39402	1.16141	1.70809	1.46592	1.32687	1.12791	0.262799	0.452566	1.38935	1.32771	1.48062	2.24693
135	1.90494	1.01106	1.71309	1.70298	1.98372	1.34852	1.29311	2.71515	1.99275	1.46199	2.2283	1.72778	1.1255	0.9459	0.705383	1.46778	1.10196	1.27429	1.23783	1.23783	0.785047	2.00126	2.01663	1.57609	3.41071		2.10451	1.53562	1.6429	2.16387	0.917973	1.72567	1.32309	1.10132	0.751243	1.39554	1.83797	1.55985	1.48982	1.83486	1.41607	1.48384	1.08766	0.28793	0.44168	1.25887	1.51687	1.45349	2.39777
140	2.08872	1.13237	1.82152	1.96151	1.97761	1.37099	1.27043	2.6174	2.08873	1.40216	1.9254	1.73791	1.12351	1.06999	0.67876	1.96111	1.1662	1.34429	1.02622	1.02622	0.669393	2.25628	2.1829	1.84511	3.72817		2.01128	1.52576	1.59781	2.20774	1.14958	1.66437	1.40669	1.27781	0.784742	1.5428	2.02972	1.77556	1.38238	1.87573	1.69685	1.44691	1.13596	0.253801	0.572317	1.31524	1.59858	1.39793	2.47933
145	2.03295	1.11357	1.85988	2.09804	1.97897	1.38254	1.30424	2.80683	2.05971	1.6768	2.00643	1.94488	1.09375	1.09188	0.807782	1.72556	0.945531	1.19286	1.14045	1.14045	0.744159	2.46608	2.31116	1.75408	3.94048		2.13759	1.64663	1.73431	2.57032	1.02051	1.81226	1.47411	1.24302	0.809596	1.52454	2.41898	1.55798	1.44297	2.04003	1.56561	1.72576	1.15474	0.242321	0.512701	1.64614	1.46536	1.90569	2.44358
150	1.77313	1.05347	1.89074	2.18736	1.94437	1.59178	1.24305	2.84659	2.04799	1.67925	2.17299	2.08661	1.13046	0.965221	0.836747	1.79111	1.01676	1.27714	0.953184	0.953184	0.775701	2.38945	2.46318	2.01223	3.51984		2.20075	1.57634	1.55149	2.40774	0.958987	1.70115	1.56203	1.25724	0.765291	1.45193	2.4535	1.63217	1.50866	2.01168	1.69481	1.73777	1.23256	0.37884	0.610161	1.65345	1.69538	1.68863	2.75419
155	2.06084	1.28577	1.88824	2.28758	2.20963	1.64827	1.28455	3.10664	2.06473	1.70476	2.28232	2.12655	1.3125	1.22198	0.819193	2.13333	1.18296	1.34571	1.26405	1.26405	0.859813	2.51131	2.32779	2.09783	4.28373		2.15113	1.63486	1.84826	2.38193	1.39445	1.72874	1.43959	1.28669	0.93927	1.57891	2.53595	2	1.50611	2.18265	1.44151	1.63712	1.18694	0.331058	0.635044	1.47808	1.65631	1.7261	2.94749
160	1.9962	1.14491	1.98499	2.29993	2.21099	1.89666	1.21181	3.0435	2.24107	1.71947	2.3344	2.22385	1.32044	1.0249	0.825922	2.06111	1.06425	1.51	1.3764	1.3764	0.988318	2.87186	2.53563	1.99728	4.5377		2.17895	1.79516	1.78184	2.44516	1.10736	1.86667	1.60518	1.28695	0.935379	1.6714	2.41227	1.83229	1.46945	2.14262	1.88708	1.68236	1.31843	0.393733	0.535511	1.22338	1.74334	1.8217	2.63687
165	2.29785	1.19506	2.04337	2.43718	2.23338	1.53017	1.46256	3.02572	2.29464	1.91123	2.64695	2.19235	1.21429	1.31086	0.828847	1.81	1.19693	1.46571	1.29588	1.29588	0.891355	2.3995	2.59857	2.08967	4.33929		2.39173	1.82888	2.05667	2.36387	0.955368	1.88966	1.69256	1.38116	0.993949	1.5501	2.21381	1.87531	1.55295	2.09174	1.64191	1.8855	1.32021	0.284207	0.594609	1.62004	1.97602	1.94703	2.72626
170	2.25222	1.25406	2.03837	2.4931	2.08277	1.52503	1.68977	3.21936	2.41741	1.91417	2.47267	2.1631	1.25496	1.26063	0.844061	1.86222	1.13408	1.38143	1.20974	1.20974	0.773364	2.90704	2.64964	2.02174	4.69643		2.38947	1.8187	2.00609	2.65807	1.18456	2.00843	1.63161	1.38294	1.08818	1.64868	2.49473	2.07294	1.67872	2.39867	1.64293	1.92521	1.32379	0.317406	0.548989	1.51879	1.93428	2.00904	2.90726
175	2.23321	1.15745	2.04837	2.46042	2.10787	1.81515	1.48139	3.52105	2.62667	2.03482	2.72412	2.2829	1.24107	1.31902	0.937683	2.11222	0.885475	1.6	1.46816	1.46816	0.836449	2.58543	2.62708	2.11549	4.60714		2.48722	1.86132	1.92687	2.45161	1.36791	1.89502	1.70173	1.45074	0.981413	1.65558	2.23682	2.00499	1.83248	2.3236	1.62869	2.06648	1.35241	0.26435	0.50337	1.67015	1.77087	1.93798	2.97207
180	2.19772	1.3101	2.04337	2.38853	2.26866	1.63671	1.58537	3.31104	2.32812	2.03678	2.73055	2.44488	1.43155	1.34049	0.935342	2.13556	1.19832	1.43857	1.41573	1.41573	0.85514	2.5603	2.59264	1.9375	4.47421		2.60752	1.97996	2.14138	2.80258	1.43185	1.74559	1.88781	1.58024	0.979036	1.62231	2.67498	2.19638	1.7775	2.45038	1.87284	1.94644	1.58676	0.332609	0.561431	1.74739	1.81794	2.24289	2.96983
185	2.49049	1.24926	2.18849	2.53086	2.52035	1.84532	1.48909	3.49252	2.28516	1.95929	2.95434	2.32621	1.39732	1.40833	0.933294	1.92556	1.04888	1.43429	1.24906	1.24906	0.917056	3.03518	2.83848	2.3587	5.1746		2.6203	1.98378	2.02377	2.99484	1.24487	2.1387	1.70334	1.48172	1.06873	1.69534	2.87057	2.32731	1.75509	2.402	1.84741	1.735	1.45259	0.411728	0.607569	1.9144	1.93428	1.98708	2.86927
190	2.56527	1.48562	2.33027	2.56136	2.57802	1.83633	1.56825	3.70253	2.59933	2.14174	2.75305	2.50844	1.3745	1.48218	0.926858	2.07778	1.19832	1.61571	1.46816	1.46816	1.10865	2.81533	2.87292	2.33696	5.16071		2.88045	1.97424	2.22791	2.76774	1.5006	2.04291	1.79935	1.53377	1.11065	1.83813	2.62128	2.23254	1.93941	2.61134	1.90539	2.0831	1.60555	0.380701	0.669777	2	1.9778	2.22868	3.10168
195	2.53612	1.28097	2.1151	2.92883	2.53799	1.90051	1.72187	3.59869	2.62388	2.09318	3.04759	2.7694	1.47173	1.6286	1.0983	2.49222	1.30726	1.69143	1.54869	1.54869	1.09579	2.94724	3.10332	2.2038	5.44048		2.54962	1.9313	2.42413	3.15226	1.32811	2.13257	1.82578	1.50203	1.15193	1.81136	2.55321	2.18018	1.79379	2.19266	2.02645	1.8892	1.48479	0.404902	0.677035	2.14509	2.15453	2.86822	3.37877
200	2.69835	1.36209	2.10425	2.71678	2.35007	1.77535	1.819	3.78859	2.67355	2.1746	2.74727	2.70529	1.47371	1.48819	1.04008	2.26	1.25419	1.62286	1.7191	1.7191	1.09696	3.13693	3.04038	2.49457	5.20833		2.97444	2.09097	2.27178	2.89032	1.30519	2.09349	1.75782	1.67547	1.20164	1.71886	2.56664	2.42145	1.98218	2.48791	1.88708	1.99446	1.95349	0.39125	0.818559	1.89562	2.12789	2.26744	3.44581
205	2.4981	1.42847	2.01084	2.67901	2.77815	1.87227	1.65169	3.6782	2.8019	2.27219	3.03537	2.66198	1.52083	1.38772	1.00731	2.16444	1.3352	1.31429	1.32959	1.32959	0.935748	3.06281	3.20665	2.37772	5.1369		2.94586	2.11546	2.35893	2.96387	1.09288	2.11494	1.69094	1.68182	1.22736	1.85558	2.54554	2.40212	2.15937	2.78148	1.79552	1.94552	1.62791	0.455787	0.842924	2.0501	2.23268	2.07235	3.29609
210	2.53232	1.47087	2.42202	2.77778	2.44708	1.82734	1.7822	3.82788	2.71987	2.12849	2.99743	2.86333	1.56647	1.33963	1.0158	2.27222	1.43156	1.33571	1.57491	1.57491	0.871495	2.97362	2.69596	2.74321	5.09921		3.1594	2.1409	2.49299	2.8271	1.35223	2.2613	1.73517	1.52615	1.18759	1.81988	2.61553	2.43953	1.92413	2.62552	1.89827	1.9843	1.8542	0.420105	0.896319	2.30167	2.25755	2.5814	3.66145
215	2.96958	1.57116	2.26606	2.68628	2.65468	1.90437	1.94223	3.84846	2.63225	2.31976	3.37556	2.73228	1.26984	1.45513	1.05793	2.37667	1.42039	1.69	1.59925	1.59925	0.869159	3.05151	3.44656	2.70788	4.85714		2.90752	2.11609	2.46618	3.18968	1.29795	2.2023	1.83981	1.74911	1.22131	2.13185	2.77181	2.58915	2.10285	2.7623	2.07121	2.3638	1.84705	0.544524	0.826335	2.35491	2.34014	2.52196	3.73296
220	3.06591	1.37795	2.32777	2.92084	2.52985	1.90372	1.88361	3.90599	2.78125	2.54733	3.19807	2.73791	1.45635	1.54401	1.01872	2.16444	1.27654	1.71857	1.55431	1.55431	1.16822	3.23493	3.44418	2.80978	5.75595		3.13759	1.99364	2.31261	2.93677	1.27865	2.16092	1.75836	1.68258	1.22174	2.1359	2.90892	2.44701	2.14257	3.02836	1.97965	2.23084	1.81664	0.461992	0.717989	2.16597	2.32771	2.56718	3.89274
225	3.2142	1.45686	2.29441	2.87291	2.61262	1.9172	2.07017	4.16604	3.02065	2.32467	3.25209	2.95501	1.65228	1.48175	1.0866	2.32778	1.6676	1.58286	1.44757	1.44757	1.07827	3.35176	3.5095	2.65082	5.40278		3.09549	2.1514	2.52285	3.09936	1.54523	2.20766	1.88403	1.8809	1.33305	1.94118	2.99616	2.62656	2.34725	3.08507	2.14954	2.4626	1.7102	0.364877	0.645931	2.17537	2.42718	2.38501	3.42682
230	2.99366	1.68547	2.51293	3.1358	2.83853	1.86842	2.19512	4.22825	2.76283	2.53409	3.56977	2.94938	1.47421	1.60455	1.13575	2.44667	1.5433	1.49	1.44195	1.44195	1.30958	3.65452	3.16508	2.75272	5.40278		3.26917	2.22424	2.50335	2.93161	1.75151	2.49655	1.89698	1.86745	1.39248	1.88357	3.09108	2.53928	2.26935	3.04587	2.31333	2.42382	1.79517	0.397766	0.718507	2.21086	2.2087	2.69251	3.42905
235	3.20152	1.5365	2.36197	3.24328	2.52307	1.89281	1.99059	4.22965	3.00056	2.59	3.54534	2.87964	1.63691	1.63461	1.16238	2.38222	1.42039	1.73286	1.90449	1.90449	1.29673	3.51256	3.68171	2.89538	5.65278		3.23609	2.2764	2.43876	3.07613	1.72135	2.18314	1.92017	2.01321	1.29306	1.96227	3.43432	3.02057	2.42413	3.20434	2.35605	2.2096	1.9347	0.507912	0.947123	2.34551	2.57105	2.62145	3.94413
240	3.09252	1.5542	2.33528	3.12781	2.83107	2.05969	2.0659	4.17259	3.05971	2.4409	3.39678	2.81946	1.52827	1.48647	1.15126	2.41111	1.29469	1.67429	1.33521	1.33521	1.05608	3.84422	3.95724	2.89266	6.09325		3.14962	2.34478	2.34674	2.89032	1.52594	2.18161	1.89428	1.97511	1.32224	1.86694	3.07958	2.87282	2.389	3.07423	2.21668	2.14866	2.18336	0.5408	1.04251	2.63048	2.73357	2.94703	3.90614
245	3.27123	1.54425	2.41118	2.98184	2.63162	1.862	2.05092	4.20674	3.1702	2.5434	3.38714	3.37289	1.68502	1.69386	1.08455	2.36222	1.54888	1.73	1.64232	1.64232	1.1764	3.6897	3.98812	2.92663	6.17262		3.17143	2.34924	2.83364	2.94323	1.21713	2.36475	1.92287	1.89589	1.43138	2.04746	3.09588	2.81733	2.47352	3.16514	2.09563	2.18005	2.33542	0.546075	1.014	2.38727	2.54263	2.63049	3.9162
250	3.50317	1.58886	2.3553	2.76906	2.93284	2.07895	2.03937	4.5449	3.024	2.68269	3.72797	3.18898	1.62202	1.77759	1.20685	2.32444	1.63129	1.71857	1.33708	1.33708	1.14836	3.41206	3.74822	2.95516	6.29167		3.26993	2.36419	2.70993	3.01032	1.51267	2.52337	1.94876	1.95378	1.40134	2.2215	3.55034	2.91771	2.42057	3.29775	2.31536	2.26408	2.30769	0.548557	1.04251	2.94468	2.74512	2.75194	4.07486
255	3.17744	1.66814	2.31026	3.05301	2.9213	2.14249	2.29996	4.3971	3.19475	2.76606	3.52026	3.18391	1.68502	1.70803	1.12932	2.50556	1.62989	1.90429	1.62172	1.62172	1.32009	3.299	3.68646	2.86685	6.10516		3.49023	2.38645	3.00609	3.15484	1.72738	2.51647	2.0534	1.94566	1.46402	2.23124	2.94631	3.20574	2.64358	3.23103	2.49644	2.33056	2.2254	0.530872	0.839813	2.52923	2.63144	2.96512	4.33408
260	3.38276	1.60915	2.5955	3.38417	3.09905	2.10398	2.35045	4.82273	3.14955	2.89063	3.86495	3.26884	1.76786	1.82138	1.23844	2.58667	1.42458	1.52857	1.67416	1.67416	1.29906	3.64824	3.61164	2.98777	6.02976		3.3609	2.35019	2.5454	3.12	1.45356	2.40306	2.01348	1.99594	1.5295	2.18702	3.66826	2.99875	2.75458	3.2035	2.41709	2.56971	2.29785	0.566553	0.926905	2.55532	2.82504	3.47028	4.50279
265	3.49937	1.66187	2.58799	3.53595	3.11465	2.15469	2.34446	4.3957	3.08315	2.80481	4.03151	3.16817	1.74901	1.61056	1.26799	2.48222	1.60056	1.45714	1.62734	1.62734	1.34346	4.15452	4.63302	3.45109	6.36905		3.21203	2.46469	2.93114	2.90452	1.7117	2.48353	1.94498	2.04342	1.60125	2.41258	3.46117	3.0985	2.53666	3.27273	2.7294	2.44044	2.12701	0.490847	0.822188	2.55845	2.8881	3.11499	4.38771
270	3.4474	1.77618	2.45038	3.3297	3.36431	2.33505	2.31707	4.90599	3.6596	2.95194	3.71961	3.43982	1.75347	1.75397	1.27267	2.52222	1.62011	1.72857	1.6779	1.6779	1.25117	4.1093	3.9038	3.15353	6.53373		3.40075	2.59192	2.86654	3.48387	1.54765	2.49655	1.99838	2.05434	1.54722	2.39026	3.89549	3.31234	2.56415	3.85655	2.33876	2.68421	2.43828	0.426931	0.894764	2.77975	2.90053	3.06718	4.67263
275	3.45374	1.66114	2.30359	3.39361	3.17843	2.25802	2.34874	5.27409	3.76842	3.0358	3.53248	3.44207	1.69048	1.80292	1.32885	2.48333	1.57402	1.63	1.7809	1.7809	1.46963	4.26256	4.11639	2.91984	6.2381		3.83684	2.48791	2.78062	3.28903	1.54765	2.59234	2.06904	1.99898	1.5576	2.23813	3.97795	3.29676	2.84725	3.3236	2.93286	2.67498	2.44991	0.479988	0.854847	2.61065	2.91652	3.39018	4.59106
280	3.74525	1.72161	2.51543	3.35512	3.20081	2.47946	2.49936	5.13564	3.7846	3.15939	3.89646	3.5703	1.7872	2.04594	1.29111	2.66778	1.5419	1.82571	1.66667	1.66667	1.52103	3.95226	4.3361	3.36005	6.50794		3.46767	2.43957	3.01524	3.05161	1.67189	2.67893	2.02751	2.07948	1.56062	2.32292	3.82455	3.15586	3.05855	3.49875	2.98067	2.73869	2.51878	0.415141	0.782789	2.92589	2.97869	3.21447	4.93184
285	3.83397	1.71239	2.39533	3.30792	3.4654	2.50321	2.28498	5.03274	3.69587	3.1079	3.7492	3.68448	1.5625	1.89395	1.21533	2.62667	1.56983	1.64571	1.82397	1.82397	1.40421	4.49372	4.41805	3.23098	6.32937		3.65789	2.50255	3.00061	3.26193	1.84922	2.89042	2.05394	1.968	1.73547	2.42678	3.83509	3.35349	2.7887	3.72227	2.68159	2.77008	2.54383	0.45951	0.792639	2.87474	3.06661	3.47416	4.86592
290	3.67554	1.82116	2.69141	3.809	3.51085	2.35687	2.54129	5.28952	3.41016	3.11918	3.88746	3.58493	1.84077	1.93388	1.29257	2.86556	1.80726	1.64571	1.48315	1.48315	1.48715	4.46608	4.33967	3.3519	6.4881		4.00376	2.45802	2.922	3.67097	1.66224	2.78314	2.11435	2.20899	1.74908	2.45112	3.81592	3.6409	2.87474	4	2.74059	2.68236	2.39088	0.532423	1.05702	2.76618	3.05506	3.36305	4.38324
295	3.63878	1.80752	2.53628	3.45243	3.66418	2.42041	2.47754	5.14032	3.81027	3.34625	4.07138	3.81046	1.7004	1.83255	1.31334	2.57889	1.61313	1.49714	1.83895	1.83895	1.54906	4.1093	4.71971	3.61277	7.125		3.57669	2.48314	3.14077	2.98064	1.63329	2.74023	2.06041	2.12443	1.72617	2.46815	4.04123	3.35037	2.63697	3.90492	2.76297	2.6916	2.73524	0.573069	1.01555	3.15866	3.14121	3.43798	4.80894
300	3.80862	1.79941	2.57048	3.62309	3.40841	2.43325	2.30723	5.25959	4.10045	3.07553	4.18264	3.8234	1.79663	1.94976	1.36278	2.70778	1.62849	1.76429	1.69663	1.69663	1.62033	4.23995	4.46793	3.48234	7.0377		3.79474	2.41221	3.01463	3.09419	1.96261	2.79847	2.13484	2.29964	1.67841	2.37404	4.11026	3.38778	2.92973	3.75646	3.02136	2.61219	2.54472	0.502327	0.96423	2.82463	3.37655	3.70801	4.90279
305	3.63878	1.70059	2.59383	3.71605	3.31615	2.32927	2.27942	5.30589	4	3.17656	4.58971	3.89258	1.9127	1.92143	1.35635	2.52444	1.83939	1.76429	1.97004	1.97004	1.17056	4.25879	4.45962	3.61549	7.2381		3.8015	2.5633	3.07983	3.58839	1.79252	2.73257	2.17584	2.26155	1.73158	2.35416	3.8792	3.57668	3.03462	3.80984	2.74161	2.85134	2.71199	0.612473	0.936236	2.98225	3.21581	3.68605	5.17318
310	4.02281	1.98193	2.61635	3.50472	3.35482	2.71245	2.73299	5.4406	3.76507	3.22168	4.28103	3.82058	1.92807	2.00558	1.38326	2.68111	2.04749	1.66143	1.71348	1.71348	1.59813	4.09925	4.44418	3.63315	7.74603		3.97519	2.59129	2.94394	3.34452	1.7491	2.79617	2.26969	2.33139	1.74951	2.65233	4.54362	3.50436	3.10183	4.38365	2.87487	3.09326	2.76476	0.584859	1.00311	2.89875	3.11812	3.23256	4.9095
315	3.88086	1.79499	2.48457	3.5512	3.40163	2.64121	2.63244	5.66137	3.95089	3.37764	4.4328	3.87458	1.94643	1.89223	1.48742	2.87222	1.45112	1.93143	1.82022	1.82022	1.5736	4.37312	4.95962	3.38315	7.25		4	2.65363	3.33699	3.67613	1.93245	2.56705	2.1877	2.24759	1.78193	2.71278	4.12943	3.73317	3.01833	4.06839	2.8708	2.88273	2.89445	0.561899	1.1099	3.119	2.98135	3.53488	5.30614
320	3.85932	1.86099	2.57631	3.98112	3.56377	2.44416	2.4279	5.36436	3.90346	3.54586	4.49582	3.88076	1.92857	1.87849	1.57226	2.54111	1.76257	1.8	1.70037	1.70037	1.64135	4.83668	4.94299	3.96467	8.10318		3.96391	2.63613	3.17611	3.22839	1.8263	2.87893	2.35221	2.38141	1.8137	2.64381	3.99137	3.44015	3.05143	4.24771	3.0824	2.80702	3.12254	0.614645	1.27527	3.32463	3.17673	3.60853	5.16201
325	3.77947	1.78134	2.74812	3.86565	3.81072	2.82285	2.31365	5.36015	3.83371	3.42276	4.68039	3.94488	2.03423	2.04251	1.52896	2.85222	1.77654	1.63286	2.14232	2.14232	1.80374	4.92337	5.17815	3.93071	7.625		3.93609	2.61641	3.26752	3.25677	1.93124	2.59004	2.24541	2.37786	1.75492	2.66694	4.25887	3.61783	3.1502	4.33444	3.06511	2.75716	2.97943	0.628917	1.28408	3.75887	3.23712	3.79587	5.52626
330	4.0076	1.89012	2.59383	3.85548	3.70556	2.68806	2.54129	5.60898	3.76786	3.54193	4.73505	4.04668	2.15625	2.2675	1.56085	2.75667	1.73743	1.59	1.91199	1.91199	1.96963	4.60804	4.62352	3.75543	7.1746		4.1406	2.62309	3.35893	3.46452	1.94089	2.76782	2.15426	2.34891	1.85693	2.67099	3.94727	3.49314	3.13544	4.23686	3.32146	2.81625	3.12254	0.651877	1.19596	3.29854	3.68206	4.1783	5.59776
335	4	2.05383	2.49208	3.9252	3.87178	2.86521	2.54386	5.67493	4.1635	3.40265	4.58714	4.04837	2.30258	2.22842	1.55588	2.51444	1.75559	1.83	2.11049	2.11049	1.56776	4.50879	4.99763	3.91848	6.86905		4.17669	2.64154	3.5387	3.3471	1.95175	2.72031	2.3247	2.41747	1.83078	2.71278	4.42186	3.53803	3.03004	4.47373	3.28993	2.95383	3.09123	0.605647	1.30119	3.43111	3.43606	3.73256	5.28715
340	3.90114	1.85804	2.71143	4.06173	3.90841	2.74839	2.60077	5.60617	4.1144	3.60275	4.52669	4.01575	1.82093	2.19493	1.46401	2.59444	1.82263	1.70143	1.91573	1.91573	1.76635	4.44975	5.18884	3.90625	7.39881		4.03083	2.70802	3.3766	3.51097	1.89626	2.6023	2.32255	2.48426	1.87314	2.80162	4.30105	3.77307	3.39562	4.41618	3.1709	3.17728	2.75224	0.556624	1.12805	3.39875	3.56217	4.31395	5.72514
345	4.37896	1.92109	2.47623	4.02324	3.96947	2.81579	2.75652	5.71515	4.14342	3.56547	4.71833	4.09336	1.86012	2.15801	1.56846	2.73333	2.03073	1.69143	1.90449	1.90449	1.84112	5.45101	5.58551	4.15489	8.51389		4.10977	2.61928	3.49604	3.62452	2.25332	2.77471	2.40076	2.45734	1.96931	2.92333	4.8466	3.87656	3.25662	4.51293	3.29603	2.92983	3.16547	0.723239	1.32919	3.6357	3.61101	4.26098	5.58883
350	4.19772	1.98636	2.74062	3.90341	4.09837	2.85751	2.6012	5.99439	4.31083	3.82639	4.75177	4.24297	1.85913	2.20309	1.57607	2.67333	1.92039	1.67286	1.84644	1.84644	1.78271	5.09422	5.33254	3.71467	8.01786		4.33609	2.68639	3.59415	3.48387	1.9421	3.02529	2.24218	2.47435	1.93516	2.79959	4.43241	3.77806	3.2775	4.74145	3.31638	3.32225	3.21825	0.651257	1.06998	3.65762	3.87389	4.10336	5.45363
355	4.46641	1.87131	2.62719	4.23094	4.22999	2.99358	2.87206	5.88073	4.52623	3.76508	4.77685	4.27559	1.90179	2.02447	1.57929	2.83667	1.9162	1.64429	1.82771	1.82771	2.09463	5.12437	5.72209	3.90353	7.83135		3.90902	2.79294	3.40097	3.44774	2.22437	2.76322	2.2616	2.4289	1.78842	2.77972	4.52157	3.79988	3.38085	4.63553	3.26653	3.25854	3.0805	0.630158	1.08554	3.55637	3.36323	3.98837	5.84358
360	4.27757	1.98193	2.59633	4.17865	4.2232	2.87612	2.81301	6.00094	4.41797	3.92153	4.74341	4.41339	1.94742	2.19322	1.66267	2.72778	1.81425	1.73714	2.27903	2.27903	2.0993	5.27638	5.3266	3.90353	8.33532		4.31128	2.69402	3.34186	3.5471	2.03498	2.97395	2.33225	2.66607	1.97925	2.88316	4.72771	4.05611	3.23676	4.89825	3.33164	3.30194	3.37746	0.669252	1.34007	3.7881	3.78064	3.86305	5.89274
365	4.41318	1.90597	2.77731	4.24982	4.04478	3.03851	2.94309	6.29514	4.625	3.79745	4.74277	4.27672	2.14732	2.3143	1.68285	2.85222	1.76257	1.76143	2.24906	2.24906	2.06308	5.02261	5.38599	3.94565	8.45238		4.06015	2.70452	3.48751	3.73548	2.01086	2.8567	2.55717	2.63332	2.02918	2.81055	4.53404	3.98878	3.63493	4.76731	3.57579	3.28993	3.54204	0.663047	1.42665	4.02505	3.82327	4.15375	5.88156
370	4.53739	1.90229	2.64387	4.19463	4.07734	2.84917	2.81429	5.95977	4.46205	3.76263	4.74855	4.34871	1.90873	2.35809	1.62522	2.69	1.98743	1.80286	1.87453	1.87453	2.12383	5.13442	5.23634	4.41984	8.63294		4.18722	2.74841	3.53992	3.81032	2.07117	2.96169	2.44984	2.60564	1.90793	3.06004	4.57718	3.67269	3.41497	4.70559	3.11089	3.17636	3.34347	0.705244	1.4168	3.85595	3.90497	4.30233	6.27374
375	4.79087	1.97419	2.83153	4.00654	4.44098	3.25032	2.84211	6.18522	4.66127	3.72045	5.12733	4.35939	2.12103	2.26406	1.58923	2.86444	1.95531	1.62714	1.79963	1.79963	1.9007	5.43844	5.82898	4.28125	8.75198		4.33609	2.75572	3.53504	3.41419	1.91677	2.85134	2.50539	2.62113	2.08731	2.90183	4.45542	4.14526	3.38646	4.73061	3.47101	3.10803	3.62254	0.7009	1.37325	3.76931	3.81439	4.64987	6.14525
380	4.76679	2.07411	2.71226	3.84532	4.02985	2.7715	3.06333	6.13377	4.5625	4.05002	5.31897	4.65804	2.15823	2.42636	1.71855	2.59444	1.94832	1.76286	2.22285	2.22285	2.03388	5.8304	6.05938	4.8356	9.00198		4.18872	2.97233	3.60573	3.55097	2.18818	2.82759	2.38889	2.51447	2.04971	2.89899	4.77661	4.20012	3.56517	5.37948	3.51577	3.19021	3.50089	0.686007	1.23535	3.619	3.7913	4.31395	6.20894
385	5.09632	1.98931	2.88741	4.15831	4.38195	2.80359	3.08344	6.11366	4.57422	4.09662	5.10933	4.2919	2.12897	2.36496	1.71826	2.81222	1.77235	1.81429	2.11236	2.11236	1.9229	5.77638	5.70071	4.84511	8.36905		4.01128	2.72265	3.45643	3.66323	1.86369	2.99387	2.51672	2.61351	2.10417	2.98174	4.76989	4.34227	3.78004	5.39783	3.58291	3.40905	3.15564	0.578964	1.25039	3.68476	4.0151	4.86693	6.74302
390	5.06717	1.96055	2.8407	4.36383	4.3806	2.87227	3.09071	6.01216	4.46819	3.86856	5.11447	4.53487	2.26141	2.2602	1.77238	2.90889	2.05726	1.69714	2.29214	2.29214	2.00584	5.8392	6.05226	4.63587	8.59524		4.5406	2.93766	3.79159	3.87871	2.22195	2.9249	2.47411	2.73819	1.95764	3.16268	4.82167	4.22257	3.57485	5.14512	3.50051	3.72576	3.39624	0.60875	1.04251	3.79645	4.03464	4.85788	6.56313
395	5.22053	2.13791	2.90742	4.2215	4.27815	2.98139	3.0368	6.21001	4.37221	3.99166	5.34598	4.45332	2.17559	2.3903	1.83938	2.99778	1.91899	1.87286	2.00374	2.00374	2.04089	5.72362	5.75534	4.52581	8.34524		4.31429	2.87595	3.62096	3.67613	2.03257	3.04138	2.45523	2.60665	2.09358	3.13022	4.95973	4.27743	3.68432	5.05505	3.61648	3.40074	3.70036	0.665839	1.4816	4.22756	4.39787	4.64212	6.64693
400	5.20025	1.99299	2.86906	4.21496	4.31886	3.08216	3.26187	6.54116	4.49163	4.19274	5.5537	4.62598	2.20833	2.50623	1.78321	2.89889	2.09497	1.78	2.30337	2.30337	2.17173	5.63317	5.76009	4.47419	9.0377		4.56616	3	3.69774	3.36129	2.2497	3.06667	2.56473	2.73768	2.08926	3.13469	4.74113	4.34726	3.70621	5.29358	3.47813	3.34811	3.54115	0.731306	1.39762	4.17954	4.29041	4.6783	6.47263
405	5.12674	2.11836	2.60968	4.16848	4.26119	2.94544	3.26273	6.30543	4.53683	4.15939	5.3537	4.51294	2.32688	2.49077	1.91867	2.77	1.80307	1.77	2.40449	2.40449	2.16238	6.13065	6.7981	4.84783	10.3036		4.50526	2.72106	3.88239	3.43613	2.04946	3.07356	2.60572	2.76308	2.24011	3.20162	5.24449	4.46072	3.76833	5.56464	3.55239	3.46999	3.87388	0.668942	1.42509	3.91127	4.57904	4.6447	6.77207
410	4.7744	2.03392	2.64387	4.14742	4.32429	2.98331	3.35687	6.50514	4.65234	4.09416	5.66817	4.61136	2.2877	2.43581	1.96723	3.08444	1.81844	2.18714	2.20974	2.20974	2.19626	6.05276	6.82304	5.26766	9.84921		4.66241	2.84065	4.04997	3.80516	1.89867	3.15172	2.63754	2.87913	2.14588	3.17039	4.71716	4.66646	4.00662	5.04671	3.62157	3.40905	3.83631	0.766677	1.35925	3.66388	3.89787	4.82558	6.4324
415	5.2218	2.10324	2.78482	4.37908	4.52917	2.99872	3.48738	6.38588	4.57924	4.25797	5.41286	4.57312	2.24901	2.43924	1.81802	2.77333	1.9176	1.72857	2.24157	2.24157	1.95911	6	6.15321	4.57065	9.60318		4.74812	2.80693	3.87264	3.62194	2.02654	3.22376	2.54962	2.92534	2.11087	3.13793	4.90892	4.69327	3.89206	5.3603	3.79349	3.75346	3.43739	0.664908	1.37429	3.89144	4.2611	5.4031	6.63687
420	5.12674	2.0708	2.88574	4.40378	4.43216	2.85815	3.33505	6.37652	4.91797	4.27317	5.60772	4.74241	2.06002	2.45341	1.77852	2.83	1.92877	1.74286	2.07491	2.07491	1.93108	5.97613	6.18171	4.65625	9.78571		4.48196	2.88581	3.805	3.73548	2.35706	3.20536	2.61111	2.94566	2.20143	3.2641	5.09108	4.63279	4.08961	5.49791	3.72126	3.72853	3.81306	0.73534	1.48056	4.23591	4.52043	4.69767	6.65028
425	4.89607	2.05199	2.83486	5.00436	4.28833	3.00578	3.10783	6.78999	5.00446	4.14272	5.51061	4.66367	2.1999	2.51567	1.82885	2.97667	2.04609	1.66857	2.17416	2.17416	2.14135	6.00126	6.70784	4.80299	9.64087		4.5391	3.05821	3.77087	3.71226	2.43305	2.93946	2.5863	2.93906	2.09077	2.9854	5.18504	4.87656	4.05346	5.66556	4.1119	3.79409	4.03488	0.768849	1.37792	4.16806	4.57371	4.88372	7.40782
430	5.22307	2.19875	3.04253	4.39579	4.33446	3.043	3.37184	6.65622	4.82366	4.28641	5.51833	4.63723	2.39087	2.63461	1.92364	2.81667	1.9986	2.01571	2.50187	2.50187	2.30374	6.34548	6.52138	4.40217	9.81151		4.67444	2.98505	3.73065	4.08258	2.29674	3.29502	2.79018	2.968	2.20683	3.24625	5.19942	4.5717	3.92973	5.52043	3.58189	3.61496	3.81395	0.79336	1.72784	4.40501	4.79396	4.84884	7.21676
435	5.31305	2.1792	2.84904	4.32462	4.63704	3.06033	3.38297	6.82554	5.01786	4.43649	5.51125	4.97244	2.27629	2.76428	1.84669	2.86111	2.18156	1.56143	2.31461	2.31461	2.18925	5.97864	6.52969	5.15081	10.0337		4.58872	2.94975	4.01584	4.09677	2.43908	3.24751	2.54854	2.92103	2.23298	3.31318	5.03547	4.60536	3.82179	5.79817	3.75585	3.59834	4.03667	0.727893	1.63712	4.40919	4.44494	5.10207	7.31173
440	5.42839	2.08481	3.25688	4.8809	4.55292	2.88062	3.39795	7.00655	5.18415	4.47572	5.92154	4.9685	2.44296	2.64534	1.93271	2.77222	2.14525	1.86	2.62921	2.62921	2.39953	6.4108	6.62352	5.05571	9.67064		4.56992	2.9736	4.06459	3.79226	2.24246	3.32797	2.71467	3.04901	2.32462	3.43205	4.93001	4.83853	4.05397	5.88157	3.55036	3.90305	3.99374	0.780329	1.63712	4.51983	4.39343	5.11628	7.23911
445	5.47655	2.30973	3.01334	4.7756	4.51492	3.30103	3.5015	6.7217	4.91462	4.34772	5.94019	4.75591	2.26736	2.63074	1.92715	2.81111	2.09776	1.73286	2.20038	2.20038	2.28505	6.42588	7.02494	5.32337	10.6925		4.80526	3.08079	3.96648	3.65419	2.06996	3.21992	2.81985	3.03174	2.22628	3.04706	4.59348	4.9495	4.1003	5.84154	3.88505	3.71837	4.41145	0.764815	1.5324	4.32046	4.30195	5.26486	6.94078
450	5.29151	2.32043	2.71643	4.68337	4.62619	3.38447	3.27514	6.90646	5.08817	4.41981	6.15177	4.7739	2.24752	2.76428	1.89321	2.81333	2.21369	1.71714	2.41573	2.41573	2.2243	6.19095	6.78147	5.20788	10.8492		4.78271	3.11196	4.03047	4.14581	1.97226	3.30575	2.82416	2.97232	2.20942	3.07748	4.95014	4.85536	3.81772	6.16347	3.61445	3.8181	4.00358	0.711759	1.5718	4.5	4.71758	5.38631	7.55754
455	5.80482	2.1663	2.87239	4.74437	4.5251	3.31258	3.51348	6.529	5.08538	4.54291	5.74212	4.9162	2.50794	2.74538	1.9962	3.08667	1.8352	2.02857	2.41011	2.41011	2.21846	5.94724	6.6829	5.12364	9.95436		4.81203	3.01877	3.78733	3.86839	2.43908	3.19387	2.64401	3.13433	2.18046	3.13225	5.33174	5.02993	4.08096	5.94912	3.7884	3.79409	4.04383	0.80515	1.58683	4.53967	4.67051	5.33462	7.39888
460	5.85425	2.29683	2.9191	4.84822	4.36703	3.33825	3.6119	6.73153	5.19754	4.53261	5.85659	4.91845	2.35813	2.79991	1.96372	2.69889	2.1271	1.70143	2.38015	2.38015	2.51519	6.22362	7.00356	5.31794	10.1528		4.99023	3.21247	4.06094	3.69419	2.18094	3.10192	2.92503	2.93728	2.25416	3.19351	5.53883	4.87781	4.13035	5.80317	4.13225	3.87627	4.0805	0.899162	1.831	4.63257	4.63321	5.31395	7.31844
465	5.58935	2.28097	2.96831	5.02179	4.89145	2.98395	3.56697	7.04116	5.38281	4.58068	6.18649	5.20754	2.19196	2.77372	2.02428	2.91556	2.23743	1.94429	2.28839	2.28839	2.50584	6.15955	7.56888	5.30842	10.3829		4.79624	3.23505	4.01036	3.81548	2.26417	3.55096	2.81661	3.4289	2.39205	3.38823	5.4813	5.2581	4.21079	6.46455	4.1882	4.02308	4.65206	0.871859	1.68844	4.62317	4.70426	5.57364	7.55531
470	5.92649	2.28687	3.02085	4.75962	4.66961	3.32221	3.61104	7.20019	5.29353	4.75331	6.16592	5.21204	2.34474	2.74453	1.83616	2.93667	2.13687	1.82429	2.64981	2.64981	2.24299	6.74498	7.18527	5.40625	10.4504		4.73384	3.19466	4.38026	4.05419	2.18456	3.41149	2.87702	3.17115	2.36049	3.23732	5.76222	5.09289	4.29786	6.29191	3.94201	3.96953	4.34884	0.736891	1.68637	4.3643	4.78952	5.79328	7.98436
475	5.69328	2.30937	2.98916	4.94263	5.05156	3.19127	3.49465	7.51497	5.44085	4.63757	5.82572	5.14342	2.375	2.6754	1.94119	2.81222	2.15503	1.85429	2.46629	2.46629	2.51402	6.57915	7.20665	5.5462	10.3075		4.83759	3.20738	3.99634	3.85677	2.46924	3.20766	2.75728	3.19477	2.30192	3.09371	5.36337	5.02556	4.14053	6.39032	4.39573	4.09695	4.38998	0.802048	1.37325	4.37369	5.1643	5.53359	7.95307
480	5.90748	2.18473	2.9558	4.36747	4.81615	3.49294	3.54771	6.94902	4.90792	4.47131	6.29196	5.11136	2.38889	2.89738	2.0907	2.70889	2.1676	2.16	2.81273	2.81273	2.40187	6.76256	7.32542	5.75544	11.3254		4.91805	3.21533	3.8574	4.15613	2.45115	3.14866	2.83873	3.30295	2.37346	3.17322	5.60786	5.14588	4.4557	6.39867	4.39166	4.09511	4.24687	0.846106	1.78746	4.51253	4.71936	5.60207	7.65028
485	6.0076	2.22087	3.19349	4.89688	4.72999	3.59949	3.4908	7.37465	5.3365	4.68367	6.14019	5.13892	2.26488	3.02533	2.01521	2.86889	2.09916	1.90143	2.6236	2.6236	2.24416	6.54523	7.7886	5.38044	10.8909		5.0218	3.19434	4.17307	4.04645	2.11701	3.21916	3.07282	3.35983	2.33953	3.67708	5.73346	4.83666	4.20876	6.14846	4.47304	4.21237	4.4517	0.86162	1.6366	4.83925	4.9476	5.77778	7.84804
490	6.41572	2.17773	2.85488	4.94481	5.11601	3.36264	3.65212	7.24743	5.56808	4.81461	6.30096	5.23228	2.33532	2.95835	1.99561	2.97222	2.30168	1.78	2.40075	2.40075	2.39135	6.89824	7.76603	5.26766	10.4405		5.01429	3.26081	4.46862	3.94968	2.33655	3.26743	3.0712	3.40884	2.4558	3.39351	5.6395	5.06733	4.32587	6.54796	4.50661	4.16251	4.49732	0.751474	1.52462	4.51879	4.83037	5.89147	8.4648
495	5.71736	2.1958	2.95663	5.10457	4.88942	3.5122	3.5246	7.48924	5.7779	4.96028	6.45145	5.27897	2.38591	2.7003	1.92539	3.06	2.20531	1.84143	2.68539	2.68539	2.23248	6.39322	7.75297	5.6712	11.2163		5.27895	3.33429	4.40402	4.33032	2.32087	3.67586	2.96116	3.29939	2.44694	3.59473	5.53212	5.29426	4.46385	6.22352	4.33978	4.32779	4.44186	0.811666	1.56662	5.08873	4.8659	6.3553	8.13184
500	5.92649	2.32559	3.09758	5.36529	4.9559	3.45315	3.50064	7.52994	5.45703	4.48848	6.22894	5.22553	2.19841	2.94375	1.96167	2.81667	2.33101	1.73143	2.62921	2.62921	2.58879	7.13191	8.05344	6.02581	12.0913		5.04737	3.03626	4.13406	3.94452	2.23522	3.41456	3.01456	3.36618	2.47136	3.48803	5.54842	5.25935	4.40326	6.50375	4.39573	4.19298	4.59302	0.684145	1.48626	4.6023	5.40142	6.09044	8.4324
505	6.02028	2.47234	3.17348	4.76761	4.93216	3.86842	3.74626	7.46445	5.40681	4.64787	6.37942	5.58436	2.48413	3.23572	2.03716	3.2	2.10754	1.79857	2.77715	2.77715	2.42056	7.35176	7.74822	6.03261	12.0179		5.00226	3.14536	4.57892	3.65548	2.20748	3.36322	3.07443	3.43906	2.38967	3.61866	5.71812	5.47132	4.53157	6.54379	4.47609	4.40074	4.62165	0.865343	1.58165	4.97808	4.76909	6.05426	8.41341
510	5.92142	2.35435	3.38115	5.07553	4.67028	3.49807	3.6457	7.21609	5.23996	4.68661	6.53119	5.20585	2.47569	3.11335	1.95202	3.26778	2.32402	2.17286	2.70225	2.70225	2.21729	7.02764	7.6829	5.80978	10.5516		5.06541	3.12055	4.36929	4.0271	2.33534	3.64215	2.99191	3.39995	2.42317	3.54402	5.465	5.41397	4.44145	6.66389	4.3764	4.52909	4.48301	0.743717	1.47175	4.9405	4.91297	5.66538	8.13184
515	6.15209	2.18621	3.08257	4.96732	5.09566	3.76316	3.66624	7.31151	4.91183	5.0152	6.55884	5.33858	2.312	3.03478	2.03774	3.14111	2.19274	2.02	2.94569	2.94569	2.54907	6.42714	8.02613	5.49592	11.1468		5.09925	3.26113	4.49238	3.92645	2.76116	3.33027	3.00917	3.47308	2.59282	3.80974	5.49473	5.61845	4.73371	6.90158	4.20753	4.79132	4.35152	0.75892	1.56713	4.86743	5.07993	6.09173	8.0905
520	5.67554	2.1722	3.16681	5.14524	5.04206	3.75802	3.94352	7.53789	5.25725	4.872	6.52862	5.09336	2.51687	2.98368	2.11439	3.05444	2.10894	1.87857	3.11236	3.11236	2.41589	6.91834	8.00713	5.84919	11.3135		4.96842	3.28213	4.43754	3.81548	2.41978	3.58237	3.2562	3.41696	2.56646	3.70183	5.96932	5.60162	4.56466	6.66889	4.10885	4.15328	4.7907	0.877133	1.65837	5.06159	4.70604	5.78424	8.01006
525	6.44107	2.30863	3.3236	5.16921	5.33039	3.90244	3.79375	7.49532	5.37723	5.05051	6.51961	5.19123	2.50893	3.12452	2.22382	2.92	2.40224	1.83429	2.69288	2.69288	2.38435	7.6696	8.33848	6.01495	12.1686		5.14586	3.21692	4.46252	3.77419	2.74668	3.16475	3.02751	3.42839	2.52431	3.70264	5.71524	5.42768	4.55092	6.61385	4.2645	4.21976	4.53131	0.909091	1.7465	4.92902	5.2087	6.08656	8.70391
530	6.41191	2.30199	3.45204	5.4931	5.1194	3.58665	4.08943	7.68195	5.2567	5.0618	6.56977	5.24916	2.58036	3.11894	2.02223	3.01111	2.52374	1.89571	3.12172	3.12172	2.34696	7.12688	7.9133	5.87636	12.0496		4.91729	3.19529	4.32724	3.92258	2.40772	3.37548	3.20766	3.71381	2.57489	3.55578	5.66059	5.7419	4.62373	6.55296	4.08545	4.25392	4.822	1.08563	1.92379	5.1023	5.24689	6.45736	8.87263
535	6.24715	2.23931	3.05004	5.28613	5.21777	3.78883	4.01669	7.72731	5.48717	5.06032	7.01158	5.38526	2.37252	3.36711	2.06875	3.20444	2.49302	1.95143	2.84831	2.84831	2.69743	6.92588	8.14252	5.59647	11.6349		5.20902	3.4014	4.20719	3.97419	2.41616	3.56169	3.23625	3.68741	2.54874	3.48276	5.40556	5.89027	4.9058	6.54295	4.16785	4.75531	4.41413	0.886751	1.82219	5.1524	5.16519	6.61369	8.83799
540	6.3891	2.30199	3.29274	5.23529	4.846	4.03081	3.84467	7.74977	5.66629	4.91368	7.15177	5.44826	2.2748	3.17089	2.01317	3.15667	2.11452	1.85286	2.61611	2.61611	2.4229	6.90829	8.55226	5.37772	12.2698		4.86842	3.30089	4.51615	4.09677	2.42823	3.60843	3.20388	3.49492	2.5282	3.43367	5.59827	5.90025	4.79379	6.98082	4.5707	4.66851	4.58139	1.01737	1.93727	5.38622	4.8952	6.43152	8.45028
545	6.60456	2.28835	3.44287	5.12636	5.41248	3.82221	3.75909	7.66417	5.31417	5.14272	6.89518	5.53037	2.29117	3.26964	2.12259	3.21333	2.40084	1.87714	2.32584	2.32584	2.21495	7.87688	8.11401	6.05706	11.9444		5.2797	3.49332	4.50884	3.77161	2.81906	3.16398	2.89105	3.55917	2.33802	3.49128	5.80633	6.09539	4.72098	6.57548	4.25229	4.42936	4.63685	0.903816	1.77916	5.61273	4.76909	5.90181	8.51285
550	6.41698	2.17699	3.2769	4.9833	5.16757	3.74583	3.87291	7.49392	5.34989	5.10201	6.90997	5.20585	2.32937	3.19408	2.23259	3.06333	2.36313	2.15571	2.99813	2.99813	2.69977	7.50879	8.74941	6.03397	12.0397		5.31429	3.49968	4.43388	4.10065	2.40651	3.57625	3.32794	3.61275	2.57165	3.8215	5.5302	5.88342	4.57739	7.01835	4.48525	4.49031	4.75403	0.944462	1.94557	5.39666	5.43073	6.55685	9.26927
555	6.38657	2.21571	3.51543	5.22585	5.39077	3.97689	3.95978	7.68382	5.61607	4.97156	6.63794	5.41282	2.2753	3.14212	2.15155	3.29	2.63966	1.95429	3.02247	3.02247	2.42173	8.08794	8.83254	6.55571	11.8631		5.32782	3.32157	4.47898	4.08258	2.59952	3.52797	3.17961	3.45861	2.62957	3.62475	5.77948	6.03117	4.66548	7.16681	4.75382	4.241	4.43649	0.888303	1.62208	4.96555	5.35968	6.36693	9.16089
560	6.4512	2.13717	3.28524	5.46478	5.1445	4.08793	3.89046	7.60898	5.55469	5.25895	6.90804	5.33802	2.31101	3.27437	2.11147	3.14889	2.5433	1.88143	2.79214	2.79214	2.28154	7.73995	8.36936	6.14538	11.7302		5.21053	3.35719	4.53809	4.09677	2.69602	3.59464	3.31607	3.48603	2.58418	3.38134	5.90892	6.05549	4.91853	7.01668	4.74263	4.69437	4.7898	0.86162	1.6423	5.00418	5.04174	6.52455	8.91508
565	6.41825	2.35767	3.6347	5.4626	5.14858	4.29333	3.77578	8.02853	5.74609	5.44139	7.0045	5.34702	2.52034	3.32374	2.29345	2.85444	2.71229	1.97286	3.09738	3.09738	2.56659	7.05528	8.53444	5.7894	12.2659		5.59248	3.51463	4.69165	4.28903	2.40893	3.57931	3.2945	3.69172	2.50205	3.42596	5.99233	5.8803	4.8997	7.30525	4.3296	4.6325	4.90787	0.79367	1.73561	5.11273	5.05773	5.86305	8.99106
570	6.36755	2.3042	3.28107	5.49673	5.47354	4.17394	4.05905	8.03274	5.60324	5.24522	7.34084	5.55287	2.51835	3.307	2.24078	3.23	2.42458	1.83143	2.96067	2.96067	2.61565	7.52513	8.90024	6.23777	12.7857		5.36316	3.45229	4.38879	4.19484	2.53197	3.24981	3.41748	3.6808	2.47634	3.57647	5.41323	6.19327	4.97811	7.08424	4.67447	4.93537	5.05993	0.853242	1.6563	4.92589	5.7913	6.29587	9.60335
575	7.07731	2.47972	3.54379	5.47131	5.11669	3.6181	4.22251	8.52666	6.25949	5.31977	7.12926	5.65579	2.4003	3.40575	2.14336	3.13556	2.32682	2.14714	2.96629	2.96629	2.51168	8.31407	9.01663	6.69022	13.252		5.01278	3.42621	4.55454	4.41677	2.45477	3.37624	3.39968	3.63535	2.56797	3.99554	6.04314	6.15212	4.90886	7.24937	4.60224	4.65743	4.7102	0.892026	1.78227	5.2881	5.41829	6.73514	9.33073
580	6.79214	2.26401	3.65972	5.35802	4.93351	3.65276	4.27813	8.3391	6.11998	5.41687	6.90289	5.55343	2.28522	3.29583	2.14511	3.18778	2.31704	2.03571	3.1236	3.1236	2.3493	8.04146	8.96437	6.44701	12.3075		4.93759	3.21279	4.5326	4.26581	2.45597	3.87586	3.4164	3.69198	2.64794	3.85882	5.6395	6.00249	4.88544	6.8407	4.54018	4.82087	4.96512	0.952839	1.76309	5.64614	5.61101	6.76615	9.5676
585	6.73384	2.58481	3.61551	5.36529	5.14858	3.67715	4.3911	8.53508	6.26339	5.10005	7.22251	5.58549	2.32143	3.18463	2.11673	3.30889	2.3324	2.08143	2.73596	2.73596	2.38084	8.58794	9.51425	6.11821	12.7103		5.39248	3.32697	4.50091	4.34968	2.5959	3.59234	3.60302	3.68741	2.65917	3.7854	5.94247	6.06297	4.99796	7.22936	4.69176	4.88273	4.99732	0.991623	1.96682	5.74739	5.38011	6.79974	9.64358
590	7.10393	2.51954	3.70475	5.77197	5.21031	3.59435	4.18186	8.43499	6.12221	5.15645	7.29196	5.71035	2.40179	3.3903	2.17905	2.81667	2.38268	2.03143	3.01311	3.01311	2.68692	8.36558	9.5285	6.64266	12.9861		5.20752	3.39663	4.70201	4.49548	2.60676	3.59157	3.37918	3.79685	2.75319	3.91602	5.67114	6.50436	5.27444	7.24187	5.09563	4.92336	5.53041	0.950977	1.9041	5.56054	5.38988	6.49225	9.99218
595	7.20532	2.49226	3.63303	5.56064	5.2517	3.86457	4.30295	8.41908	6.23828	5.57087	7.66688	5.68279	2.45288	3.52125	2.15184	3.41	2.53911	1.95143	3.39513	3.39513	2.47547	8.07286	9.13895	6.83424	13.2718		5.40075	3.26908	4.58806	4.19742	2.55127	3.6728	3.68554	3.84281	2.69051	3.8215	5.95302	6.50997	5.13238	7.43787	4.58901	5.09141	4.94991	0.914986	2.00259	5.38205	5.57105	6.7739	9.82346
600	7.05577	2.40855	3.8382	5.42411	5.09362	3.62259	4.30253	8.51356	5.93638	5.19961	7.58714	5.65467	2.36359	3.42164	2.16589	3.17778	2.74022	2.38143	3.06929	3.06929	2.54673	8.42462	8.47625	6.6413	12.8909		5.29925	3.36514	4.51127	4.00129	2.88661	3.7249	3.51295	3.83367	2.67603	4.23286	6.10642	5.81297	5.11558	7.14762	5.07528	4.61773	5.58408	0.97704	2.06739	5.75052	5.72824	6.7584	9.29609
[truncated: 29 more columns]

## Sheet: Fig.4-S2DE
Fig.S10 D
Test Potential (mV)	Control								siRNA2								siRNA4
-100	-1.73296	-1.56136	-1.32879	-1.75925	-1.491	-8.48285	-3.19522		-1.99672	-2.08446	-1.42997	-1.11526	-9.92763	-3.78491	-3.94755	-1.02573		-1.01725	-0.64087	-1.34747	-3.4417	-2.11313	-0.83145	-1.83439
-80	-0.85013	-0.70971	-0.47684	-0.5565	-0.62779	-5.43109	-1.85627		-0.98528	-1.02179	-0.79782	-0.60832	-7.4834	-2.59812	-2.53048	-0.47048		-0.27805	-0.34005	-1.08924	-2.50075	-1.50868	-0.53417	-1.07284
-60	0.174386	0.244456	0.476837	0.969382	0.601632	-2.11497	-0.27388		0.25286	0.06812	0.143869	0.152081	-3.90418	-1.16388	-1.09823	0.038147		0.284831	-0.06539	0.07512	-1.43687	-0.41771	-0.05574	-0.25014
-40	1.3079	1.39576	1.67211	2.8124	1.75258	1.9483	1.75194		1.31662	1.55767	1.14659	0.973318	1.86967	1.12264	0.961582	0.563727		1.30886	0.457764	3.17852	0.945197	0.663426	0.320504	0.62814
-20	2.98636	2.55496	3.01997	4.86486	3.24358	7.52307	5.36449		2.70298	4.6503	2.43705	2.23052	10.7989	4.54556	3.85139	1.66151		2.13623	1.12043	9.9816	5.20494	2.76673	1.32847	2.23462
0	4.34875	4.25038	4.72387	7.4798	5.49316	15.0289	12.5852		4.16783	9.60486	4.73894	3.87806	24.0279	10.1496	7.92546	2.93732		3.852	2.53732	21.7708	12.5546	6.27551	3.14001	4.06345
20	6.22341	6.15871	7.15256	10.0409	7.7689	24.8623	24.9444		6.78362	20.2633	7.82558	6.52427	42.9883	20.1251	13.2293	7.58701		6.01535	7.18907	37.9967	24.893	13.5978	6.86065	7.65997
40	8.99179	9.4707	10.4396	13.5773	12.7999	38.4085	45.3025		10.8643	36.2669	14.5743	11.7812	66.3051	33.1111	21.9291	13.9872		8.61274	63.2281	57.8895	43.5427	25.6967	14.1533	12.8519
60	14.267	14.1469	17.5158	18.6636	20.874	56.742	73.1726		15.2762	58.4602	28.207	21.8642	95.1932	51.7882	33.6908	23.9478		12.6817	67.9626	82.1111	67.944	44.8083	28.065	18.7608
80	22.8119	26.3066	30.7782	27.6513	31.5988	79.0928	130		26.1666	86.6935	49.312	39.0392	128.499	77.16	52.5429	41.6607		19.382	81.7915	111.215	98.7752	69.527	50.6583	28.8833
100	38.6592	42.7483	54.5311	40.9115	50.1622	104.61	177.432		40.4314	117.475	78.683	66.2363	163.095	108.887	77.7161	72.4072		32.8573	118.447	140.794	133.065	102.915	83.8142	44.1198
120	67.1823	71.5231	96.1431	70.6631	73.2596	134.887	211.867		65.2553	149.909	114.72	104.642	203.144	146.223	107.96	111.974		56.6271	174.569	168.156	176.976	143.845	124.481	69.0787
140	112.468	107.513	149.428	114.058	109.314	170.082	245.497		101.301	184.304	160.514	148.837	244.663	199.139	155.594	164.422		96.8696	237.749	196.637	221.053	193.804	173.253	100.313
160	169.449	152.012	207.761	163.233	148.542	217.962	298.442		156.058	220.203	207.21	197.431	290.228	263.07	188.455	304.523		158.434	291.848	227.516	270.08	253.202	230.452	149.875
Fig.S10 E	Control	siRNA2	siRNA4
	169.449	156.058	158.434
	152.012	220.203	291.848
	207.761	207.21	227.516
	163.233	197.431	270.08
	148.542	290.228	253.202
	217.962	263.07	230.452
	298.442	188.455	149.875
		304.523
