# Supplementary material for: Functional coupling between TRPV4 channel and TMEM16F modulates human trophoblast fusion
Source: eLife. 2022 Jun 7;11:e78840. doi: 10.7554/eLife.78840 (PMC9236608; doi:10.7554/eLife.78840)
Supplement: Figure 5—source data 1. [file elife-78840-fig5-data1.xlsx]

## Sheet: Fig.5 C-D
Fig.5C	1	2	3	4	5
	72	300.2	120.345	100.3	123.5
	123.4	460.3	123.3	90.43	135.2
	124.3	360.2	132.5	110.23	100.3
	126	533	180.32	96.34	113.8
	88	249.2	120.1	46.36	142.1
		540.5	100.32	55.83	80.654
			120.01	120.32
			56.34
			120.43
Fig.5D	1	2	3	4	5
	124	290.343	120.345	104.675	132.233
	128.4	480.43	343.396	110.236	158.4
	120.3	350.54	495.969	127.32	129.822
	123.4	640.32	845.35	106.364	123.951
	84.8	289.43	203.129	47.523	164.584
		720.12	446.345	158.655	100.32
			120.43	133.265
			240.87
			703.52

## Sheet: Fig.5-S1B-C
Fig.5-S1B	Control-Fig.5B2	1	2		Fig.5-S1C	Control-Fig.5B1	2
	300.2	52.0334	88.1723			124	52.0334
	460.3	55.2576	72.4056			128.4	55.2576
	360.2	45.1768	51.9			120.3	45.1768
	533	68.292	58			123.4	68.292
	249.2	74.1103	28.1			84.8	74.1103
	540.5		120.32
