# Supplementary material for: Functional coupling between TRPV4 channel and TMEM16F modulates human trophoblast fusion
Source: eLife. 2022 Jun 7;11:e78840. doi: 10.7554/eLife.78840 (PMC9236608; doi:10.7554/eLife.78840)
Supplement: Figure 6—source data 1. [file elife-78840-fig6-data1.xlsx]

## Sheet: Fig.6
Panel B					Panel C
Time (s)	Calcium	AnV
0	0.981339	0			WT BeWo
5	1	-0.006			PS positive cell	7
10	0.989024	0.008			PS negetive cell	11
15	0.999162	-0.032
20	0.985386	0.044			TMEM16F KO BeWo
25	0.982115	0.032			PS positive cell	0
30	0.974951	0.024			PS negetive cell	21
35	0.970925	0.018
40	0.961768	-0.036
45	0.961185	-0.018
50	0.957853	-0.014
55	0.952652	-0.06
60	0.941583	-0.054
65	0.966418	0.002
70	0.985089	-0.01
75	0.990393	-0.042
80	0.976137	-0.03
85	0.965651	0.094
90	0.95584	-0.016
95	0.962309	-0.018
100	0.952028	-0.11
105	0.969688	0.016
110	0.956719	0.016
115	0.97026	-0.082
120	0.973766	0.024
125	0.982432	0.002
130	1.00326	0.012
135	1.02955	0.078
140	1.04974	-0.028
145	1.07362	0.03
150	1.04196	-0.094
155	1.02725	-0.01
160	1.03791	-0.066
165	1.07089	-0.03
170	1.10587	-0.048
175	1.18571	-0.052
180	1.24615	-0.076
185	1.27079	-0.074
190	1.31694	-0.064
195	1.37034	-0.034
200	1.44493	-0.086
205	1.50003	-0.078
210	1.49693	-0.074
215	1.55574	-0.054
220	1.60885	-0.048
225	1.68071	-0.008
230	1.72923	-0.08
235	1.75647	-0.006
240	1.79317	-0.018
245	1.84397	0.164
250	1.89115	0.876
255	1.90174	1.346
260	1.91821	1.504
265	1.854	2.182
270	1.74187	2.298
275	1.58336	2.722
280	1.37912	2.854
285	1.19989	2.69
290	1.04588	2.612
295	0.989392	2.846
300	0.964486	2.646
305	0.957966	3.304
310	0.959284	3.952
315	0.963852	3.862
320	0.948185	4.514
325	0.939754	4.946
330	0.959213	5.088
335	0.96374	5.076
340	0.959652	4.846
345	0.948788	4.572
350	0.94981	4.394
355	0.93957	3.94
360	0.953929	2.776
365	0.965048	2.214
370	0.965723	1.178
375	0.969995	0.664
380	0.968104	0.204
385	1.01337	0.128
390	1.02731	0.208
395	1.035	0.068
400	1.02798	-0.034
405	1.00639	0.006
410	1.00803	-0.022
415	1.00156	0.062
420	1.00757	0.096
425	1.00048	0.04
430	0.994185	0.02
435	0.997547	0.058
440	0.988809	-0.072
445	1.00727	-0.07
450	1.03137	-0.06
455	1.02079	0.002
460	1.02451	-0.056
465	1.04948	-0.012
470	1.03731	0.076
475	1.02777	-0.02
480	1.02697	0.01
485	1.03711	0.12
490	1.02873	-0.022
495	1.02716	0.052
500	1.02669	0.098
505	1.03585	0.052
510	1.04191	0.066
515	1.02049	0.12
520	1.04015	0.062
525	1.03326	0.02
530	1.02566	0.05
535	1.0208	0.084
540	1.02734	-0.01
545	1.01495	0.05
550	1.0051	0.072
555	1.00604	-0.046
560	1.00334	0.178
565	1.01552	0.08
570	1.00065	0.094
575	0.985294	0.096
		0.026
		0.176
		0.096
		0.076

## Sheet: Fig. 6-S1B
Time (s)	Ca2+	AnV
0	1	0
5	0.982771	0.006313
10	1.06649	0.003788
15	0.963354	-0.0202
20	1.06186	-0.02273
25	1.06293	-0.00126
30	1.12547	0.015152
35	1.07858	0.016414
40	1.10157	-0.00631
45	1.11294	-0.03409
50	1.15587	0.021465
55	1.09084	-0.01136
60	1.15188	-0.03788
65	1.13019	-0.05556
70	1.11265	0.027778
75	1.06971	-0.0303
80	1.10479	0.012626
85	1.12845	-0.03157
90	1.19857	-0.04167
95	1.18103	-0.01389
100	1.21765	0.007576
105	1.17131	0.015152
110	1.14785	-0.0101
115	1.14607	-0.01515
120	1.08365	-0.00758
125	1.24398	0.016414
130	1.22988	-0.0404
135	1.20526	0.044192
140	1.19076	0
145	1.21799	0.039141
150	1.18421	0.026515
155	1.20675	-0.01389
160	1.16406	0.017677
165	1.2159	0.001263
170	1.154	0.039141
175	1.19239	0.007576
180	1.22008	-0.03662
185	1.22838	0.063131
190	1.18357	-0.05556
195	1.19152	0.040404
200	1.20787	-0.01263
205	1.16149	0.035354
210	1.14648	-0.0404
215	1.19285	0.030303
220	1.1697	0.001263
225	1.18732	0.030303
230	1.14983	0.031566
235	1.19215	-0.05934
240	1.1466	-0.0101
245	1.22024	0.026515
250	1.18725	-0.01515
255	1.18229	-0.00758
260	1.18107	-0.01136
265	1.18254	-0.01136
270	1.17609	-0.02399
275	1.21271	-0.01389
280	1.22754	-0.03535
285	1.27255	-0.0101
290	1.23637	-0.01641
295	1.23539	0.012626
300	1.25906	-0.03157
305	1.28205	-0.02904
310	1.27232	-0.04798
315	1.22874	0.005051
320	1.21377	0.035354
325	1.23255	-0.00126
330	1.21723	0.061869
335	1.24993	-0.00253
340	1.32588	0.017677
345	1.41953	0.026515
350	1.45998	-0.00505
355	1.78739	0.016414
360	2.08061	0.021465
365	2.41445	-0.0404
370	2.56031	0.032828
375	2.46524	-0.00758
380	2.47963	-0.00379
385	2.31465	-0.01894
390	2.23081	-0.00253
395	1.79397	-0.04167
400	1.75864	0.045455
405	1.49662	0.034091
410	1.5102	0.002525
415	1.40437	0.069444
420	1.49142	0.02399
425	1.43285	0.022727
430	1.46895	-0.0101
435	1.3754	0.026515
440	1.5221	0.099747
445	1.51102	-0.02273
450	1.51893	0.026515
455	1.38879	0.082071
460	1.41999	0.032828
465	1.37554	0.044192
470	1.42567	0.032828
475	1.64123	0.060606
480	1.67281	0.044192
485	1.6014	0.034091
490	1.62532	0.108586
495	1.642	0.035354
500	1.53827	0.032828
505	1.52847	0.05303
510	1.42769	-0.02525
515	1.39791	0.056818
520	1.37403	0.044192
525	1.45479	-0.02399
530	1.42204	0.042929
535	1.42748	0.04798
540	1.43698	0.040404
545	1.42593	0.008838
550	1.45495	0.032828
555	1.35736	0.037879
560	1.38165	0.017677
565	1.39174	0.055556
570	1.3736	0.078283
575	1.33504	0.011364
580	1.45189	0.007576
585	1.40862	0.035354
590	1.41944	0.006313
595	1.42069	0.039141
