# Supplementary material for: Functional coupling between TRPV4 channel and TMEM16F modulates human trophoblast fusion
Source: eLife. 2022 Jun 7;11:e78840. doi: 10.7554/eLife.78840 (PMC9236608; doi:10.7554/eLife.78840)
Supplement: Figure 7—source data 1. — No quantification was involved. [file elife-78840-fig7-data1.xlsx]

## Sheet: Fig. 7B
	Fusion Index	Control	GSK 2193874 (100nM)
		0.322083	0.212217
		0.363636	0.18125
		0.421552	0.203125
		0.37535	0.279031
		0.335971
		0.454286

## Sheet: Fig.7D
	Fusion Index	Scramble siRNA	TRPV4 siRNA2	TRPV4 siRNA4
		0.546567	0.364216	0.166739
		0.416667	0.34	0.278274
		0.383791	0.205128	0.247962
		0.430238	0.193609	0.107955
		0.315527	0.323413	0.42287
		0.463264	0.222222	0.175622
		0.359295	0.144906	0.26243

## Sheet: Fig.7F
	CGB			CSH1			SYN1
	DMSO	GSK219		DMSO	GSK219		DMSO	GSK219
	0.989305	0.0824285		0.935777	0.102902		1.00641	1.15598
	1.09916	0.124468		0.797266	0.0992133		1.05474	1.13867
	0.919617	0.208758		1.34037	0.121047		0.942067	1.34967
